# Supplementary material for: Regioselective synthesis of functionalized pyrazole-chalconesviaa base mediated reaction of diazo compounds with pyrylium salts
Source: Royal Society of Chemistry journal article supplement (doi:10.1039/d1ob00274k), 2021-01-01
Supplement: d1ob00274k1.pdf [file d1ob00274k1.pdf]

Supporting Information  
For

**Regioselective Synthesis of Functionalized Pyrazole-Chalcones via Base Mediated Reaction of Diazo Compounds with Pyrylium Salts**

Lalita Devi,<sup>a,b</sup> Gaurav Sharma,<sup>c,b</sup> Ruchir Kant,<sup>d</sup> Sanjeev K. Shukla,<sup>\*,c,b</sup> Namrata Rastogi<sup>\*,a,b</sup>

<sup>a</sup>Medicinal & Process Chemistry Division, <sup>c</sup>Sophisticated Analytical Instrument Facility, and <sup>d</sup>Molecular & Structural Biology Division, CSIR-Central Drug Research Institute, Sector 10, Jankipuram Extension, Sitapur Road, P.O. Box 173, Lucknow 226031, India

<sup>b</sup>Academy of Scientific and Innovative Research (AcSIR), Ghaziabad-201002, India  
*namrataiii@gmail.com; namrata.rastogi@cdri.res.in*

**Table of Contents**

|                                                                                               |       |
|-----------------------------------------------------------------------------------------------|-------|
| General Information.....                                                                      | 2     |
| General Procedures.....                                                                       | 2     |
| Details of Variable Temperature NMR Experiments.....                                          | 2-3   |
| Details of X-ray Analysis of <b>3a</b> .....                                                  | 3-4   |
| References.....                                                                               | 5     |
| Characterization Data.....                                                                    | 5-14  |
| Copies of <sup>1</sup> H, <sup>13</sup> C, <sup>31</sup> P & <sup>19</sup> F NMR Spectra..... | 14-72 |

Comment [N]: spelling corrected

## 1. General Information

Until mentioned otherwise, all reactions were carried out under nitrogen atmosphere in flame-dried glassware. All reactions were monitored by Thin Layer Chromatography (TLC) and visualization was effected with UV and/or by developing in iodine. Melting points were recorded on a Precision melting point apparatus and are uncorrected. NMR spectra were recorded on a Bruker Avance spectrometer at 300/400/500 MHz ( $^1\text{H}$ ), 75/100/125 MHz ( $^{13}\text{C}$ ), 121/162 MHz ( $^{31}\text{P}$ ) and 282/376 MHz ( $^{19}\text{F}$ ). Chemical shifts are reported in  $\delta$  (ppm) relative to TMS as the internal standard for  $^1\text{H}$  and  $^{13}\text{C}$ . To describe spin multiplicity, standard abbreviations such as s, d, t, q, m, dd referring to singlet, doublet, triplet, quartet, multiplet and doublet of doublet respectively, are used. The ESI-HRMS spectra were recorded on Agilent 6520- Q-ToF/MS system.

The starting substrates i.e. trisubstituted-pyrylium tetrafluoroborate salts<sup>1</sup> and diazo compounds<sup>2</sup> were synthesized according to standard protocols. All other chemicals and catalysts were purchased from commercial sources and used as received.

## 2. General Procedures

### General procedure for the reaction of 2,4,6-trisubstituted pyrylium tetrafluoroborate salts **1** with diazo compounds **2**

In an oven dried 25 mL round bottom flask equipped with a magnetic stirring bar, the trisubstituted pyrylium tetrafluoroborate salt **1** (0.4 mmol) and diazo substrate **2** (0.2 mmol) were dissolved in anhydrous  $\text{CH}_3\text{CN}$  (5.0 mL) followed by dropwise addition of DBU (0.4 mL, 0.3 mmol) in the reaction mixture. The resulting reaction mixture was stirred at room temperature until reaction completion (2-6 h; TLC monitoring). The reaction mixture was concentrated under reduced pressure and diluted with water (10 mL). The crude product was extracted with dichloromethane (10 mL x 3) and the organic layer was washed with brine (5 mL x 3), dried over  $\text{Na}_2\text{SO}_4$  and concentrated under reduced pressure. The crude product was purified by column chromatography on neutral silica gel (100-200 mesh) using hexane/ethyl acetate as eluent to afford the pure product **3**.

### General procedure for conversion of pyrazole-chalcones **3** into indenyl-pyrazoles **4**

In an oven dried 25 mL round bottom flask equipped with a magnetic stirring bar, the sulfonylated pyrazole-chalcone **3** (0.1 mmol) and  $\text{NaBH}_4$  (15 mg, 0.4 mmol) were taken in toluene (5.0 mL). The reaction mixture was stirred at room temperature until reaction completion (2-4 h; TLC monitoring) and 1N acetic acid (2.0 mL, excess) was added. After stirring at room temperature for additional 15 minutes, the reaction mixture was diluted with water (5 mL) and extracted with ethyl acetate (5 mL x 3). The organic layer was washed with brine (5 mL x 3), dried over  $\text{Na}_2\text{SO}_4$  and concentrated under reduced pressure. The crude product was purified by column chromatography on neutral silica gel (100-200 mesh) using hexane/ethyl acetate as eluent to afford the pure product **4**.

## 3. Details of Variable Temperature NMR Experiments

In order to record  $^1\text{H}$  NMR at variable temperatures, a 33.3 mM solution of **3c** was prepared freshly and NMR was recorded at 223K, 300K and 323K (Figure 1). The singlets at 3.80 ppm and 3.75 ppm are for -OMe group in the major and minor isomers, respectively which are

Comment [N]: spelling corrected

little shielded at. The “doublets” for PO(OMe)<sub>2</sub> group in major and minor isomers are not resolved well at 223 and 300K, either due to slow intermediate exchange causing peak-broadening or due to shielding of the minor doublet (notably, the -OMe peak in the minor isomer is also shielded at 223K). However at 323 K, both the doublets for minor as well as for the major tautomer are well resolved and appear at 3.68 ppm ( $^3J_{\text{H-P}} = 11.3$  Hz) and 3.66 ppm ( $^3J_{\text{H-P}} = 11.4$  Hz), respectively.<sup>3</sup>

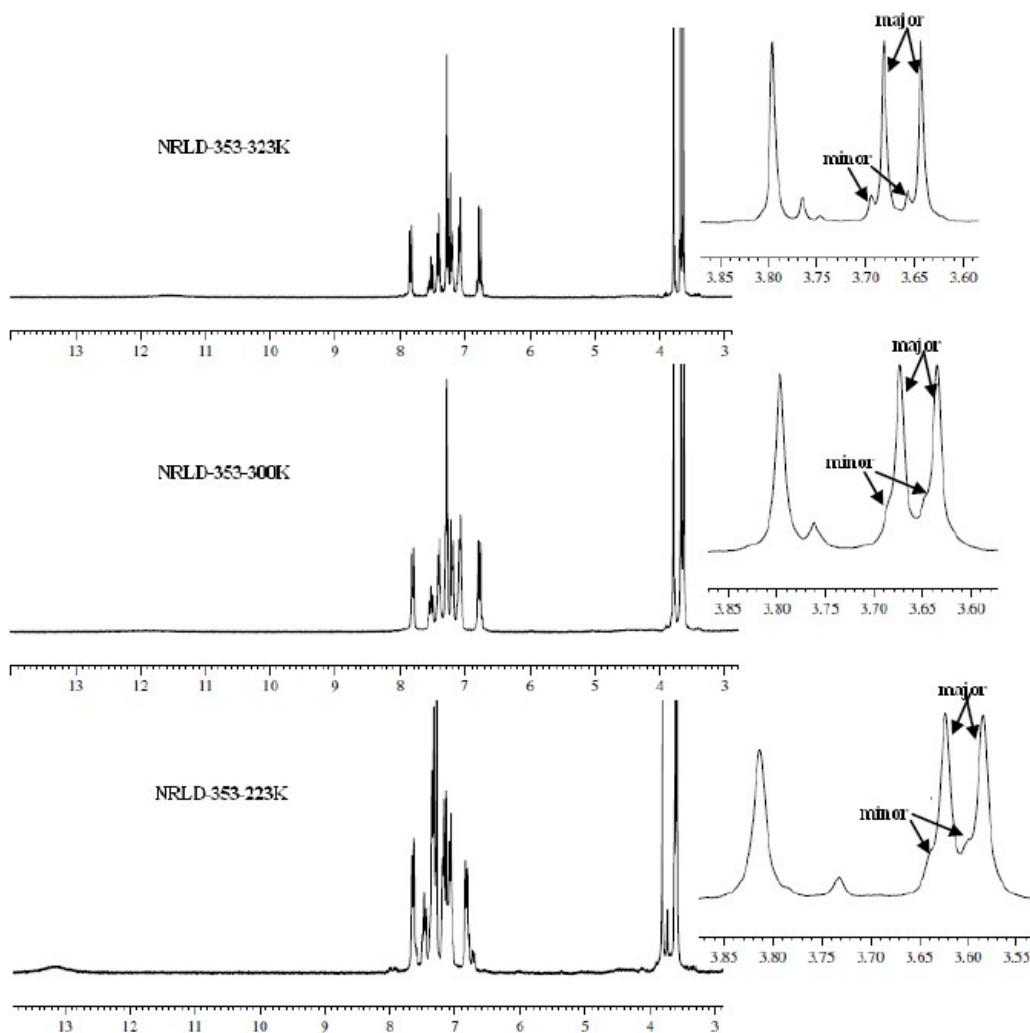

**Figure 1.** <sup>1</sup>H NMR spectrum of **3c** recorded at variable temperatures

#### 4. Details of X-ray Analysis of **3a**

A good quality single crystal of compound **3a** of size 0.20 x 0.19 x 0.16 mm, was selected under a polarizing microscope and mounted on a glass fibre for data collection. Single crystal X-ray data for compound **3a** was collected on the Rigaku Kappa 3 circle diffractometer equipped with the AFC-12 goniometer and enhanced sensitivity (HG) Saturn724+ CCD detector in the 4x4 bin mode using the monochromated Mo-K $\alpha$  radiation generated from the microfocus sealed tube MicroMax-003 X-ray generator equipped with specially designed confocal multilayer optics. Data collection was performed using  $\omega$ -scans of 0.5 $^\circ$  steps at 293(2) K. Cell determination, data collection and data reduction was performed using the Rigaku CrystalClear-SM Expert 2.1 b24 software.<sup>4</sup> Structure solution and refinement were performed by using SHELX-97.<sup>5</sup> Refinement of coordinates and anisotropic thermal

parameters of non-hydrogen atoms were carried out by the full-matrix least-squares method. The hydrogen atoms attached to carbon atoms were generated with idealized geometries and isotropically refined using a riding model.

**Crystallization:** Crystals of compound **3a** were grown from the solvent DCM:MeOH (1:3) by slow evaporation method (Figure 2; Table 1).

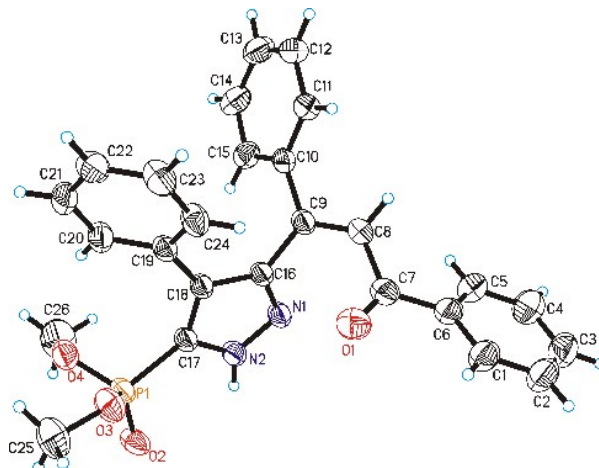

**Figure 2.** ORTEP diagram drawn with molecule of solvent of crystallization with 30% ellipsoid probability for non-H atoms of the crystal structure of compound **3a** determined at 293 K

**Table 1** Crystal data and structure refinement details for **3a**

| Compound                                                        | <b>3a</b>                                                       |
|-----------------------------------------------------------------|-----------------------------------------------------------------|
| Empirical formula                                               | C <sub>26</sub> H <sub>23</sub> N <sub>2</sub> O <sub>4</sub> P |
| Formula weight                                                  | 458.43                                                          |
| Crystal System                                                  | Triclinic                                                       |
| Space group                                                     | <i>P</i> -1                                                     |
| <i>a</i> (Å)                                                    | 8.83667(15)                                                     |
| <i>b</i> (Å)                                                    | 12.0256(2)                                                      |
| <i>c</i> (Å)                                                    | 12.1039(2)                                                      |
| <i>α</i> (°)                                                    | 83.6482(15)                                                     |
| <i>β</i> (°)                                                    | 74.9958(16)                                                     |
| <i>γ</i> (°)                                                    | 70.8882(16)                                                     |
| <i>V</i> (Å <sup>3</sup> )                                      | 1173.43(4)                                                      |
| <i>Z</i>                                                        | 2                                                               |
| <i>D<sub>c</sub></i> (g/cm <sup>3</sup> )                       | 1.297                                                           |
| <i>F</i> <sub>000</sub>                                         | 480                                                             |
| <i>μ</i> (mm <sup>-1</sup> )                                    | 1.328                                                           |
| <i>θ</i> <sub>max</sub> (°)                                     | 72.72                                                           |
| Total reflections                                               | 10050                                                           |
| Unique reflections                                              | 4092                                                            |
| Reflections [ <i>I</i> > 2σ( <i>I</i> )]                        | 3651                                                            |
| Parameters                                                      | 305                                                             |
| <i>R</i> <sub>int</sub>                                         | 0.1042                                                          |
| Goodness-of-fit                                                 | 1.067                                                           |
| <i>R</i> [ <i>F</i> <sup>2</sup> > 2σ( <i>F</i> <sup>2</sup> )] | 0.0753                                                          |
| <i>wR</i> ( <i>F</i> <sup>2</sup> , all data)                   | 0.2172                                                          |
| CCDC No.                                                        | 2038874                                                         |

## 5. References

- (1) For preparation of trisubstituted-pyrylium tetrafluoroborate salts, see: (a) C. T. F. Salfeena, Basavaraja, K. T. Ashitha, V. P. Kumar, S. Varughese, C. H. Suresh, B. S. Sashidhar, *Chem. Commun.* **2018**, *54*, 12463-12466; (b) L. E. E. Broeckx, S. Gven, F. J. L. Heutz, M. Lutz, D. Vogt, C. Muller, *Chem. Eur. J.* **2013**, *19*, 13087-13098; (c) Y. Zhao, B. Huang, C. Yang, B. Li, B. Gou, W. Xia, *ACS Catal.* **2017**, *7*, 2446-2451; (d) B. Breit, R. Winde, T. Mackewitz, R. Paciello, K. Harms, *Chem. Eur. J.* **2001**, *7*, 3106-3121; (e) T. W. Greulich, C. G. Daniliuc, A. Studer, *Org. Lett.* **2015**, *17*, 254-257.
- (2) For preparation of diazo substrates, see: (a) T. Du, F. Du, Y. Ning, Y. Peng, *Org. Lett.* **2015**, *17*, 1308-1311; (b) S. Zhu, J. V. Ruppel, H. Lu, L. Wojtas, X. P. Zhang, *J. Am. Chem. Soc.* **2008**, *130*, 5042-5043; (c) G. A. Molander, D. Ryu, *Angew. Chem., Int. Ed.* **2014**, *53*, 14181-14185; (d) J. Jeong, D. Lee, S. Chang, *Chem. Commun.* **2015**, *51*, 7035-7038; (e) J. Zhang, W. Chen, D. Huang, X. Zeng, X. Wang, Y. Hu, *J. Org. Chem.* **2017**, *82*, 9171-9174.
- (3) R. Muruganatham, I. Namboothiri, *J. Org. Chem.* **2010**, *75*, 2197-2205
- (4) CrystalClear 2.1, Rigaku Corporation, Tokyo, Japan
- (5) G. M. Sheldrick, *Acta Crystallogr. Sect. A* **2008**, *64*, 112-122

## 6. Characterization Data

### Dimethyl (Z)-(3-(3-oxo-1,3-diphenylprop-1-en-1-yl)-4-phenyl-1H-pyrazol-5-yl)phosphonate (3a)

White solid; isolated yield 72% (66 mg).  $R_f$  0.50 (70% EtOAc/hexane); Mp 159-160 °C;  $^1\text{H}$  NMR (300 MHz,  $\text{CDCl}_3$ )  $\delta$  7.76 (d,  $J = 7.5$  Hz, 2H), 7.45 (t,  $J = 7.3$  Hz, 1H), 7.32 (t,  $J = 7.6$  Hz, 2H), 7.14-7.24 (m merged with solvent peak, 6H), 7.06-7.09 (m, 2H), 6.96-7.01 (m, 3H), 3.55 (d,  $^3J_{\text{H-P}} = 11.4$  Hz, 6H);  $^{13}\text{C}$  NMR (75 MHz,  $\text{CDCl}_3$ )  $\delta$  191.60, 143.52, 139.12, 137.74, 132.96, 130.76, 129.80, 129.49, 128.67, 128.42, 128.38, 128.16, 128.02, 127.79, 127.66, 127.26, 53.16 (d,  $^2J_{\text{C-P}} = 5.3$  Hz);  $^{31}\text{P}$  NMR (162 MHz,  $\text{CDCl}_3$ )  $\delta$  10.90 (s); HRMS for  $\text{C}_{26}\text{H}_{23}\text{N}_2\text{O}_4\text{P}$ : calcd. ( $\text{MH}^+$ ): 459.1468, found: 459.1464

**Selected X-ray crystallographic data for 3a**,  $\text{C}_{26}\text{H}_{23}\text{N}_2\text{O}_4\text{P}$ ,  $M = 458.43$ , Triclinic,  $P -1$ ,  $a = 8.83667(15)$  Å,  $b = 12.0256(2)$  Å,  $c = 12.1039(2)$  Å,  $V = 1173.43(4)$  Å<sup>3</sup>,  $\alpha = 83.6482(15)$ °,  $\beta = 74.9958(16)$ °,  $\gamma = 70.8882(16)$ °,  $Z = 2$ ,  $D_c = 1.297$  g/cm<sup>3</sup>,  $\mu(\text{Mo-K}\alpha) = 1.328$  mm<sup>-1</sup>,  $F(000) = 480$ , Reflections collected: Unique 10050/4092 [ $R(\text{int}) = 0.1042$ ]. Final R indices [ $I > 2\sigma(I)$ ],  $R_1 = 0.0753$ ,  $wR_2 = 0.2172$ .

### Dimethyl (Z)-(3-(3-oxo-3-phenyl-1-(p-tolyl)prop-1-en-1-yl)-4-phenyl-1H-pyrazol-5-yl)phosphonate (3b)

Yellow solid; isolated yield 69% (65 mg).  $R_f$  0.50 (70% EtOAc/hexane); Mp 151-153 °C;  $^1\text{H}$  NMR (300 MHz,  $\text{CDCl}_3$ )  $\delta$  7.76 (d,  $J = 7.5$  Hz, 2H), 7.46-7.50 (m, 1H), 7.33-7.38 (m, 2H), 7.13-7.21 (m, 5H), 7.03 (br s, 5H), 3.61 (d,  $^3J_{\text{H-P}} = 11.4$  Hz, 6H), 2.28 (s, 3H);  $^{13}\text{C}$  NMR (75 MHz,  $\text{CDCl}_3$ )  $\delta$  191.44, 143.49, 139.80, 137.85, 136.21, 132.73, 130.80, 129.71, 129.14, 128.56, 128.25, 127.96, 127.88, 127.60, 127.13, 126.74, 53.10 (d,  $^2J_{\text{C-P}} = 5.5$  Hz), 21.20;  $^{31}\text{P}$  NMR (121 MHz,  $\text{CDCl}_3$ )  $\delta$  10.97 (s); HRMS for  $\text{C}_{27}\text{H}_{25}\text{N}_2\text{O}_4\text{P}$ : calcd. ( $\text{MH}^+$ ): 473.1625, found: 473.1630

**Dimethyl (Z)-(3-(1-(4-methoxyphenyl)-3-oxo-3-phenylprop-1-en-1-yl)-4-phenyl-1H-pyrazol-5-yl)phosphonate (3c)**

Yellow solid; isolated yield 64% (62 mg).  $R_f$  0.50 (80% EtOAc/hexane); Mp 84-92°C;  $^1\text{H}$  NMR (300 MHz,  $\text{CDCl}_3$ ): (major/minor in 1:0.70 ratio)  $\delta$  12.30 (br s, 1H), 7.75 (d,  $J = 7.3$  Hz, 2H, major), 7.56 (d,  $J = 7.4$  Hz, 2H, minor), 7.44-7.49 (m, 2H, minor), 7.26-7.37 (merged with solvent peak, 10H), 7.12-7.18 (m, 5H), 7.05-7.07 (m, 4H), 6.74-6.79 (m, 3H), 6.67 (d,  $J = 8.3$  Hz, 2H, minor), 3.76 (s, 3H, major), 3.70 (s, 3H, minor), 3.61 (d,  $^3J_{\text{H-P}} = 11.4$  Hz, 12H);  $^{13}\text{C}$  NMR (75 MHz,  $\text{CDCl}_3$ )  $\delta$  192.07, 191.28, 160.88, 159.98, 143.27, 138.04, 137.73, 132.71, 132.69, 131.47, 131.38, 131.05, 130.81, 130.07, 129.70, 129.47, 128.63, 128.52, 128.38, 128.29, 128.23, 127.95, 127.81, 127.65, 127.22, 126.43, 125.59, 113.92, 113.45, 55.35, 55.18, 53.14 (d,  $^2J_{\text{C-P}} = 5.5$  Hz);  $^{31}\text{P}$  NMR (162 MHz,  $\text{CDCl}_3$ ): (major/minor in 1:0.66 ratio)  $\delta$  10.95 (s, major), 10.20 (s, minor); HRMS for  $\text{C}_{27}\text{H}_{25}\text{N}_2\text{O}_5\text{P}$ : calcd. ( $\text{MH}^+$ ): 489.1574, found: 489.1576

**Dimethyl (Z)-(3-(1-(4-chlorophenyl)-3-oxo-3-phenylprop-1-en-1-yl)-4-phenyl-1H-pyrazol-5-yl)phosphonate (3d)**

Yellow solid; isolated yield 50% (49 mg).  $R_f$  0.50 (65% EtOAc/hexane); Mp 113-115°C;  $^1\text{H}$  NMR (400 MHz,  $\text{CDCl}_3$ )  $\delta$  7.71 (d,  $J = 7.3$  Hz, 2H), 7.42 (t,  $J = 7.4$  Hz, 1H), 7.30 (t,  $J = 7.7$  Hz, 2H), 7.09-7.18 (m merged with solvent peak, 5H), 7.04-7.07 (m, 2H), 6.98-7.01 (m, 3H), 3.52 (d,  $^3J_{\text{H-P}} = 11.5$  Hz, 6H);  $^{13}\text{C}$  NMR (100 MHz,  $\text{CDCl}_3$ )  $\delta$  191.46, 142.61, 137.62, 137.58, 135.45, 132.99, 130.60, 129.67, 129.21, 128.63, 128.59, 128.38, 128.14, 127.91, 127.75, 127.41, 53.17 (d,  $^2J_{\text{C-P}} = 5.3$  Hz);  $^{31}\text{P}$  NMR (162 MHz,  $\text{CDCl}_3$ ): (major/minor in 1:0.04 ratio)  $\delta$  12.92 (s, minor), 10.45 (s, major); HRMS for  $\text{C}_{26}\text{H}_{22}\text{ClN}_2\text{O}_4\text{P}$ : calcd. ( $\text{MH}^+$ ): 493.1078, found: 493.1079

**Dimethyl (Z)-(3-(1-(4-bromophenyl)-3-oxo-3-phenylprop-1-en-1-yl)-4-phenyl-1H-pyrazol-5-yl)phosphonate (3e)**

White solid; isolated yield 48% (51 mg).  $R_f$  0.50 (65% EtOAc/hexane); Mp 130-132 °C;  $^1\text{H}$  NMR (300 MHz,  $\text{CDCl}_3$ ): (minor tautomer in traces)  $\delta$  7.70-7.73 (m, 2H), 7.40-7.46 (m, 1H), 7.25-7.33 (m, 4H), 7.10-7.12 (m, 2H), 7.05-7.08 (m, 3H), 6.99-7.02 (m, 3H), 3.53 (d,  $^3J_{\text{H-P}} = 11.5$  Hz, 6H);  $^{13}\text{C}$  NMR (75 MHz,  $\text{CDCl}_3$ )  $\delta$  191.43, 142.67, 138.03, 137.56, 132.95, 131.52, 130.55, 129.63, 129.42, 128.60, 128.33, 128.07, 127.91, 127.74, 127.38, 123.75, 53.15 (d,  $^2J_{\text{C-P}} = 5.5$  Hz);  $^{31}\text{P}$  NMR (121 MHz,  $\text{CDCl}_3$ ): (major/minor in 1:0.03 ratio)  $\delta$  12.95 (s, minor), 10.41 (s, major); HRMS for  $\text{C}_{26}\text{H}_{22}\text{BrN}_2\text{O}_4\text{P}$ : calcd. ( $\text{MH}^+$ ): 537.0573, found: 537.0578

**Dimethyl (Z)-(4-(4-methoxyphenyl)-3-(3-(4-methoxyphenyl)-3-oxo-1-phenylprop-1-en-1-yl)-1H-pyrazol-5-yl)phosphonate (3f)**

Yellow solid; isolated yield 65% (67 mg).  $R_f$  0.50 (85% EtOAc/hexane); Mp 84-86 °C;  $^1\text{H}$  NMR (300 MHz,  $\text{CDCl}_3$ ): (major/minor in 1:0.24 ratio)  $\delta$  7.78 (d,  $J = 7.9$  Hz, 2H, major), 7.55-7.63 (m, 2H, minor), 7.19-7.43 (m merged with solvent peak, 13H), 7.05 (d,  $J = 8.1$  Hz, 2H, major), 6.85 (d,  $J = 8.2$  Hz, 2H, major), 6.66-6.80 (m, 3H, minor), 6.56 (d,  $J = 8.2$  Hz, 2H, major), 3.85 (s, 3H, major), 3.80 (s, 3H, minor), 3.72 (d,  $^3J_{\text{H-P}} = 11.5$  Hz, 6H, minor), 3.65, 3.61 (s, 3H, major and d, 6H major merged together);  $^{13}\text{C}$  NMR (75 MHz,  $\text{CDCl}_3$ )  $\delta$

191.08, 163.51, 158.66, 142.38, 139.30, 131.04, 131.00, 130.64, 130.59, 129.28, 128.38, 128.15, 127.93, 123.06, 113.53, 113.14, 55.46, 54.95, 53.10 (d,  $^2J_{C-P} = 5.6$  Hz);  $^{31}P$  NMR (121 MHz,  $CDCl_3$ ): (major/minor in 1:0.09 ratio)  $\delta$  13.47 (s, minor), 11.50 (s, major); HRMS for  $C_{28}H_{27}N_2O_6P$ : calcd. (MH<sup>+</sup>): 519.1679, found: 519.1682

**Dimethyl (Z)-(3-(1,3-bis(4-methoxyphenyl)-3-oxoprop-1-en-1-yl)-4-(4-methoxyphenyl)-1H-pyrazol-5-yl)phosphonate (3g)**

Yellow solid; isolated yield 61% (67 mg).  $R_f$  0.50 (90% EtOAc/hexane); Mp 77-80 °C;  $^1H$  NMR (400 MHz,  $CDCl_3$ ): (major/minor in 1:0.12 ratio)  $\delta$  7.79 (m appearing as d,  $J = 8.8$  Hz, 2H, major), 7.54-7.57 (m, 2H, minor), 7.33-7.36 (m, 2H, minor), 7.22-7.26 (m merged with solvent peak, 2H, major), 7.17-7.19 (s, 1H, major merged with m, 1H, minor), 7.06-7.09 (m, 2H, major), 6.89-6.91 (m, 3H, minor), 6.84-6.88 (m, 2H, major), 6.73-6.77 (m, 2H, major merged with m, 2H, minor), 6.56-6.60 (m, 2H, major), 3.86 (s, 3H, major), 3.81 (s, 3H, minor), 3.80 (s, 3H, minor), 3.78 (s, 3H, major), 3.75 (s, 3H, minor), 3.67 (d,  $^3J_{H-P} = 11.4$  Hz, 6H, minor), 3.67 (s, 3H, major), 3.65 (d,  $^3J_{H-P} = 11.4$  Hz, 6H, major);  $^{13}C$  NMR (100 MHz,  $CDCl_3$ )  $\delta$  189.86, 163.42, 160.73, 158.67, 142.09, 131.57, 131.26, 130.96, 130.88, 129.41, 127.93, 127.72, 126.11, 123.12, 113.91, 113.52, 113.18, 55.48, 55.37, 54.98, 53.13 (d,  $^2J_{C-P} = 5.6$  Hz);  $^{31}P$  NMR (162 MHz,  $CDCl_3$ ): (major/minor in 1:0.13 ratio)  $\delta$  11.60 (s, major), 10.77 (s, minor); HRMS for  $C_{29}H_{29}N_2O_7P$ : calcd. (MH<sup>+</sup>): 549.1785, found: 549.1776

**Dimethyl (Z)-(3-(1-(4-methoxyphenyl)-3-oxo-3-(p-tolyl)prop-1-en-1-yl)-4-(p-tolyl)-1H-pyrazol-5-yl)phosphonate (3h)**

Yellow solid; isolated yield 67% (69 mg).  $R_f$  0.50 (70% EtOAc/hexane); Mp 84-92 °C;  $^1H$  NMR (300 MHz,  $CDCl_3$ ): (major/minor in 1:0.25 ratio)  $\delta$  7.67 (d,  $J = 7.6$  Hz, 2H, major), 7.47 (d,  $J = 7.8$  Hz, 2H, minor), 7.26-7.29 (m, 5H), 7.15-7.18 (m merged with solvent peak, 6H), 7.04-7.09 (m, 4H), 6.84-6.87 (m appearing as d,  $J = 7.6$  Hz, 3H), 6.73-6.79 (m, 4H), 3.79 (s, 3H, major), 3.75 (s, 3H, minor), 3.64 (d,  $^3J_{H-P} = 11.4$  Hz, 12H), 2.39 (s, 3H, major), 2.37 (s, 3H, minor), 2.34 (s, 3H, minor), 2.17 (s, 3H, major);  $^{13}C$  NMR (75 MHz,  $CDCl_3$ )  $\delta$  191.62, 190.88, 160.80, 159.93, 143.54, 143.48, 142.67, 137.56, 136.74, 135.43, 135.28, 131.59, 130.97, 129.93, 129.58, 129.43, 129.18, 128.96, 128.90, 128.83, 128.73, 128.41, 128.23, 127.77, 126.63, 125.88, 113.91, 113.49, 55.36, 55.19, 53.14 (d,  $^2J_{C-P} = 5.6$  Hz), 53.11 (d,  $^2J_{C-P} = 5.5$  Hz), 21.65, 21.61, 21.28, 21.08;  $^{31}P$  NMR (162 MHz,  $CDCl_3$ ): (major/minor in 1:0.60 ratio)  $\delta$  11.31 (s, major), 10.53 (s, minor); HRMS for  $C_{29}H_{29}N_2O_5P$ : calcd. (MH<sup>+</sup>): 517.1887, found: 517.1883

**Diethyl (Z)-(3-(3-oxo-1,3-diphenylprop-1-en-1-yl)-4-phenyl-1H-pyrazol-5-yl)phosphonate (3i)**

Yellow solid; isolated yield 47% (46 mg).  $R_f$  0.50 (70% EtOAc/hexane); Mp 133-135 °C;  $^1H$  NMR (400 MHz,  $CDCl_3$ )  $\delta$  12.25 (br s, 1H), 7.76 (t,  $J = 6.9$  Hz, 2H), 7.43-7.47 (m, 1H), 7.29-7.35 (m, 4H), 7.21-7.24 (m, 3H), 7.14-7.17 (m merged with solvent peak, 3H), 7.01-7.03 (m, 3H), 3.85-4.05 (m, 4H), 1.08 (t,  $^4J_{H-P} = 6.9$  Hz, 6H);  $^{13}C$  NMR (75 MHz,  $CDCl_3$ )  $\delta$  191.64, 139.25, 137.79, 132.67, 130.95, 129.80, 129.34, 128.60, 128.34, 128.21, 128.07, 127.95, 127.81, 127.66, 127.54, 127.09, 62.80 (d,  $^2J_{C-P} = 5.2$  Hz), 15.91 (d,  $^2J_{C-P} = 6.8$  Hz);

$^{31}\text{P}$  NMR (162 MHz,  $\text{CDCl}_3$ )  $\delta$  7.37 (s); HRMS for  $\text{C}_{28}\text{H}_{27}\text{N}_2\text{O}_4\text{P}$ : calcd. ( $\text{MH}^+$ ): 487.1781, found: 487.1780

**Diethyl (Z)-(3-(1-(4-methoxyphenyl)-3-oxo-3-phenylprop-1-en-1-yl)-4-phenyl-1H-pyrazol-5-yl)phosphonate (3j)**

Yellow solid; isolated yield 43% (44 mg).  $R_f$  0.50 (80% EtOAc/hexane); Mp 147-150 °C;  $^1\text{H}$  NMR (300 MHz,  $\text{CDCl}_3$ ): (major/minor in 1:0.13 ratio)  $\delta$  7.78 (d,  $J = 7.5$  Hz, 2H, maj), 7.53-7.56 (m, 2H, min), 7.48 (t,  $J = 7.2$  Hz, 1H, maj), 7.34-7.39 (m, 4H), 7.18-7.29 (m merged with solvent peak, 12H), 7.05-7.10 (m, 5H), 6.70-6.77 (m, 4H), 3.88-4.11 (m, 8H), 3.77 (s, 3H, maj), 3.73 (s, 3H, min), 1.13 (t,  $J = 7.1$  Hz, 12H);  $^{13}\text{C}$  NMR (75 MHz,  $\text{CDCl}_3$ )  $\delta$  191.36, 160.75, 159.75, 143.72, 138.09, 132.42, 131.56, 131.08, 131.02, 130.11, 129.70, 129.39, 128.64, 128.46, 128.11, 127.86, 127.55, 127.05, 126.32, 125.43, 113.83, 113.19, 62.80 (d,  $^2J_{\text{C-P}} = 5.3$  Hz), 55.30, 55.10, 15.89 (d,  $^3J_{\text{C-P}} = 6.9$  Hz);  $^{31}\text{P}$  NMR (121 MHz,  $\text{CDCl}_3$ ): (major/minor in 1:0.03 ratio)  $\delta$  9.29 (s, minor), 7.52 (s, major); HRMS for  $\text{C}_{29}\text{H}_{29}\text{N}_2\text{O}_5\text{P}$ : calcd. ( $\text{MH}^+$ ): 517.1887, found: 517.1882

**Diethyl (Z)-(3-(1-(4-chlorophenyl)-3-oxo-3-phenylprop-1-en-1-yl)-4-phenyl-1H-pyrazol-5-yl)phosphonate (3k)**

White solid; isolated yield 36% (37 mg).  $R_f$  0.50 (65% EtOAc/hexane); Mp 157-159°C;  $^1\text{H}$  NMR (300 MHz,  $\text{CDCl}_3$ )  $\delta$  12.38 (br s, 1H), 7.78 (d,  $J = 7.1$  Hz, 2H), 7.46-7.51 (m, 1H), 7.36 (t,  $J = 7.4$  Hz, 2H), 7.15-7.24 (m merged with solvent peak, 7H), 7.07-7.08 (br m, 3H), 3.88-4.07 (m, 4H), 1.11 (t,  $^4J_{\text{H-P}} = 6.9$  Hz, 6H);  $^{13}\text{C}$  NMR (75 MHz,  $\text{CDCl}_3$ )  $\delta$  191.49, 142.87, 137.69, 137.66, 135.35, 132.83, 130.76, 129.72, 129.17, 128.60, 128.55, 128.28, 128.07, 127.86, 127.82, 127.67, 127.28, 62.89 (d,  $^2J_{\text{C-P}} = 5.4$  Hz), 15.91 (d,  $^2J_{\text{C-P}} = 6.8$  Hz);  $^{31}\text{P}$  NMR (162 MHz,  $\text{CDCl}_3$ )  $\delta$  7.04 (s); HRMS for  $\text{C}_{28}\text{H}_{26}\text{ClN}_2\text{O}_4\text{P}$ : calcd. ( $\text{MH}^+$ ): 521.1391, found: 521.1384

**(Z)-1,3-Diphenyl-3-(4-phenyl-5-(phenylsulfonyl)-1H-pyrazol-3-yl)prop-2-en-1-one (3l)**

White solid; isolated yield 70% (69 mg).  $R_f$  0.50 (40% EtOAc/hexane); Mp 181-183 °C;  $^1\text{H}$  NMR (400 MHz,  $\text{CDCl}_3$ )  $\delta$  12.79 (br s, 1H), 7.87 (d,  $J = 7.4$  Hz, 2H), 7.63 (d,  $J = 7.4$  Hz, 2H), 7.48-7.59 (m, 2H), 7.29-7.46 (m, 5H), 7.18-7.22 (br m merged with solvent peak, 5H), 6.92-7.04 (m, 5H);  $^{13}\text{C}$  NMR (100 MHz,  $\text{CDCl}_3$ )  $\delta$  191.44, 149.45, 142.11, 140.51, 140.23, 138.64, 137.22, 133.60, 133.22, 130.73, 129.54, 129.21, 128.78, 128.64, 128.44, 128.38, 128.10, 127.50, 127.36, 123.83; HRMS for  $\text{C}_{30}\text{H}_{22}\text{N}_2\text{O}_3\text{S}$ : calcd. ( $\text{MH}^+$ ): 491.1424, found: 491.1427

**(Z)-1-phenyl-3-(4-phenyl-5-(phenylsulfonyl)-1H-pyrazol-3-yl)-3-p-tolylprop-2-en-1-one (3m)**

White solid; isolated yield 73% (74 mg).  $R_f$  0.50 (40% EtOAc/hexane); Mp 173-176 °C;  $^1\text{H}$  NMR (300 MHz,  $\text{CDCl}_3$ )  $\delta$  12.45 (br s, 1H), 7.65 (d,  $J = 7.8$  Hz, 2H), 7.47 (d,  $J = 7.6$  Hz, 2H), 7.30-7.41 (m, 2H), 7.12-7.27 (m, 4H), 7.02 (s, 1H), 6.91 (d,  $J = 8.2$  Hz, 2H), 6.74-6.87 (m, 7H), 2.13 (s, 3H);  $^{13}\text{C}$  NMR (75 MHz,  $\text{CDCl}_3$ )  $\delta$  191.35, 142.04, 140.59, 139.93, 137.37, 135.74, 133.46, 133.20, 130.72, 129.29, 129.11, 128.71, 128.65, 128.57, 128.11, 128.03,



127.53, 127.33, 123.73, 21.16; HRMS for C<sub>31</sub>H<sub>24</sub>N<sub>2</sub>O<sub>3</sub>S: calcd. (MH<sup>+</sup>): 505.1580, found: 505.1586

**(Z)-3-(4-methoxyphenyl)-1-phenyl-3-(4-phenyl-5-(phenylsulfonyl)-1H-pyrazol-3-yl)prop-2-en-1-one (3n)**

Yellow solid; isolated yield 60% (62 mg). *R<sub>f</sub>* 0.50 (50% EtOAc/hexane); Mp 159-161 °C; <sup>1</sup>H NMR (300 MHz, CDCl<sub>3</sub>) δ 12.49 (br s, 1H), 7.78 (d, *J* = 7.4 Hz, 2H), 7.61 (d, *J* = 7.5 Hz, 2H), 7.45-7.54 (m, 2H), 7.26-7.40 (m merged with solvent peak, 4H), 7.11-7.14 (m, 3H), 6.95-7.03 (m, 5H), 7.68 (d, *J* = 8.5 Hz, 2H), 3.74 (s, 3H); <sup>13</sup>C NMR (100 MHz, CDCl<sub>3</sub>) δ 191.23, 160.91, 141.58, 140.57, 137.47, 133.33, 133.20, 130.87, 130.65, 129.59, 129.32, 128.64, 128.51, 128.08, 127.49, 127.41, 126.45, 126.41, 123.50, 113.96, 55.40; HRMS for C<sub>31</sub>H<sub>24</sub>N<sub>2</sub>O<sub>4</sub>S: calcd. (MH<sup>+</sup>): 521.1530, found: 521.1533

**(Z)-3-(4-(methylthio)phenyl)-1-phenyl-3-(4-phenyl-5-(phenylsulfonyl)-1H-pyrazol-3-yl)prop-2-en-1-one (3o)**

Yellow solid; isolated yield 48% (51 mg). *R<sub>f</sub>* 0.50 (50% EtOAc/hexane); Mp 94-98 °C; <sup>1</sup>H NMR (300 MHz, CDCl<sub>3</sub>): (major/minor in 1:0.26 ratio) δ 12.46 (br s, 1H), 7.78 (d, *J* = 7.5 Hz, 2H, major), 7.60 (d, *J* = 7.6 Hz, 2H major + 2H minor), 7.42-7.54 (m, 5H), 7.22-7.44 (m merged with solvent peak, 10H), 7.17 (br s, 4H, minor), 6.90-7.09 (m, 14H), 6.77 (s, 1H, minor), 2.41 (s, 3H, major), 2.39 (s, 3H, minor); <sup>13</sup>C NMR (75 MHz, CDCl<sub>3</sub>) δ 191.28, 191.25, 141.52, 141.26, 140.53, 140.33, 137.34, 137.23, 134.99, 133.48, 133.24, 133.14, 130.72, 130.68, 129.85, 129.72, 129.23, 128.83, 128.69, 128.68, 128.58, 128.39, 128.17, 128.07, 127.55, 127.44, 127.32, 127.21, 125.89, 125.77, 123.66, 121.91, 15.36, 15.20; HRMS for C<sub>31</sub>H<sub>24</sub>N<sub>2</sub>O<sub>3</sub>S<sub>2</sub>: calcd. (MH<sup>+</sup>): 537.1301, found: 537.1295

**(Z)-3-(4-Chlorophenyl)-1-phenyl-3-(4-phenyl-5-(phenylsulfonyl)-1H-pyrazol-3-yl)prop-2-en-1-one (3p)**

White solid; isolated yield 52% (54 mg). *R<sub>f</sub>* 0.50 (40% EtOAc/hexane); Mp 190-192 °C; <sup>1</sup>H NMR (400 MHz, CDCl<sub>3</sub>) δ 12.99 (br s, 1H), 7.86 (d, *J* = 7.4 Hz, 2H), 7.54-7.59 (m, 3H), 7.40-7.49 (m, 3H), 7.16 (s, 1H), 7.07 (br s, 5H), 6.99 (t, *J* = 7.4 Hz, 2H), 6.87 (d, *J* = 7.2 Hz, 2H); <sup>13</sup>C NMR (100 MHz, CDCl<sub>3</sub>) δ 191.33, 140.99, 140.40, 137.09, 135.59, 133.71, 133.29, 130.66, 129.37, 129.07, 128.77, 128.68, 128.67, 128.58, 128.53, 128.04, 127.67, 127.50, 123.80; HRMS for C<sub>30</sub>H<sub>21</sub>ClN<sub>2</sub>O<sub>3</sub>S: calcd. (MH<sup>+</sup>): 525.1034, found: 525.1031

**(Z)-3-(4-bromophenyl)-1-phenyl-3-(4-phenyl-5-(phenylsulfonyl)-1H-pyrazol-3-yl)prop-2-en-1-one (3q)**

White solid; isolated yield 51% (58 mg). *R<sub>f</sub>* 0.50 (40% EtOAc/hexane); Mp 166-168 °C; <sup>1</sup>H NMR (300 MHz, CDCl<sub>3</sub>) δ 12.96 (br s, 1H), 7.84 (d, *J* = 6.8 Hz, 2H), 7.54-7.61 (m, 3H), 7.40-7.50 (m, 3H), 7.27-7.35 (m, 4H), 7.02-7.09 (m, 5H), 6.90 (d, *J* = 6.3 Hz, 2H); <sup>13</sup>C NMR (75 MHz, CDCl<sub>3</sub>) δ 191.29, 140.89, 140.36, 137.48, 136.98, 133.62, 133.23, 131.50, 130.58, 129.52, 128.99, 128.69, 128.63, 128.58, 128.49, 127.97, 127.61, 127.45, 123.86, 123.67; HRMS for C<sub>30</sub>H<sub>21</sub>BrN<sub>2</sub>O<sub>3</sub>S: calcd. (MH<sup>+</sup>): 569.0529, found: 569.0536

**(Z)-3-(4-fluorophenyl)-1-phenyl-3-(4-phenyl-5-(phenylsulfonyl)-1H-pyrazol-3-yl)prop-2-en-1-one (3r)**

White solid; isolated yield 37% (38 mg).  $R_f$  0.50 (40% EtOAc/hexane); Mp 202-204 °C;  $^1\text{H}$  NMR (300 MHz,  $\text{CDCl}_3$ )  $\delta$  12.86 (br s, 1H), 7.85 (d,  $J = 7.5$  Hz, 2H), 7.57 (d,  $J = 7.6$  Hz, 2H), 7.88-7.54 (m, 4H), 7.24-7.31 (m merged with solvent peak, 2H), 7.08-7.13 (m, 3H), 7.02 (d,  $J = 7.1$  Hz, 1H), 6.94-6.99 (m, 2H), 6.85-6.88 (m appearing as br d, 2H), 6.75-6.80 (m, 2H);  $^{13}\text{C}$  NMR (75 MHz,  $\text{DMSO-d}_6$ )  $\delta$  189.61, 163.05 (d,  $J_{\text{C-F}} = 246.7$  Hz), 148.30, 140.76, 139.90, 138.61, 137.17, 134.04, 133.68, 133.19, 129.87 (d,  $J_{\text{C-F}} = 8.8$  Hz), 129.75, 129.62, 129.21, 128.46, 128.37, 128.07, 127.51, 127.34, 120.72, 115.79 (d,  $J_{\text{C-F}} = 21.7$  Hz); HRMS for  $\text{C}_{30}\text{H}_{21}\text{FN}_2\text{O}_3\text{S}$ : calcd. ( $\text{MH}^+$ ): 509.1330, found: 509.1323

**(Z)-3-(3-methoxyphenyl)-1-phenyl-3-(4-phenyl-5-(phenylsulfonyl)-1H-pyrazol-3-yl)prop-2-en-1-one (3s)**

Yellow solid; isolated yield 54% (56 mg).  $R_f$  0.50 (50% EtOAc/hexane); Mp 75-77°C;  $^1\text{H}$  NMR (300 MHz,  $\text{CDCl}_3$ )  $\delta$  12.49 (br s, 1H), 7.77 (d,  $J = 7.5$  Hz, 2H), 7.52 (d,  $J = 8.0$  Hz, 2H), 7.31-7.47 (m, 4H), 7.20-7.25 (m, 2H), 7.11 (s, 1H), 6.82-7.00 (m, 6H), 6.62-6.69 (m, 2H), 6.55 (s, 1H), 3.61 (s, 3H);  $^{13}\text{C}$  NMR (75 MHz,  $\text{CDCl}_3$ )  $\delta$  191.45, 159.24, 142.05, 140.50, 140.00, 137.22, 133.67, 133.23, 130.73, 129.48, 129.27, 128.81, 128.66, 128.50, 128.36, 128.20, 128.08, 127.51, 127.32, 123.96, 120.73, 115.06, 113.94, 55.34; HRMS for  $\text{C}_{31}\text{H}_{24}\text{N}_2\text{O}_4\text{S}$ : calcd. ( $\text{MH}^+$ ): 521.1530, found: 521.1522

**(Z)-3-(3-Chlorophenyl)-1-phenyl-3-(4-phenyl-5-(phenylsulfonyl)-1H-pyrazol-3-yl)prop-2-en-1-one (3t)**

White solid; isolated yield 46% (48 mg).  $R_f$  0.50 (40% EtOAc/hexane); Mp 171-173 °C;  $^1\text{H}$  NMR (300 MHz,  $\text{CDCl}_3$ )  $\delta$  13.14 (br s, 1H), 7.87 (d,  $J = 7.4$  Hz, 2H), 7.53-7.58 (m, 3H), 7.40-7.47 (m, 3H), 7.24-7.31 (m merged with solvent peak, 2H), 6.96-7.14 (m, 8H), 6.86 (d,  $J = 6.6$  Hz, 2H);  $^{13}\text{C}$  NMR (75 MHz,  $\text{CDCl}_3$ )  $\delta$  191.38, 141.12, 140.41, 140.37, 137.11, 134.26, 133.92, 133.30, 130.74, 129.58, 129.28, 129.11, 128.90, 128.79, 128.68, 128.37, 128.11, 127.71, 127.40, 126.36, 124.26; HRMS for  $\text{C}_{30}\text{H}_{21}\text{ClN}_2\text{O}_3\text{S}$ : calcd. ( $\text{MH}^+$ ): 525.1034, found: 525.1026

**(Z)-1-(4-methoxyphenyl)-3-(4-(4-methoxyphenyl)-5-(phenylsulfonyl)-1H-pyrazol-3-yl)-3-phenylprop-2-en-1-one (3u)**

Yellow solid; isolated yield 67% (74 mg).  $R_f$  0.50 (55% EtOAc/hexane); Mp 232-234 °C;  $^1\text{H}$  NMR (300 MHz,  $\text{CDCl}_3$ )  $\delta$  12.70 (br s, 1H), 7.74-7.79 (m, 2H), 7.55-7.57 (m, 2H), 7.38-7.43 (m, 1H), 7.23-7.28 (m, 2H), 7.07-7.13 (m, 6H), 6.78-6.83 (m, 2H), 6.73-6.77 (m, 2H), 6.39-6.43 (m, 2H), 3.80 (s, 3H), 3.60 (s, 3H);  $^{13}\text{C}$  NMR (75 MHz,  $\text{CDCl}_3$ )  $\delta$  189.94, 164.02, 158.88, 141.35, 140.69, 138.93, 133.18, 131.99, 131.28, 130.21, 129.30, 128.81, 128.65, 128.35, 128.11, 123.57, 121.54, 113.85, 112.92, 55.56, 55.09; HRMS for  $\text{C}_{32}\text{H}_{26}\text{N}_2\text{O}_5\text{S}$ : calcd. ( $\text{MH}^+$ ): 551.1635, found: 551.1632

**(Z)-1-(4-methoxyphenyl)-3-(4-(4-methoxyphenyl)-5-(phenylsulfonyl)-1H-pyrazol-3-yl)-3-(p-tolyl)prop-2-en-1-one (3v)**

Yellow solid; isolated yield 70% (79 mg).  $R_f$  0.50 (55% EtOAc/hexane); Mp 215-217 °C;  $^1\text{H}$  NMR (300 MHz,  $\text{CDCl}_3$ )  $\delta$  12.50 (br s, 1H), 7.74-7.78 (m, 2H), 7.57-7.60 (m, 2H), 7.39-7.45 (m, 1H), 7.26-7.30 (m, 2H), 7.08 (s, 1H), 6.98, 6.89 (ABq,  $J_{\text{AB}} = 8.2$  Hz, 4H), 6.80-6.84 (m, 2H), 6.74-6.79 (m, 2H), 6.40-6.45 (m, 2H), 3.81 (s, 3H), 3.62 (s, 3H), 2.20 (s, 3H);  $^{13}\text{C}$  NMR (75 MHz,  $\text{CDCl}_3$ )  $\delta$  189.89, 163.90, 158.91, 141.15, 140.76, 139.64, 135.99, 133.17, 131.96, 131.19, 130.32, 129.11, 128.66, 128.12, 128.02, 127.95, 123.37, 121.62, 113.78, 112.91, 55.55, 55.08, 21.17; HRMS for  $\text{C}_{33}\text{H}_{28}\text{N}_2\text{O}_5\text{S}$ : calcd. ( $\text{MH}^+$ ): 565.1792, found: 565.1794

**(Z)-1,3-bis(4-methoxyphenyl)-3-(4-(4-methoxyphenyl)-5-(phenylsulfonyl)-1H-pyrazol-3-yl)prop-2-en-1-one (3w)**

White solid; isolated yield 63% (73 mg).  $R_f$  0.50 (60% EtOAc/hexane); Mp 232-235 °C;  $^1\text{H}$  NMR (300 MHz,  $\text{CDCl}_3$ )  $\delta$  12.48 (br s, 1H), 7.68 (d,  $J = 8.9$  Hz, 2H), 7.56 (d,  $J = 7.4$  Hz, 2H), 7.40 (t,  $J = 7.4$  Hz, 1H), 7.25 (t,  $J = 7.8$  Hz, 2H), 7.01-7.04 (m, 3H), 6.74-6.79 (m, 4H), 6.61 (d,  $J = 8.7$  Hz, 2H), 6.42 (d,  $J = 8.7$  Hz, 2H), 3.77 (s, 3H), 3.67 (s, 3H), 3.59 (s, 3H);  $^{13}\text{C}$  NMR (75 MHz,  $\text{CDCl}_3$ )  $\delta$  189.77, 163.80, 160.72, 158.86, 140.78, 140.71, 133.15, 131.90, 131.10, 130.40, 129.52, 128.64, 128.09, 126.91, 123.22, 121.62, 113.92, 113.71, 112.95, 55.51, 55.38, 55.04; HRMS for  $\text{C}_{33}\text{H}_{28}\text{N}_2\text{O}_6\text{S}$ : calcd. ( $\text{MH}^+$ ): 581.1741, found: 581.1741

**(Z)-3-(5-(phenylsulfonyl)-4-p-tolyl-1H-pyrazol-3-yl)-1,3-dip-tolylprop-2-en-1-one (3x)**

Yellow solid; isolated yield 30% (32 mg).  $R_f$  0.50 (40% EtOAc/hexane); Mp 184-186 °C;  $^1\text{H}$  NMR (300 MHz,  $\text{CDCl}_3$ )  $\delta$  12.53 (br s, 1H), 7.64 (br d,  $J = 5.7$  Hz, 4H), 7.47 (t,  $J = 7.2$  Hz, 1H), 7.32 (t,  $J = 7.4$  Hz, 2H), 7.15 (d,  $J = 7.9$  Hz, 2H), 7.12 (s, 1H), 7.06, 6.97 (ABq,  $J_{\text{AB}} = 7.7$  Hz, 4H), 6.79, 6.73 (ABq,  $J_{\text{AB}} = 7.6$  Hz, 4H), 2.39 (s, 3H), 2.26 (s, 3H), 2.15 (s, 3H);  $^{13}\text{C}$  NMR (75 MHz,  $\text{CDCl}_3$ )  $\delta$  190.94, 144.32, 141.37, 140.77, 139.80, 137.02, 135.86, 134.76, 133.13, 130.54, 129.12, 128.88, 128.63, 128.12, 128.08, 128.01, 127.76, 126.27, 123.61, 21.73, 21.17, 21.08; HRMS for  $\text{C}_{33}\text{H}_{28}\text{N}_2\text{O}_3\text{S}$ : calcd. ( $\text{MH}^+$ ): 533.1893, found: 533.1892

**(Z)-3-(4-methoxyphenyl)-3-(5-(phenylsulfonyl)-4-(p-tolyl)-1H-pyrazol-3-yl)-1-(p-tolyl)prop-2-en-1-one (3y)**

White solid; isolated yield 58% (64 mg).  $R_f$  0.50 (50% EtOAc/hexane); Mp 218-220 °C;  $^1\text{H}$  NMR (300 MHz,  $\text{CDCl}_3$ )  $\delta$  12.37 (br s, 1H), 7.58 (d,  $J = 7.4$  Hz, 4H), 7.41 (t,  $J = 7.5$  Hz, 1H), 7.26 (t,  $J = 7.6$  Hz, 2H), 7.03-7.09 (m, 5H), 6.74, 6.68 (ABq,  $J_{\text{AB}} = 7.9$  Hz, 4H), 6.62 (d,  $J = 8.5$  Hz, 2H), 3.68 (s, 3H), 2.32 (s, 3H), 2.08 (s, 3H);  $^{13}\text{C}$  NMR (75 MHz,  $\text{CDCl}_3$ )  $\delta$  190.79, 160.81, 144.17, 140.99, 140.72, 137.00, 134.87, 133.11, 131.03, 130.47, 129.52, 129.08, 128.79, 128.61, 128.10, 128.08, 126.68, 126.27, 123.44, 113.91, 55.37, 21.69, 21.06; HRMS for  $\text{C}_{33}\text{H}_{28}\text{N}_2\text{O}_4\text{S}$ : calcd. ( $\text{MH}^+$ ): 549.1843, found: 549.1843

**(Z)-1-(4-chlorophenyl)-3-(4-(4-chlorophenyl)-5-(phenylsulfonyl)-1H-pyrazol-3-yl)-3-(4-methoxyphenyl)prop-2-en-1-one (3z)**

White solid; isolated yield 49% (58 mg).  $R_f$  0.50 (50% EtOAc/hexane); Mp 210-212 °C;  $^1\text{H}$  NMR (400 MHz,  $\text{CDCl}_3$ )  $\delta$  12.17 (br s, 1H), 7.58-7.60 (m, 4H), 7.43-7.47 (m, 1H), 7.26-7.33 (m, 4H), 7.05 (m appearing as d,  $J = 8.8$  Hz, 2H), 7.01 (s, 1H), 6.88, 6.81 (ABq,  $J_{\text{AB}} = 8.5$  Hz,

4H), 6.67 (m appearing as d,  $J = 8.8$  Hz, 2H), 3.71 (s, 3H);  $^{13}\text{C}$  NMR (75 MHz,  $\text{CDCl}_3$ )  $\delta$  189.73, 161.32, 141.61, 140.40, 140.04, 135.50, 133.84, 133.45, 131.91, 130.51, 129.88, 129.60, 128.85, 128.81, 128.06, 127.83, 127.78, 125.82, 122.12, 114.22, 55.48; HRMS for  $\text{C}_{31}\text{H}_{22}\text{Cl}_2\text{N}_2\text{O}_4\text{S}$ : calcd. ( $\text{MH}^+$ ): 589.0750, found: 589.0752

**(Z)-4-(4-methyl-5-(phenylsulfonyl)-1H-pyrazol-3-yl)-4-phenylbut-3-en-2-one (3za)**

White solid; isolated yield 53% (39 mg).  $R_f$  0.50 (40% EtOAc/hexane); Mp 188-191 °C;  $^1\text{H}$  NMR (400 MHz,  $\text{CDCl}_3$ )  $\delta$  13.15 (br s, 1H), 7.93-7.95 (m, 2H), 7.51-7.55 (m, 1H), 7.43-7.47 (m, 2H), 7.30-7.39 (m, 3H), 7.17-7.19 (m merged with solvent peak, 2H), 6.49 (s, 1H), 2.25 (s, 3H), 1.59 (s, 3H);  $^{13}\text{C}$  NMR (100 MHz,  $\text{CDCl}_3$ )  $\delta$  199.25, 141.48, 141.10, 139.12, 133.41, 129.84, 129.11, 129.07, 128.98, 127.97, 127.86, 119.46, 31.15, 9.39; HRMS for  $\text{C}_{20}\text{H}_{18}\text{N}_2\text{O}_3\text{S}$ : calcd. ( $\text{MH}^+$ ): 367.1111, found: 367.1106

**(Z)-4-(4-methyl-5-(phenylsulfonyl)-1H-pyrazol-3-yl)pent-3-en-2-one (3zb; major isomer) & (Z)-4-(4-methyl-3-(phenylsulfonyl)-1H-pyrazol-5-yl)pent-3-en-2-one (3zb; minor isomer)**

**Major isomer:** White solid; isolated yield 24% (15 mg).  $R_f$  0.50 (40% EtOAc/hexane); Mp 136-138 °C;  $^1\text{H}$  NMR (400 MHz,  $\text{CDCl}_3$ )  $\delta$  11.58 (br s, 1H), 7.91 (d,  $J = 7.2$  Hz, 2H), 7.52-7.55 (m, 1H), 7.43-7.47 (m, 2H), 6.33 (s, 1H), 2.37 (s, 3H), 2.26 (s, 3H), 2.19 (s, 3H);  $^{13}\text{C}$  NMR (125 MHz,  $\text{CDCl}_3$ )  $\delta$  198.64, 141.00, 140.84, 133.67, 129.29, 127.67, 127.24, 115.97, 32.21, 17.90, 9.43; HRMS for  $\text{C}_{15}\text{H}_{16}\text{N}_2\text{O}_3\text{S}$ : calcd. ( $\text{MH}^+$ ): 305.0954, found: 305.0956

**Minor-isomer:** Colorless liquid; isolated yield 8% (5 mg).  $R_f$  0.50 (45% EtOAc/hexane);  $^1\text{H}$  NMR (400 MHz,  $\text{CDCl}_3$ )  $\delta$  14.27 (br s, 1H), 7.95 (d,  $J = 5.0$  Hz, 2H), 7.45-7.52 (m, 3H), 6.27 (s, 1H), 2.41 (s, 3H), 2.26 (s, 3H), 2.22 (s, 3H);  $^{13}\text{C}$  NMR (100 MHz,  $\text{CDCl}_3$ )  $\delta$  199.05, 150.60, 141.26, 140.13, 139.34, 133.37, 129.08, 127.86, 127.06, 118.25, 31.60, 25.65, 10.48; HRMS for  $\text{C}_{15}\text{H}_{16}\text{N}_2\text{O}_3\text{S}$ : calcd. ( $\text{MH}^+$ ): 305.0954, found: 305.0952

**(Z)-1,3-diphenyl-3-(4-phenyl-5-tosyl-1H-pyrazol-3-yl)prop-2-en-1-one (3zc)**

White solid; isolated yield 72% (73 mg).  $R_f$  0.50 (40% EtOAc/hexane); Mp 218-220 °C;  $^1\text{H}$  NMR (300 MHz,  $\text{CDCl}_3$ )  $\delta$  12.56 (br s, 1H), 7.77-7.80 (m, 2H), 7.45-7.51 (m, 1H), 7.43 (d,  $J = 8.3$  Hz, 2H), 7.35 (t,  $J = 7.8$  Hz, 2H), 7.03-7.11 (m, 8H), 6.84-6.94 (m, 5H), 2.27 (s, 3H);  $^{13}\text{C}$  NMR (75 MHz,  $\text{CDCl}_3$ )  $\delta$  191.40, 144.18, 142.27, 138.70, 137.57, 137.25, 133.59, 130.75, 129.45, 129.31, 128.78, 128.63, 128.41, 128.32, 128.17, 128.12, 127.43, 127.30, 123.76, 21.56; HRMS for  $\text{C}_{31}\text{H}_{24}\text{N}_2\text{O}_3\text{S}$ : calcd. ( $\text{MH}^+$ ): 505.1580, found: 505.1581

**(Z)-1,3-diphenyl-3-(4-phenyl-5-(trifluoromethyl)-1H-pyrazol-3-yl)prop-2-en-1-one (3zd)**

White solid; isolated yield 39% (33 mg).  $R_f$  0.50 (15% EtOAc/hexane); Mp 148-150 °C;  $^1\text{H}$  NMR (300 MHz,  $\text{CDCl}_3$ )  $\delta$  12.38 (s, 1H), 7.88 (d,  $J = 7.4$  Hz, 2H), 7.57 (t,  $J = 7.2$  Hz, 1H), 7.44 (t,  $J = 7.5$  Hz, 2H), 7.21-7.26 (m merged with solvent peak, 6H), 6.99 (br s, 5H);  $^{13}\text{C}$  NMR (125 MHz,  $\text{CDCl}_3$ )  $\delta$  191.47, 141.71, 139.12, 138.73, 137.14, 133.55, 129.90, 129.86, 129.70, 128.74, 128.58, 128.50, 128.38, 128.09, 127.69, 127.30, 122.22, 121.44 (q,  $J_{\text{C-F}} = 268.8$  Hz);  $^{19}\text{F}$  NMR (282 MHz,  $\text{CDCl}_3$ )  $\delta$  -59.45 (s); HRMS for  $\text{C}_{25}\text{H}_{17}\text{F}_3\text{N}_2\text{O}$ : calcd. ( $\text{MH}^+$ ): 419.1366, found: 419.1359

**(Z)-3-(4-methoxyphenyl)-1-phenyl-3-(4-phenyl-5-(trifluoromethyl)-1H-pyrazol-3-yl)prop-2-en-1-one (3ze)**

Yellow solid; isolated yield 35% (31 mg).  $R_f$  0.50 (25% EtOAc/hexane); Mp 136-138 °C;  $^1\text{H}$  NMR (300 MHz,  $\text{CDCl}_3$ ): (major/minor in 1:0.33 ratio)  $\delta$  12.15 (br s, 1H), 7.76 (d,  $J = 7.4$  Hz, 2H, major), 7.49-7.54 (m, 2H), 7.35-7.46 (m, 6H), 7.19-7.29 (m, 7H), 7.01 (br s, 7H), 6.77-6.83 (m, 3H, minor), 6.73 (d,  $J = 8.6$  Hz, 2H, major), 6.61-6.66 (m, 1H, minor), 3.76 (s, 3H, major), 3.74 (s, 3H, minor);  $^{13}\text{C}$  NMR (75 MHz,  $\text{CDCl}_3$ )  $\delta$  191.38, 191.23, 161.02, 160.46, 141.27, 139.39, 139.28, 137.41, 133.29, 133.01, 130.98, 130.94, 130.47, 130.13, 129.95, 129.81, 129.56, 128.85, 128.60, 128.52, 128.48, 128.35, 128.24, 127.71, 127.36, 127.26, 126.48, 126.32, 121.93, 120.46, 119.67 (q appearing as t,  $J_{\text{C-F}} = 268.2$  Hz), 114.03, 113.98, 55.39, 55.24;  $^{19}\text{F}$  NMR (376 MHz,  $\text{CDCl}_3$ ): (major/minor in 1:0.34 ratio)  $\delta$  -59.42 (s, major), -59.97 (s, minor); HRMS for  $\text{C}_{26}\text{H}_{19}\text{F}_3\text{N}_2\text{O}_2$ : calcd. ( $\text{MH}^+$ ): 449.1471, found: 449.1466

**4-Phenyl-3-(1-phenyl-1H-inden-1-yl)-5-(phenylsulfonyl)-1H-pyrazole (4a)**

White fluffy solid; isolated yield 94% (45 mg).  $R_f$  0.50 (50% EtOAc/hexane); Mp 80-82 °C;  $^1\text{H}$  NMR (300 MHz,  $\text{CDCl}_3$ )  $\delta$  12.10 (br s, 1H), 7.68 (d,  $J = 7.6$  Hz, 2H), 7.52 (t,  $J = 7.4$  Hz, 1H), 7.34 (t,  $J = 7.8$  Hz, 2H), 7.24-7.26 (m merged with solvent peak, 2H), 7.13-7.19 (m, 7H), 7.02-7.11 (m, 5H), 6.30 (d,  $J = 9.1$  Hz, 1H), 5.16 (d,  $J = 9.1$  Hz, 1H);  $^{13}\text{C}$  NMR (75 MHz,  $\text{CDCl}_3$ )  $\delta$  148.78, 141.76, 141.49, 140.33, 138.43, 136.20, 133.43, 131.18, 130.30, 129.17, 128.81, 128.56, 128.35, 128.30, 128.02, 127.92, 127.84, 127.78, 126.90, 125.90, 122.22, 71.38; HRMS for  $\text{C}_{30}\text{H}_{22}\text{N}_2\text{O}_2\text{S}$ : calcd. ( $\text{MH}^+$ ): 475.1475, found: 475.1470

**4-Phenyl-5-(phenylsulfonyl)-3-(1-(p-tolyl)-1H-inden-1-yl)-1H-pyrazole (4b)**

White fluffy solid; isolated yield 94% (46 mg).  $R_f$  0.50 (50% EtOAc/hexane); Mp 106-108 °C;  $^1\text{H}$  NMR (300 MHz,  $\text{CDCl}_3$ )  $\delta$  7.71 (d,  $J = 7.6$  Hz, 2H), 7.53 (t,  $J = 7.5$  Hz, 1H), 7.36 (t,  $J = 7.7$  Hz, 2H), 7.12-7.24 (m merged with solvent peak, 9H), 6.96 (s, 4H), 6.26 (d,  $J = 9.2$  Hz, 1H), 5.10 (d,  $J = 9.2$  Hz, 1H), 2.25 (s, 3H);  $^{13}\text{C}$  NMR (75 MHz,  $\text{CDCl}_3$ )  $\delta$  141.83, 140.44, 138.35, 135.63, 135.22, 133.43, 131.41, 130.80, 130.32, 129.30, 129.13, 128.82, 128.53, 128.07, 127.92, 127.72, 127.63, 127.42, 127.35, 126.93, 126.72, 125.88, 122.11, 71.42, 21.10; HRMS for  $\text{C}_{31}\text{H}_{24}\text{N}_2\text{O}_2\text{S}$ : calcd. ( $\text{MH}^+$ ): 489.1631, found: 489.1630

**3-(1-(4-Methoxyphenyl)-1H-inden-1-yl)-4-phenyl-5-(phenylsulfonyl)-1H-pyrazole (4c)**

White fluffy solid; isolated yield 90% (45 mg).  $R_f$  0.50 (60% EtOAc/hexane); Mp 91-93 °C;  $^1\text{H}$  NMR (300 MHz,  $\text{CDCl}_3$ )  $\delta$  12.16 (br s, 1H), 7.69 (d,  $J = 7.5$  Hz, 2H), 7.52 (t,  $J = 7.4$  Hz, 1H), 7.35 (t,  $J = 7.8$  Hz, 2H), 7.09-7.24 (m merged with solvent peak, 10H), 6.98 (d,  $J = 8.7$  Hz, 2H), 6.67 (d,  $J = 8.7$  Hz, 2H), 6.20 (d,  $J = 9.1$  Hz, 1H), 5.10 (d,  $J = 9.2$  Hz, 1H), 3.72 (s, 3H);  $^{13}\text{C}$  NMR (125 MHz,  $\text{CDCl}_3$ )  $\delta$  159.71, 148.82, 141.98, 141.57, 140.44, 134.24, 133.40, 131.00, 130.49, 130.29, 129.29, 128.80, 128.51, 128.09, 128.03, 127.92, 127.88, 127.67, 125.89, 122.10, 113.81, 71.50, 55.26; HRMS for  $\text{C}_{31}\text{H}_{24}\text{N}_2\text{O}_3\text{S}$ : calcd. ( $\text{MH}^+$ ): 505.1580, found: 505.1573

### 3-(6-Methoxy-1-(p-tolyl)-1H-inden-1-yl)-4-(4-methoxyphenyl)-5-(phenylsulfonyl)-1H-pyrazole (4d)

White fluffy solid; isolated yield 92% (50 mg).  $R_f$  0.50 (60% EtOAc/hexane); Mp 104-108 °C;  $^1\text{H}$  NMR (300 MHz,  $\text{CDCl}_3$ )  $\delta$  7.72-7.75 (m, 2H), 7.51-7.56 (m, 1H), 7.36-7.41 (m, 2H), 7.04-7.08 (m, 3H), 6.97 (s, 4H), 6.77-6.80 (m, 2H), 6.67-6.70 (m, 2H), 6.28 (d,  $J = 9.2$  Hz, 1H), 5.03 (d,  $J = 9.2$  Hz, 1H), 3.77 (s, 3H), 3.75(s, 3H), 2.26 (s, 3H);  $^{13}\text{C}$  NMR (75 MHz,  $\text{CDCl}_3$ )  $\delta$  159.30, 159.23, 148.87, 141.33, 140.54, 138.34, 135.59, 135.16, 134.05, 133.40, 131.47, 130.53, 129.15, 128.80, 128.11, 127.23, 126.69, 121.84, 121.40, 113.98, 113.44, 71.14, 55.28, 55.17, 21.08; HRMS for  $\text{C}_{33}\text{H}_{28}\text{N}_2\text{O}_4\text{S}$ : calcd. ( $\text{MH}^+$ ): 549.1843, found: 549.1839

## 7. Copies of $^1\text{H}$ , $^{13}\text{C}$ , $^{31}\text{P}$ & $^{19}\text{F}$ NMR Spectra

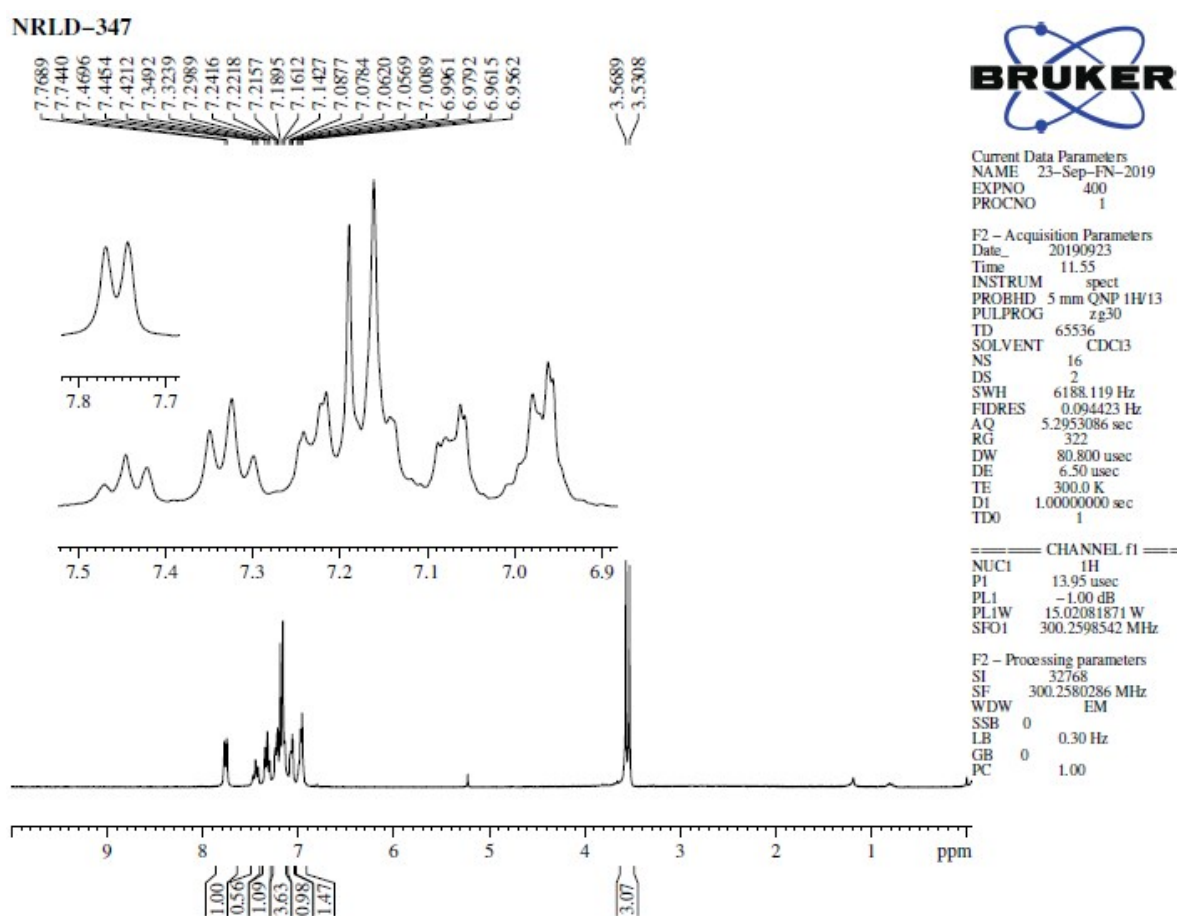

S1:  $^1\text{H}$  NMR spectrum of **3a**

NRLD-347

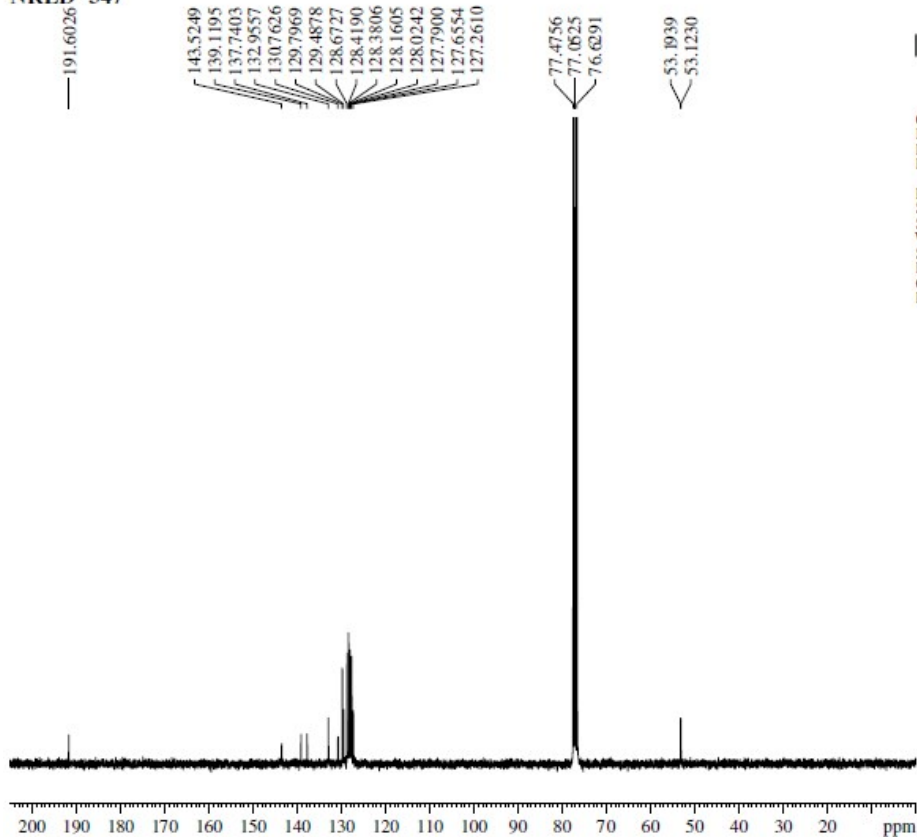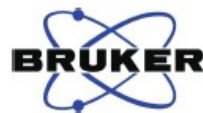

Current Data Parameters  
NAME 28-Aug-FN-2019  
EXPNO 570  
PROCNO 1

F2 - Processing parameters  
SI 32768  
SF 75.4999324 MHz  
WDW EM  
SSB 0  
LB 1.00 Hz  
GB 0  
PC 1.40

S2: <sup>13</sup>C NMR spectrum of 3a

NRLD-347

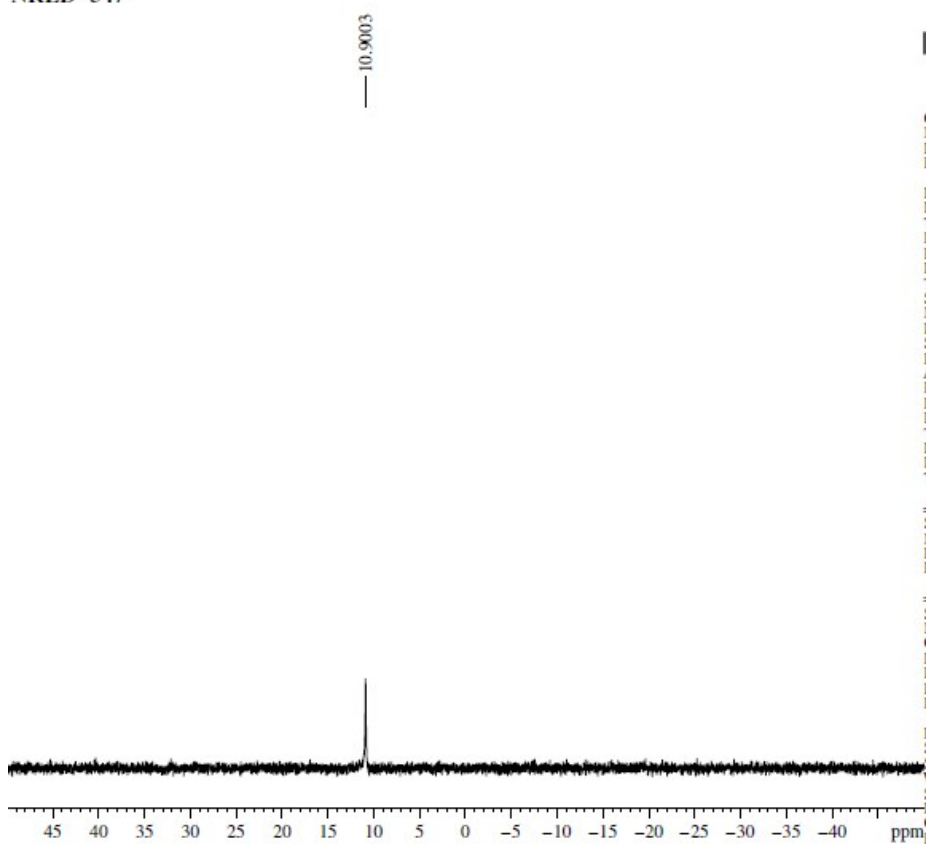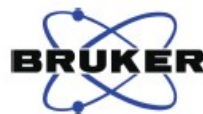

Current Data Parameters  
NAME 24-Dec-AN-2019  
EXPNO 320  
PROCNO 1

F2 - Acquisition Parameters  
Date\_ 20191224  
Time 22.08  
INSTRUM spect  
PROBHD 5 mm PABBO BB/  
PULPROG zgpg30  
TD 65536  
SOLVENT CDCl3  
NS 16  
DS 4  
SWH 64102.563 Hz  
FIDRES 0.978127 Hz  
AQ 0.5111808 sec  
RG 201.48  
DW 7.800 usec  
DE 6.50 usec  
TE 303.1 K  
D1 2.0000000 sec  
D11 0.0300000 sec  
TD0 1

==== CHANNEL f1 ====  
SFO1 161.9798402 MHz  
NUC1 31P  
P1 15.00 usec  
PLW1 12.0000000 W

==== CHANNEL f2 ====  
SFO2 400.1621006 MHz  
NUC2 1H  
CPDPRG2 waltz16  
PCPD2 90.00 usec  
PLW2 13.0000000 W  
PLW12 0.27963999 W  
PLW13 0.22651000 W

F2 - Processing parameters  
SI 32768  
SF 161.9879400 MHz  
WDW EM  
SSB 0  
LB 1.00 Hz  
GB 0  
PC 1.40

S3: <sup>31</sup>P NMR spectrum of 3a

NRLD-412

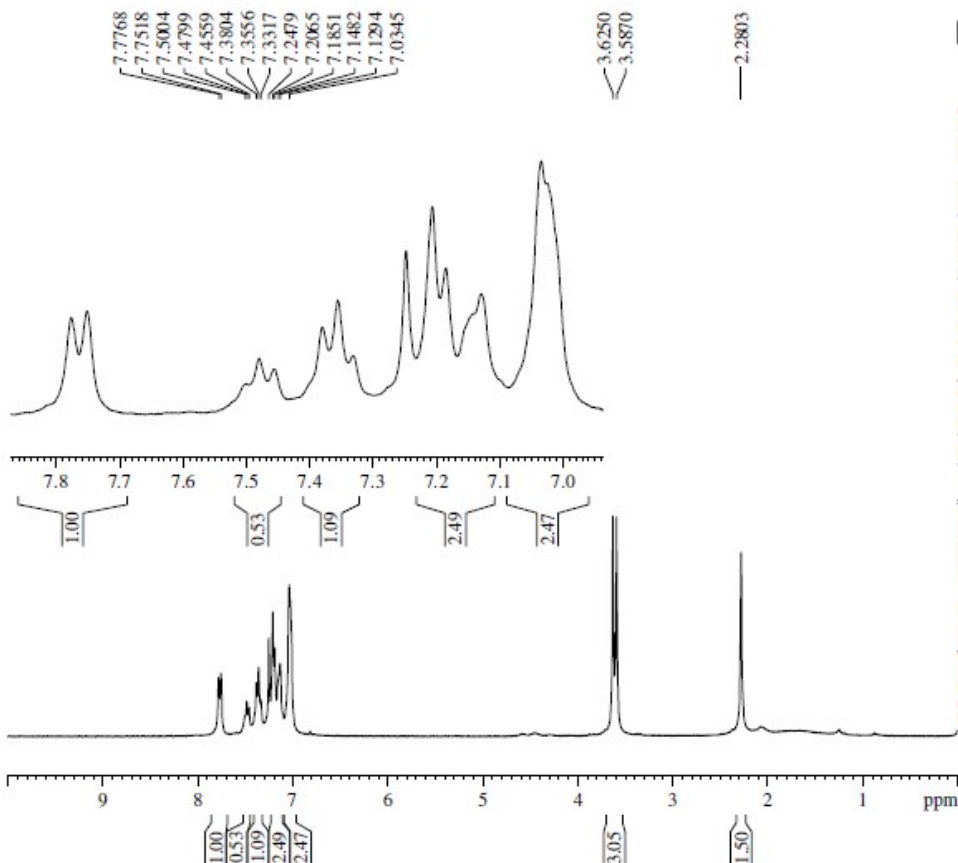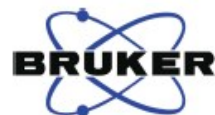

Current Data Parameters  
NAME 01-July-AN-2020  
EXPNO 360  
PROCNO 1

F2 - Acquisition Parameters  
Date\_ 20200701  
Time 16.05  
INSTRUM spect  
PROBHD 5 mm QNP 1H/13  
PULPROG zg30  
TD 65536  
SOLVENT CDCl3  
NS 16  
DS 2  
SWH 6188.119 Hz  
FIDRES 0.094423 Hz  
AQ 5.2953086 sec  
RG 287  
DW 80.800 usec  
DE 6.50 usec  
TE 300.0 K  
D1 1.0000000 sec  
TDO 1

==== CHANNEL f1 ====  
NUC1 1H  
P1 13.95 usec  
PL1 -1.00 dB  
PL1W 15.02081871 W  
SFO1 300.2598542 MHz

F2 - Processing parameters  
SI 32768  
SF 300.2580111 MHz  
WDW EM  
SSB 0  
LB 0.30 Hz  
GB 0  
PC 1.00

S4: <sup>1</sup>H NMR spectrum of 3b

NRLD-412

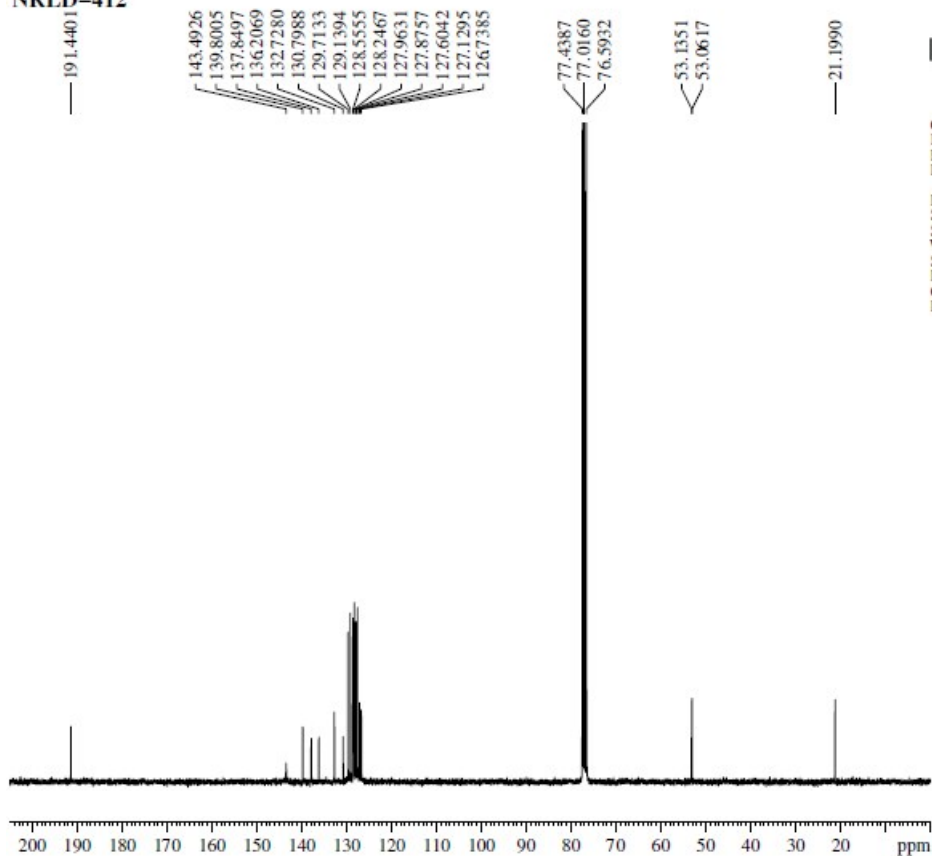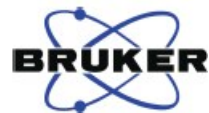

Current Data Parameters  
NAME 07-Feb-AN-2020  
EXPNO 440  
PROCNO 1

F2 - Processing parameters  
SI 32768  
SF 75.4999359 MHz  
WDW EM  
SSB 0  
LB 1.00 Hz  
GB 0  
PC 1.40

S5: <sup>13</sup>C NMR spectrum of 3b



NRLD-412

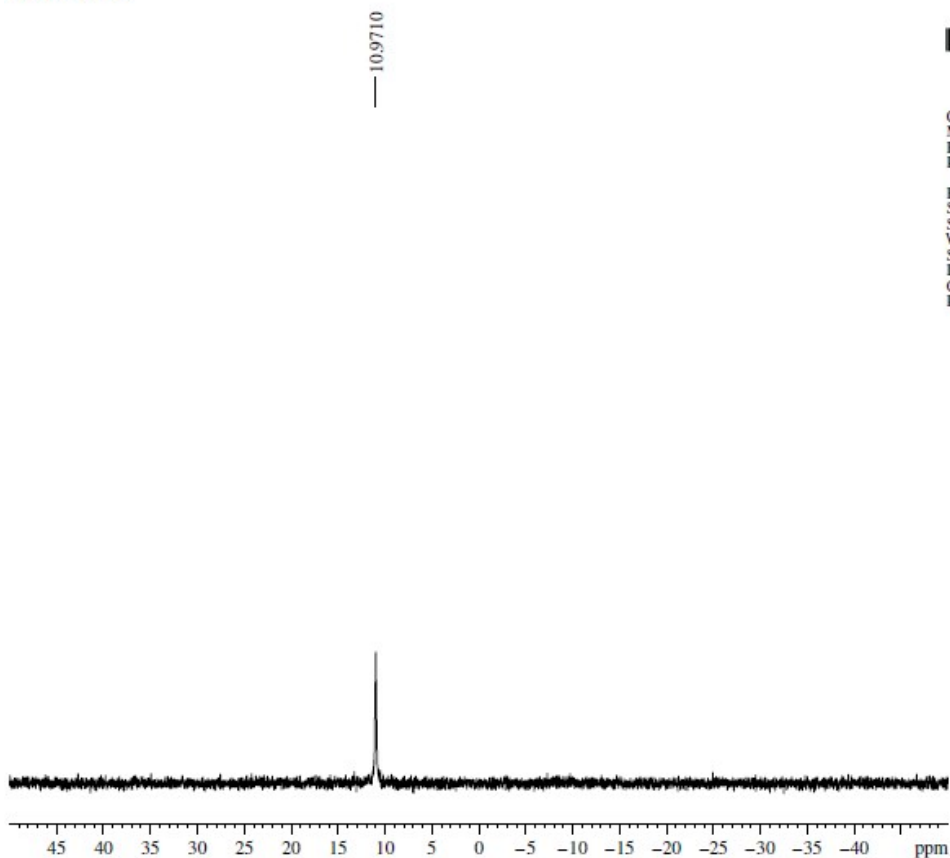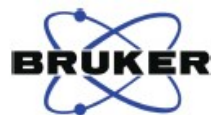

Current Data Parameters  
NAME 07-Feb-AN-2020  
EXPNO 430  
PROCNO 1

F2 - Processing parameters  
SI 32768  
SF 121.5466660 MHz  
WDW EM  
SSB 0  
LB 1.00 Hz  
GB 0  
PC 1.40

S6: <sup>31</sup>P NMR spectrum of 3b

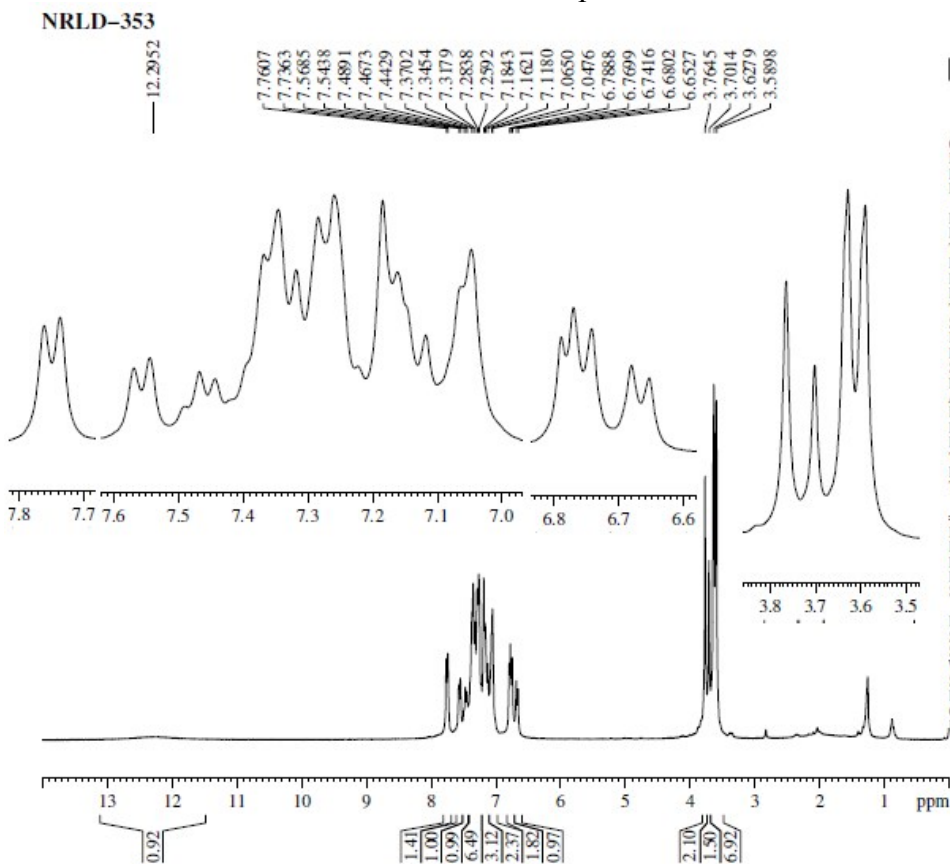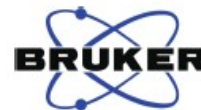

Current Data Parameters  
NAME 30-Sept-FN-2019  
EXPNO 430  
PROCNO 1

F2 - Acquisition Parameters  
Date\_ 20190930  
Time 11.11  
INSTRUM spect  
PROBHD 5 mm QNP 1H/13  
PULPROG zg30  
TD 65536  
SOLVENT CDCl3  
NS 16  
DS 2  
SWH 6188.119 Hz  
FIDRES 0.094423 Hz  
AQ 5.2953086 sec  
RG 181  
DW 80.800 usec  
DE 6.50 usec  
TE 300.0 K  
D1 1.0000000 sec  
TD0 1

==== CHANNEL f1 ====  
NUC1 1H  
P1 13.95 usec  
PL1 -1.00 dB  
PL1W 15.02081871 W  
SFO1 300.2598542 MHz

F2 - Processing parameters  
SI 32768  
SF 300.2580071 MHz  
WDW EM  
SSB 0  
LB 0.30 Hz  
GB 0  
PC 1.00

S7: <sup>1</sup>H NMR spectrum of 3c

NRLD-353

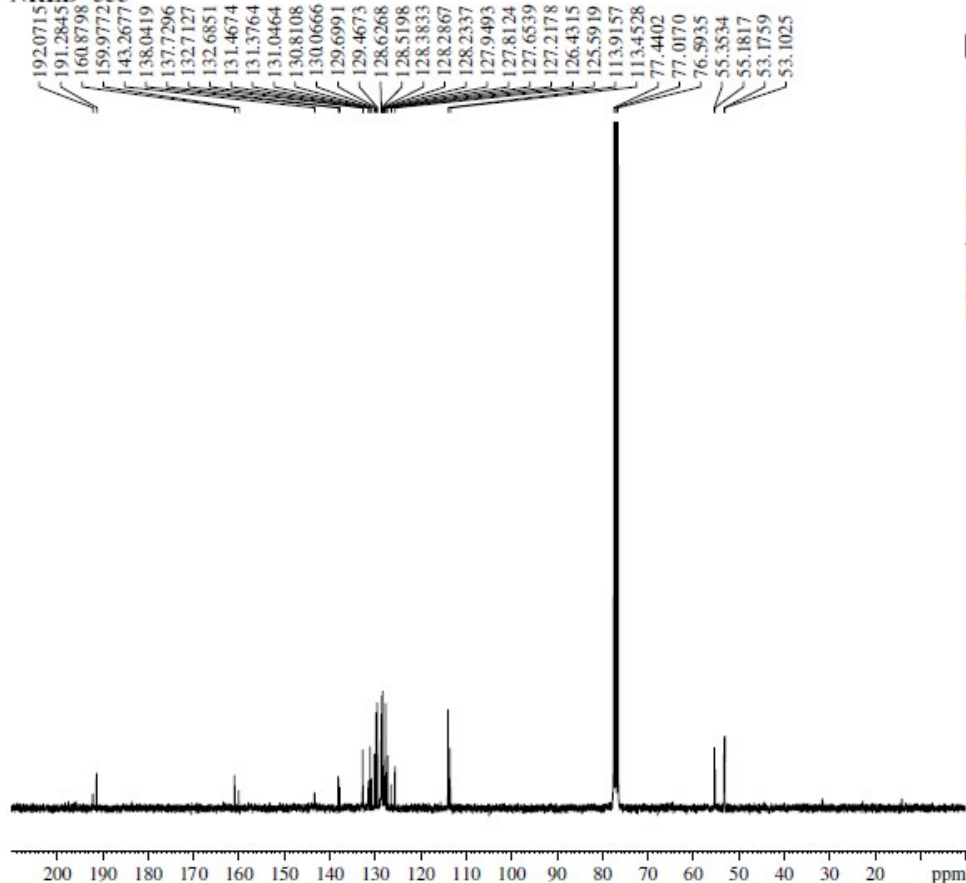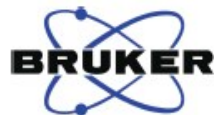

Current Data Parameters  
NAME 10-Oct-FN-2019  
EXPNO 490  
PROCNO 1

F2 - Processing parameters  
SI 32768  
SF 75.4999349 MHz  
WDW EM  
SSB 0  
LB 1.00 Hz  
GB 0  
PC 1.40

S8: <sup>13</sup>C NMR spectrum of 3c

NRLD-353

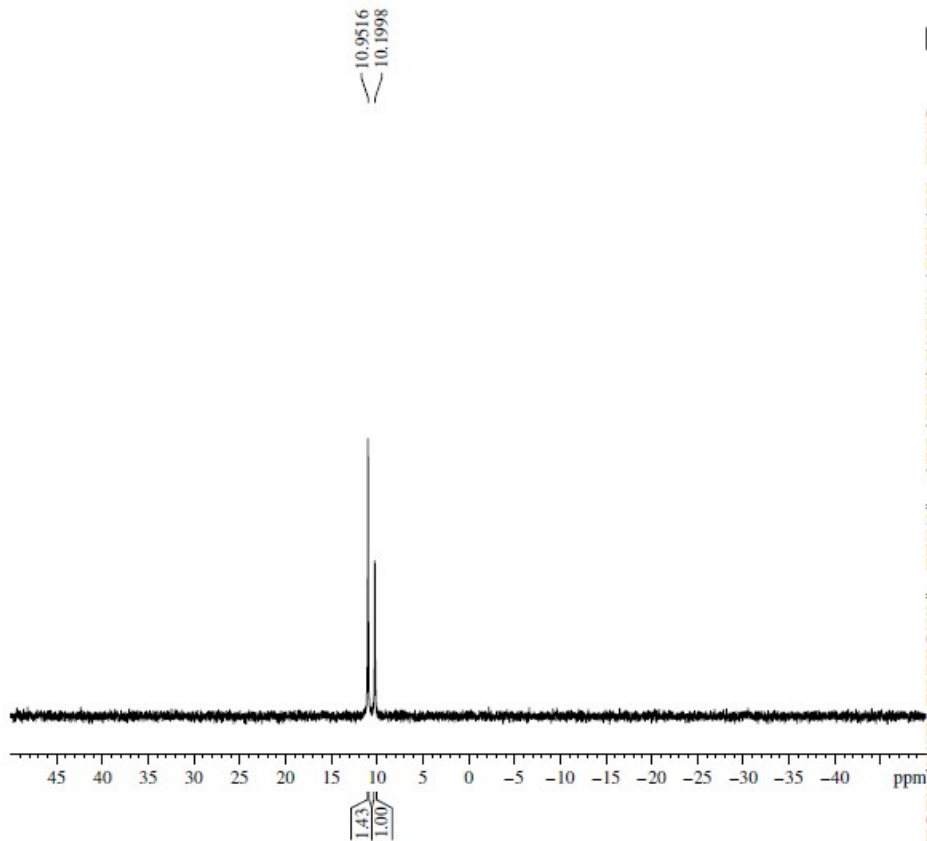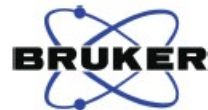

Current Data Parameters  
NAME 23-Dec-AN-2019  
EXPNO 340  
PROCNO 1

F2 - Acquisition Parameters  
Date\_ 20191223  
Time 22.46  
INSTRUM spect  
PROBHD 5 mm PABBO BB/  
PULPROG zpg30  
TD 65536  
SOLVENT CDCl3  
NS 16  
DS 4  
SWH 64102.563 Hz  
FIDRES 0.978127 Hz  
AQ 0.5111808 sec  
RG 201.48  
DW 7.800 usec  
DE 6.50 usec  
TE 303.1 K  
D1 2.0000000 sec  
D11 0.0300000 sec  
TD0 1

==== CHANNEL f1 ====  
SFO1 161.9798402 MHz  
NUC1 31P  
P1 15.00 usec  
PLW1 12.0000000 W

==== CHANNEL f2 ====  
SFO2 400.1621006 MHz  
NUC2 1H  
CPDPRG2 waltz16  
PCPD2 90.00 usec  
PLW2 13.0000000 W  
PLW12 0.27963999 W  
PLW13 0.22651000 W

F2 - Processing parameters  
SI 32768  
SF 161.9879400 MHz  
WDW EM  
SSB 0  
LB 1.00 Hz  
GB 0  
PC 1.40

S9: <sup>31</sup>P NMR spectrum of 3c

NRLD 377

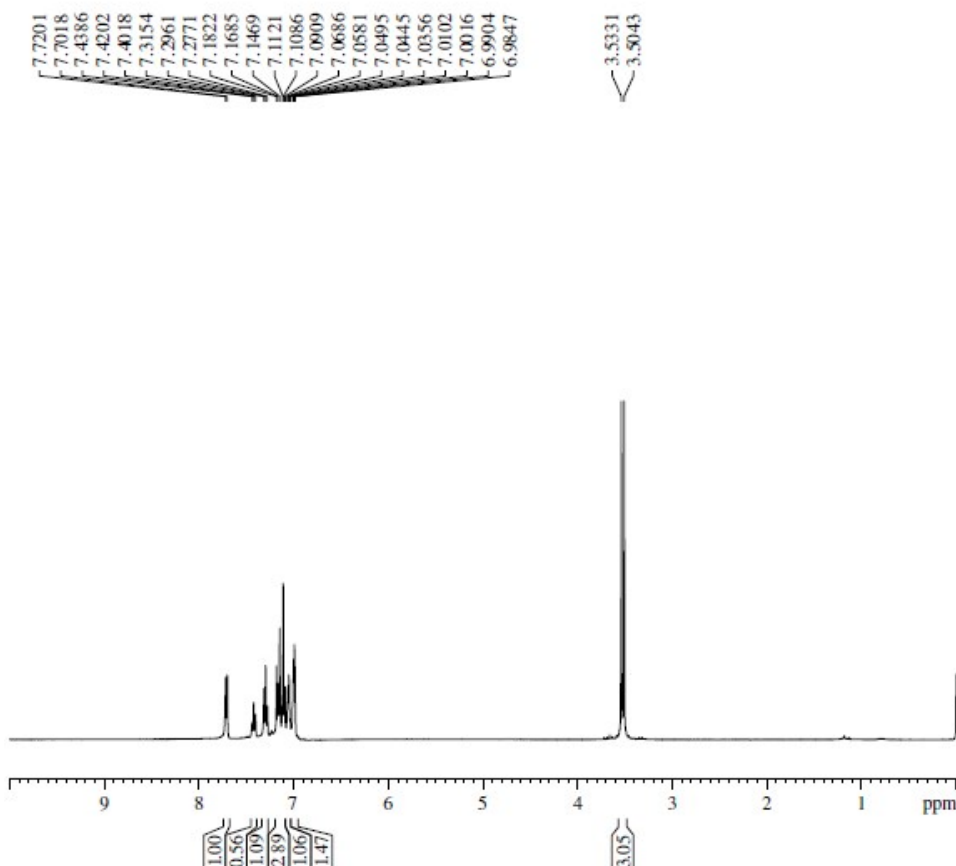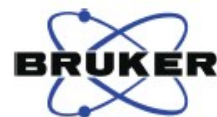

Current Data Parameters  
 NAME 30-Oct-FN-2019  
 EXPNO 390  
 PROCNO 1

F2 - Acquisition Parameters  
 Date\_ 20191030  
 Time 16.13  
 INSTRUM spect  
 PROBHD 5 mm PABBO BB/  
 PULPROG zg30  
 TD 65536  
 SOLVENT CDCl3  
 NS 32  
 DS 0  
 SWH 9615.385 Hz  
 FIDRES 0.146719 Hz  
 AQ 3.4078720 sec  
 RG 129.57  
 DW 52.000 usec  
 DE 6.50 usec  
 TE 300.0 K  
 D1 1.00000000 sec  
 TDO 1

==== CHANNEL f1 ====  
 SFO1 400.1629712 MHz  
 NUC1 1H  
 P1 13.20 usec  
 PLW1 13.00000000 W

F2 - Processing parameters  
 SI 65536  
 SF 400.1605409 MHz  
 WDW EM  
 SSB 0  
 LB 0.30 Hz  
 GB 0  
 PC 1.00

S10: <sup>1</sup>H NMR spectrum of 3d

NRLD 377

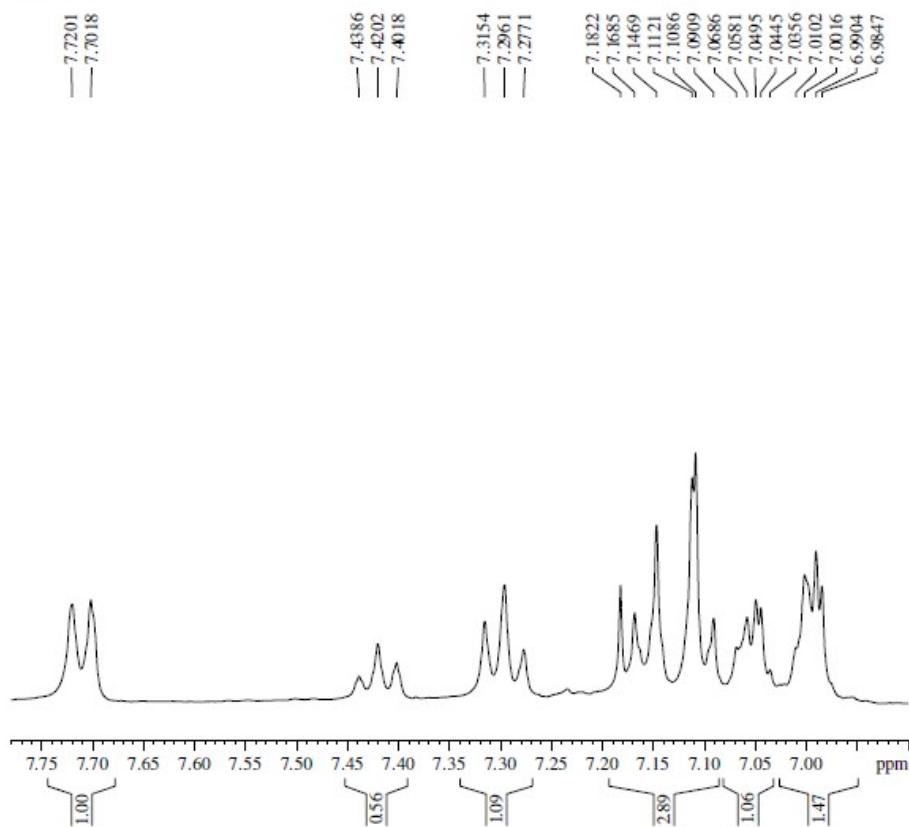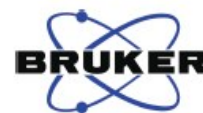

Current Data Parameters  
 NAME 30-Oct-FN-2019  
 EXPNO 390  
 PROCNO 1

F2 - Acquisition Parameters  
 Date\_ 20191030  
 Time 16.13  
 INSTRUM spect  
 PROBHD 5 mm PABBO BB/  
 PULPROG zg30  
 TD 65536  
 SOLVENT CDCl3  
 NS 32  
 DS 0  
 SWH 9615.385 Hz  
 FIDRES 0.146719 Hz  
 AQ 3.4078720 sec  
 RG 129.57  
 DW 52.000 usec  
 DE 6.50 usec  
 TE 300.0 K  
 D1 1.00000000 sec  
 TDO 1

==== CHANNEL f1 ====  
 SFO1 400.1629712 MHz  
 NUC1 1H  
 P1 13.20 usec  
 PLW1 13.00000000 W

F2 - Processing parameters  
 SI 65536  
 SF 400.1605409 MHz  
 WDW EM  
 SSB 0  
 LB 0.30 Hz  
 GB 0  
 PC 1.00

S11: <sup>1</sup>H NMR spectrum of 3d (expansion)

NRLD-377

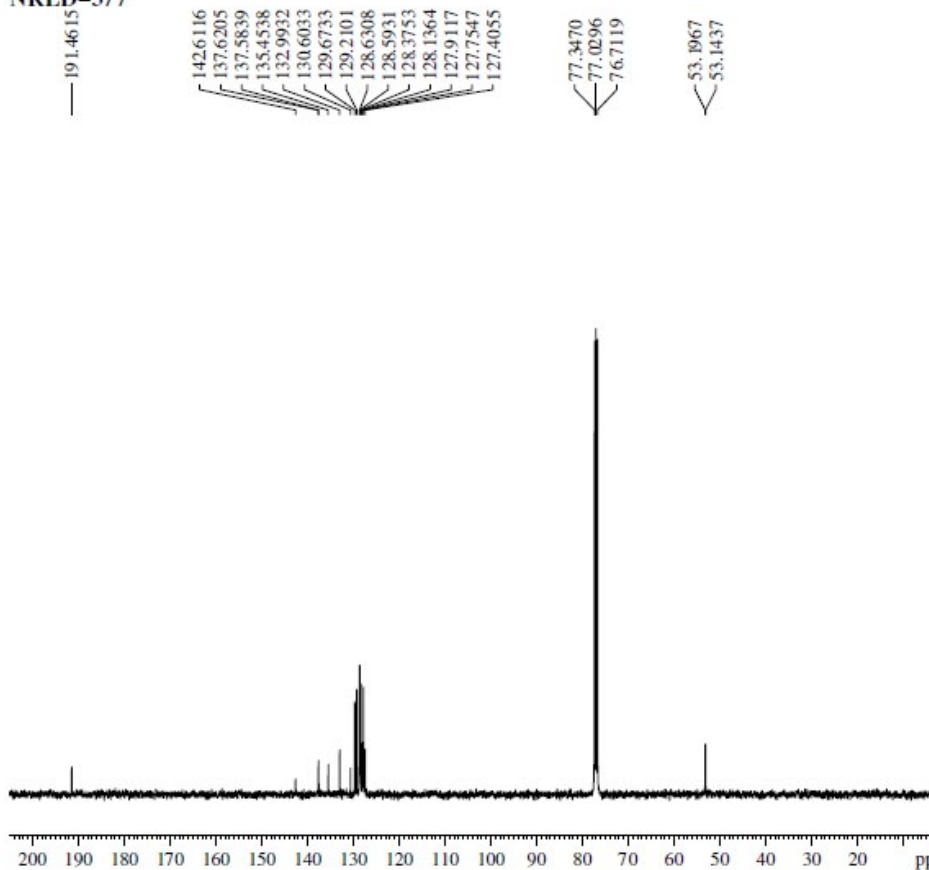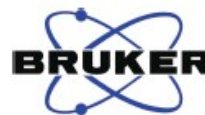

Current Data Parameters  
 NAME 30-Oct-FN-2019  
 EXPNO 310  
 PROCNO 1

F2 - Acquisition Parameters  
 Date\_ 20191031  
 Time 13.52  
 INSTRUM spect  
 PROBHD 5 mm PABBO BB/  
 PULPROG zgpg30  
 TD 65536  
 SOLVENT CDCl3  
 NS 4096  
 DS 4  
 SWH 24038.461 Hz  
 FIDRES 0.366798 Hz  
 AQ 1.3631488 sec  
 RG 201.48  
 DW 20.800 usec  
 DE 6.50 usec  
 TE 300.2 K  
 D1 2.0000000 sec  
 D11 0.0300000 sec  
 TDO 1

==== CHANNEL f1 ====  
 SFO1 100.6304993 MHz  
 NUC1 13C  
 P1 9.90 usec  
 PLW1 53.0000000 W

==== CHANNEL f2 ====  
 SFO2 400.1621006 MHz  
 NUC2 1H  
 CPDPRG2 waltz16  
 PCPD2 90.00 usec  
 PLW2 13.0000000 W  
 PLW12 0.27963999 W  
 PLW13 0.22651000 W

F2 - Processing parameters  
 SI 32768  
 SF 100.6204380 MHz  
 WDW EM  
 SSB 0  
 LB 3.00 Hz  
 GB 0  
 PC 1.40

S12: 13C NMR spectrum of 3d

NRLD 377

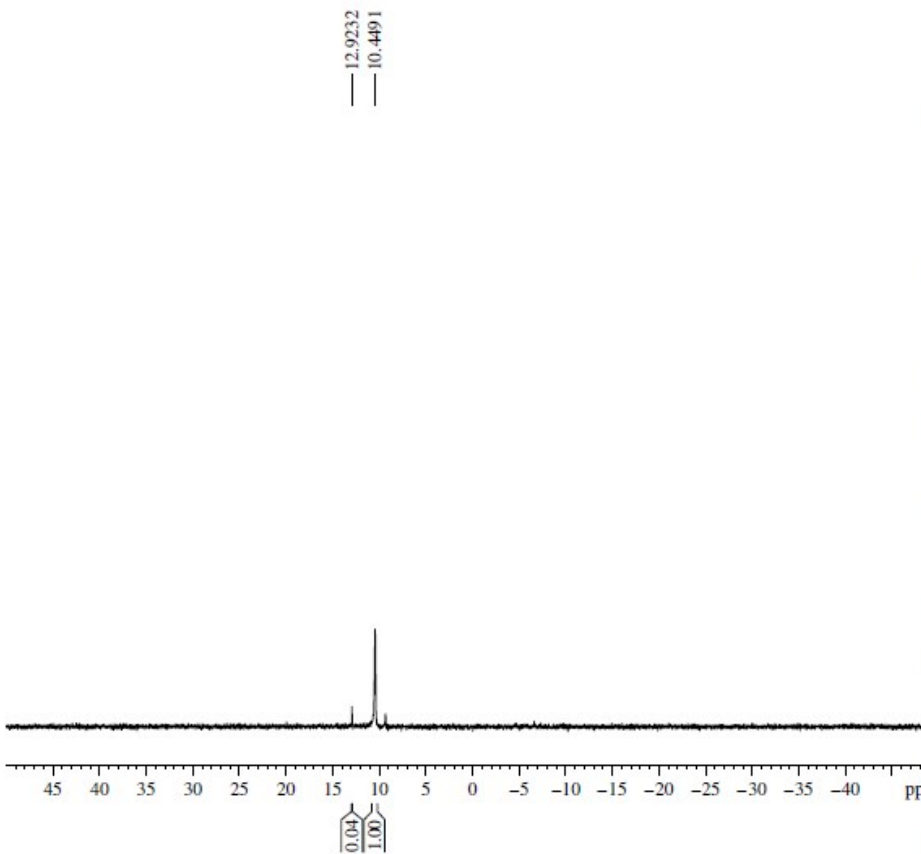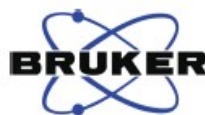

Current Data Parameters  
 NAME 10-July-FN-2020  
 EXPNO 570  
 PROCNO 1

F2 - Acquisition Parameters  
 Date\_ 20200710  
 Time 19.38  
 INSTRUM spect  
 PROBHD 5 mm PABBO BB/  
 PULPROG zgpg30  
 TD 65536  
 SOLVENT CDCl3  
 NS 32  
 DS 4  
 SWH 64102.563 Hz  
 FIDRES 0.978127 Hz  
 AQ 0.5111808 sec  
 RG 201.48  
 DW 7.800 usec  
 DE 6.50 usec  
 TE 303.1 K  
 D1 2.0000000 sec  
 D11 0.0300000 sec  
 TDO 1

==== CHANNEL f1 ====  
 SFO1 161.9798402 MHz  
 NUC1 31P  
 P1 15.00 usec  
 PLW1 12.0000000 W

==== CHANNEL f2 ====  
 SFO2 400.1621006 MHz  
 NUC2 1H  
 CPDPRG2 waltz16  
 PCPD2 90.00 usec  
 PLW2 13.0000000 W  
 PLW12 0.27963999 W  
 PLW13 0.22651000 W

F2 - Processing parameters  
 SI 32768  
 SF 161.9879400 MHz  
 WDW EM  
 SSB 0  
 LB 1.00 Hz  
 GB 0  
 PC 1.40

S13: 31P NMR spectrum of 3d

NRLD-401

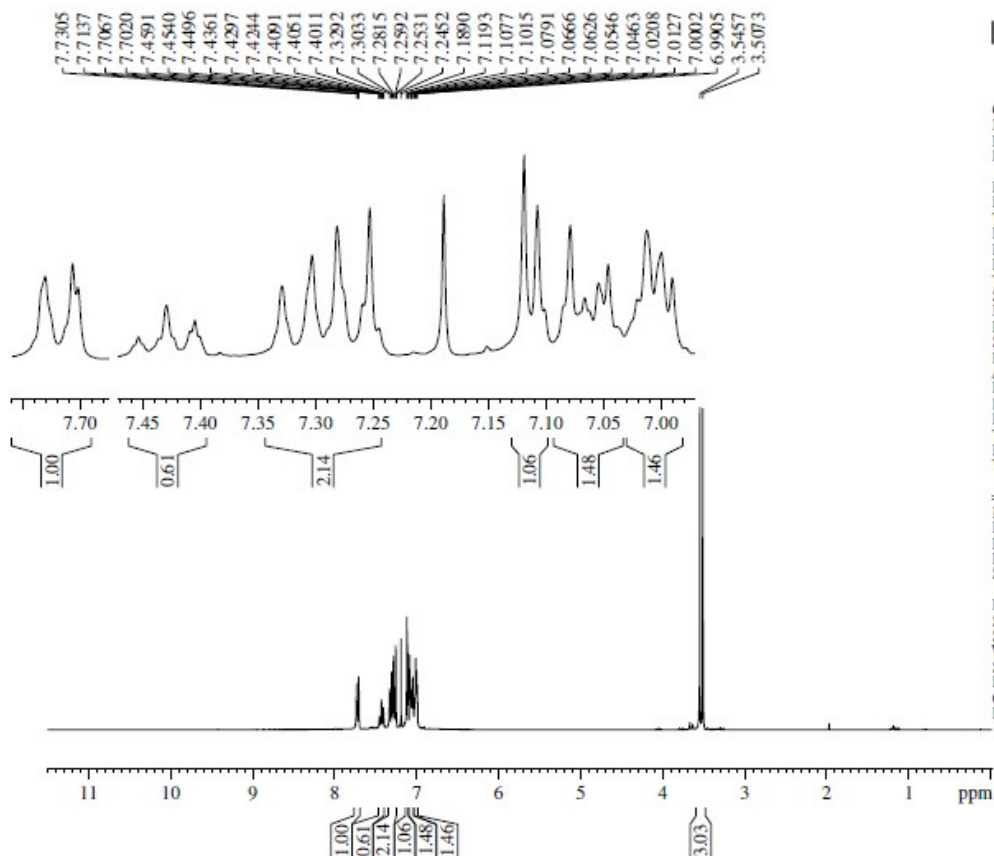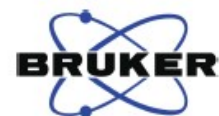

Current Data Parameters  
NAME 24-Jan-FN-2020  
EXPNO 540  
PROCNO 1

F2 - Acquisition Parameters  
Date\_ 20200124  
Time 12.15  
INSTRUM spect  
PROBHD 5 mm QNP 1H/13  
PULPROG zg30  
TD 65536  
SOLVENT CDCl3  
NS 16  
DS 2  
SWH 6188.119 Hz  
FIDRES 0.094423 Hz  
AQ 5.2953086 sec  
RG 256  
DW 80.800 usec  
DE 6.50 usec  
TE 300.0 K  
D1 1.00000000 sec  
TD0 1

==== CHANNEL f1 ====  
NUC1 1H  
P1 13.95 usec  
PL1 -1.00 dB  
PL1W 15.02081871 W  
SFO1 300.2598542 MHz

F2 - Processing parameters  
SI 32768  
SF 300.2580287 MHz  
WDW EM  
SSB 0  
LB 0.30 Hz  
GB 0  
PC 1.00

S14: <sup>1</sup>H NMR spectrum of 3e

NRLD-401

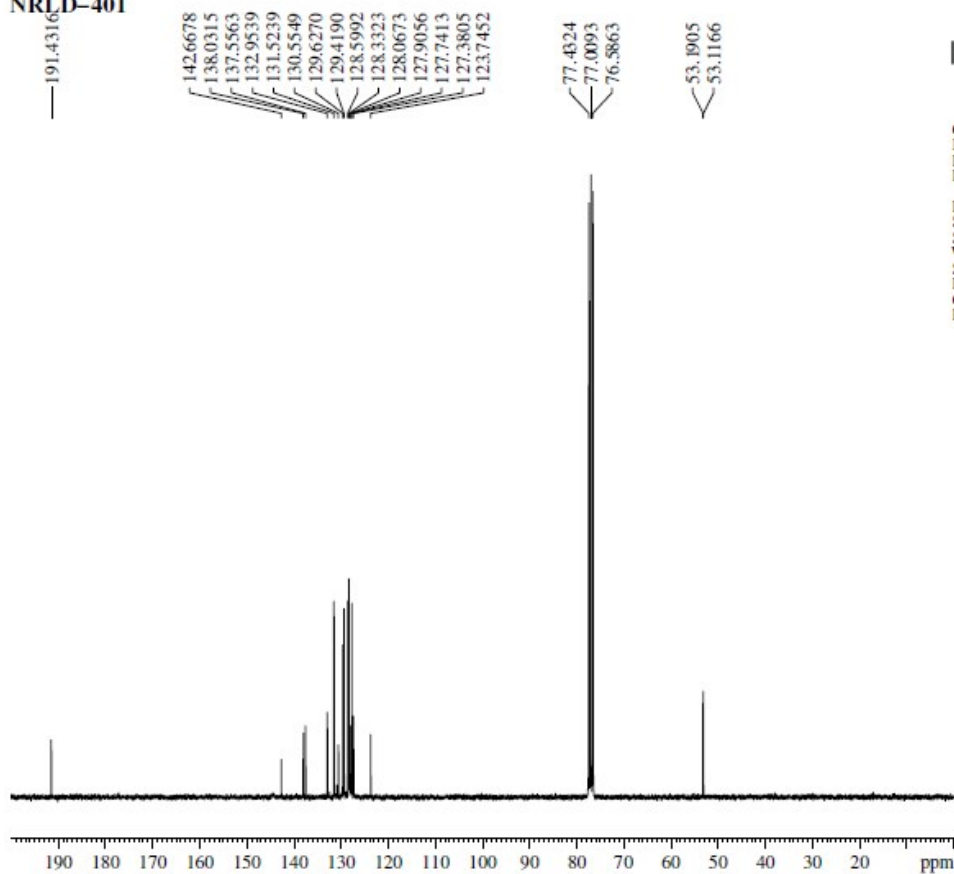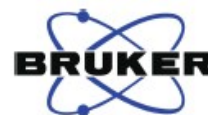

Current Data Parameters  
NAME 24-Jan-FN-2020  
EXPNO 550  
PROCNO 1

F2 - Processing parameters  
SI 32768  
SF 75.4999369 MHz  
WDW EM  
SSB 0  
LB 1.00 Hz  
GB 0  
PC 1.40

S15: <sup>13</sup>C NMR spectrum of 3e



NRLD-401

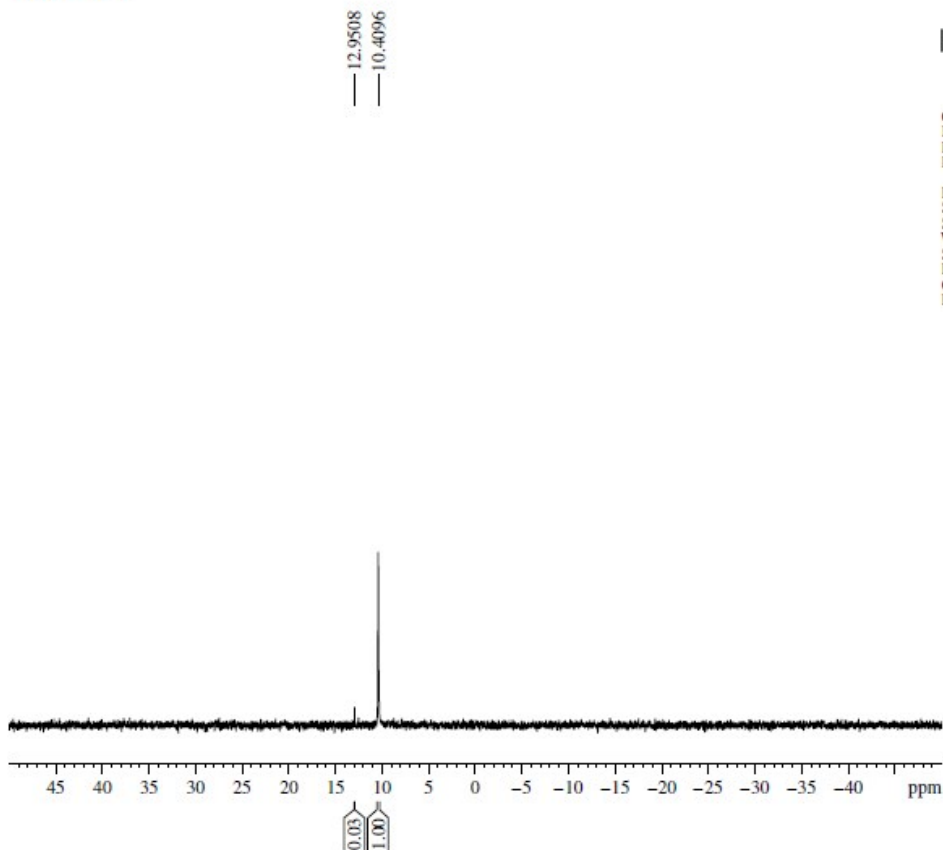

S16: <sup>31</sup>P NMR spectrum of 3e

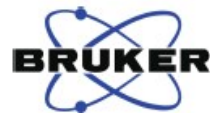

Current Data Parameters  
NAME 24-Jan-FN-2020  
EXPNO 580  
PROCNO 1

F2 - Processing parameters  
SI 32768  
SF 121.5466660 MHz  
WDW EM  
SSB 0  
LB 1.00 Hz  
GB 0  
PC 1.40

NRLD-410

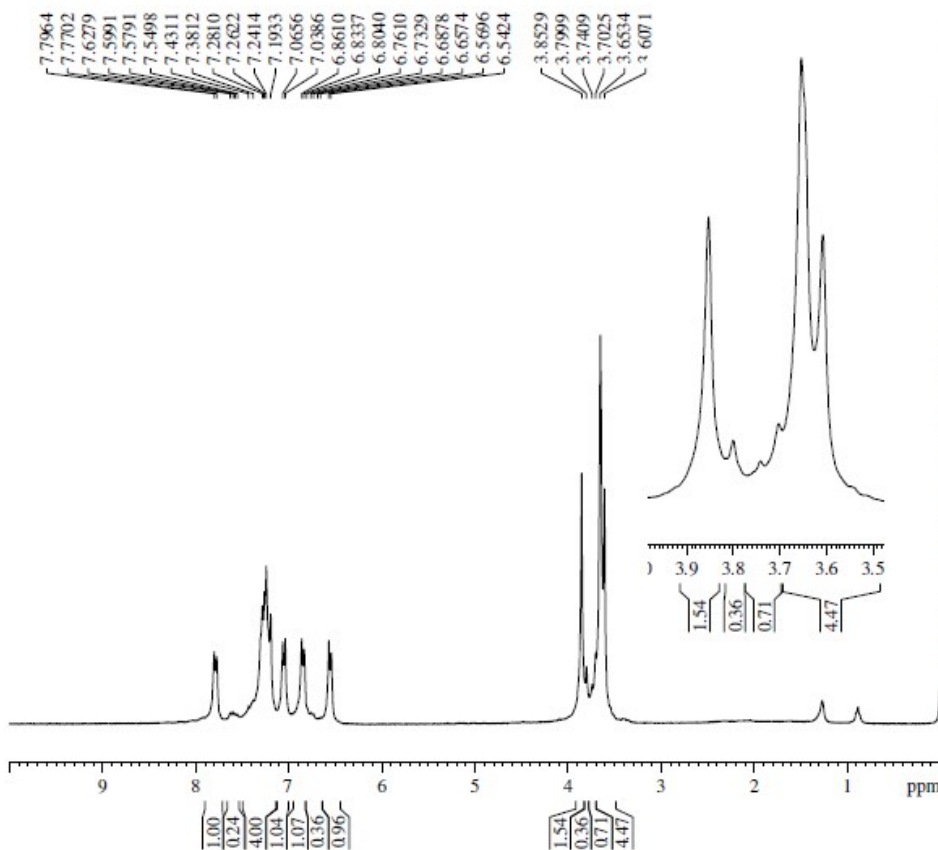

S17: <sup>1</sup>H NMR spectrum of 3f

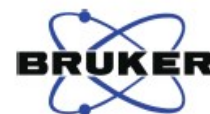

Current Data Parameters  
NAME 13-Mar-AN-2020  
EXPNO 330  
PROCNO 1

F2 - Acquisition Parameters  
Date\_ 20200313  
Time 16.29  
INSTRUM spect  
PROBHD 5 mm QNP 1H/13  
PULPROG zg30  
TD 65536  
SOLVENT CDCl3  
NS 16  
DS 2  
SWH 6188.119 Hz  
FIDRES 0.094423 Hz  
AQ 5.2953086 sec  
RG 228  
DW 80.800 usec  
DE 6.50 usec  
TE 300.0 K  
D1 1.00000000 sec  
TD0 1

==== CHANNEL f1 ====  
NUC1 1H  
P1 13.95 usec  
PL1 -1.00 dB  
PL1W 15.02081871 W  
SFO1 300.2598542 MHz

F2 - Processing parameters  
SI 32768  
SF 300.2580063 MHz  
WDW EM  
SSB 0  
LB 0.30 Hz  
GB 0  
PC 1.00

NRLD-410

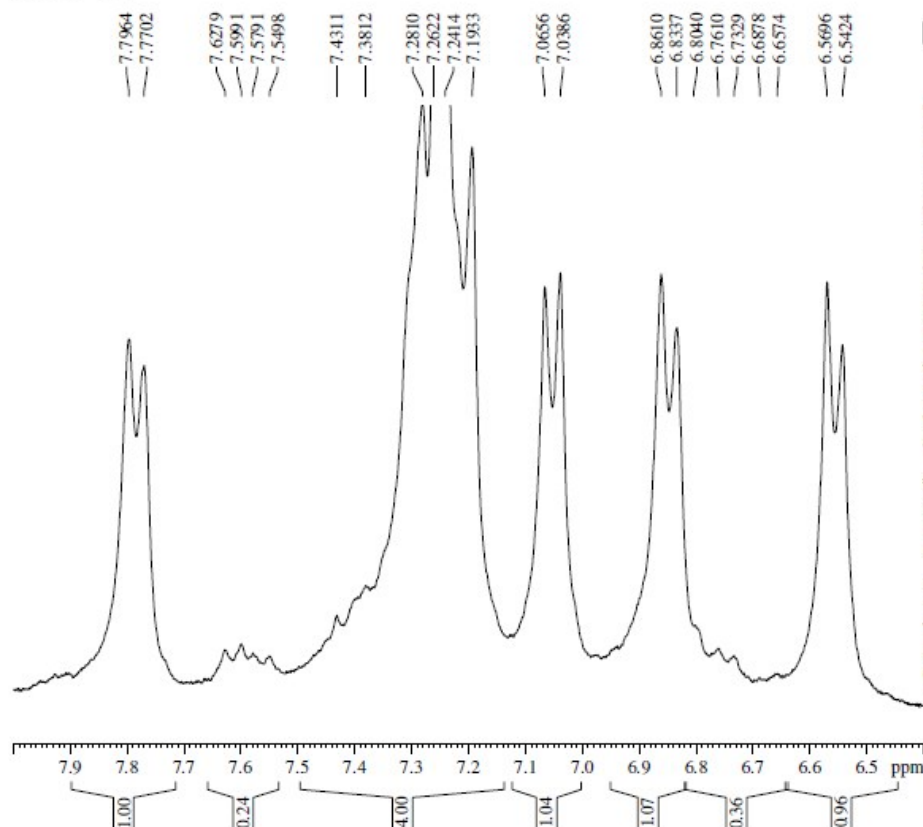

S18: <sup>1</sup>H NMR spectrum of 3f (expansion)

NRLD-410

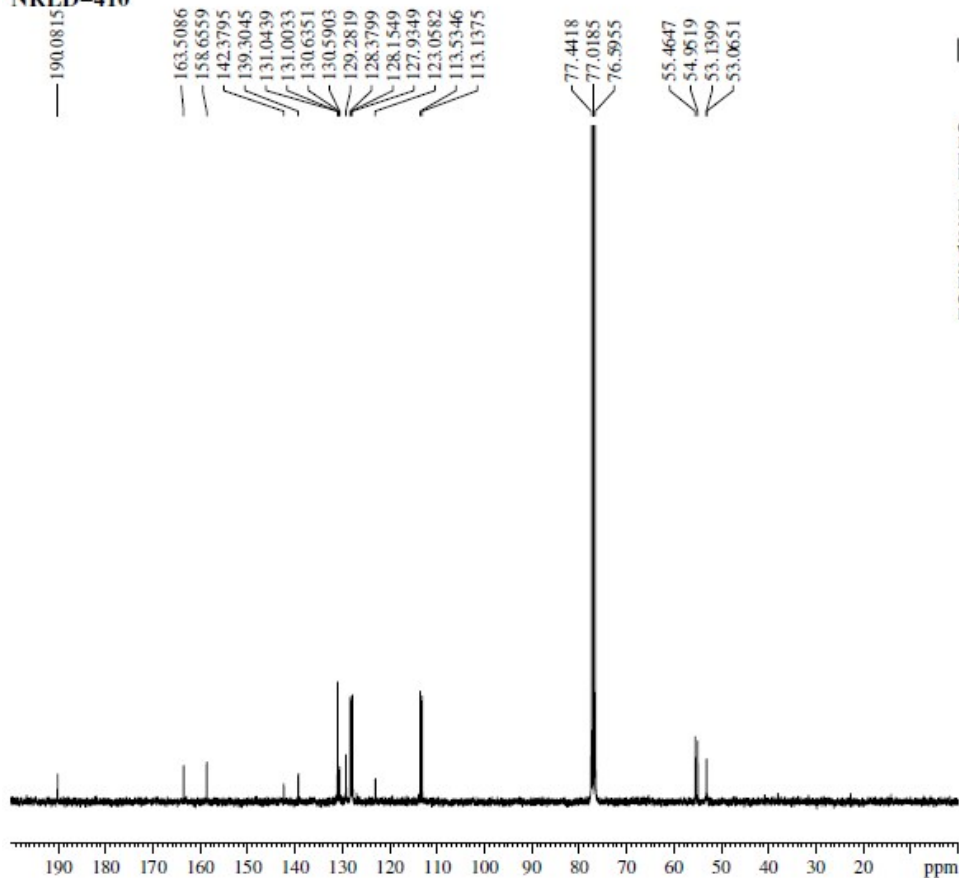

S19: <sup>13</sup>C NMR spectrum of 3f

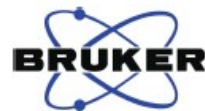

Current Data Parameters  
NAME 13-Mar-AN-2020  
EXPNO 330  
PROCNO 1

F2 - Acquisition Parameters  
Date\_ 20200313  
Time 16.29  
INSTRUM spect  
PROBHD 5 mm QNP 1H/13  
PULPROG zg30  
TD 65536  
SOLVENT CDCl3  
NS 16  
DS 2  
SWH 6188.119 Hz  
FIDRES 0.094423 Hz  
AQ 5.2953086 sec  
RG 228  
DW 80.800 usec  
DE 6.50 usec  
TE 300.0 K  
D1 1.00000000 sec  
TDO 1

==== CHANNEL f1 ====  
NUC1 1H  
PI 13.95 usec  
PL1 -1.00 dB  
PL1W 15.02081871 W  
SFO1 300.2598542 MHz

F2 - Processing parameters  
SI 32768  
SF 300.2580063 MHz  
WDW EM  
SSB 0  
LB 0.30 Hz  
GB 0  
PC 1.00

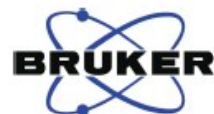

Current Data Parameters  
NAME 13-Mar-AN-2020  
EXPNO 340  
PROCNO 1

F2 - Processing parameters  
SI 32768  
SF 75.4999351 MHz  
WDW EM  
SSB 0  
LB 1.00 Hz  
GB 0  
PC 1.40

NRLD-410

13.4650  
11.5010

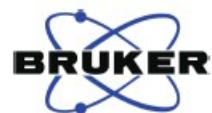

Current Data Parameters  
NAME 17-Mar-AN-2020  
EXPNO 350  
PROCNO 1

F2 - Processing parameters  
SI 32768  
SF 121.5466660 MHz  
WDW EM  
SSB 0  
LB 1.00 Hz  
GB 0  
PC 1.40

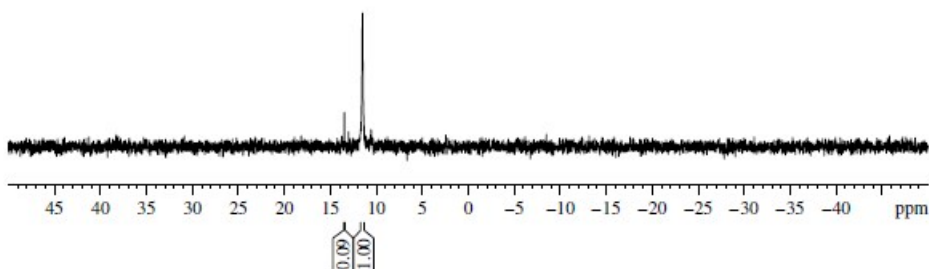

S20: <sup>31</sup>P NMR spectrum of 3f

NRLD 384

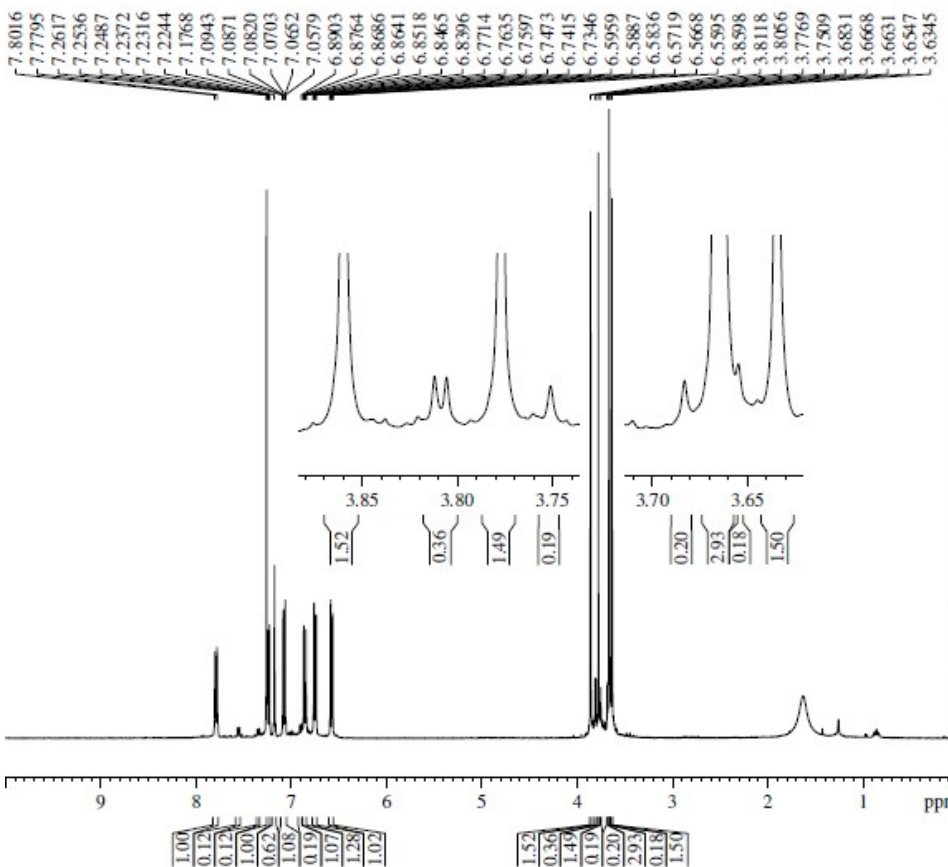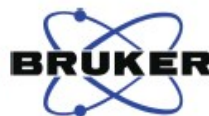

Current Data Parameters  
NAME 04-Nov-FN-2019  
EXPNO 490  
PROCNO 1

F2 - Acquisition Parameters  
Date\_ 20191104  
Time 16.35  
INSTRUM spect  
PROBHD 5 mm PABBO BB/  
PULPROG zg30  
TD 65536  
SOLVENT CDCl3  
NS 32  
DS 0  
SWH 9615.385 Hz  
FIDRES 0.146719 Hz  
AQ 3.4078720 sec  
RG 159.22  
DW 52.000 usec  
DE 6.50 usec  
TE 300.0 K  
D1 1.00000000 sec  
TD0 1

==== CHANNEL f1 ====  
SFO1 400.1629712 MHz  
NUC1 1H  
P1 13.20 usec  
PLW1 13.00000000 W

F2 - Processing parameters  
SI 65536  
SF 400.1605089 MHz  
WDW EM  
SSB 0  
LB 0.30 Hz  
GB 0  
PC 1.00

S21: <sup>1</sup>H NMR spectrum of 3g



NRLD 384

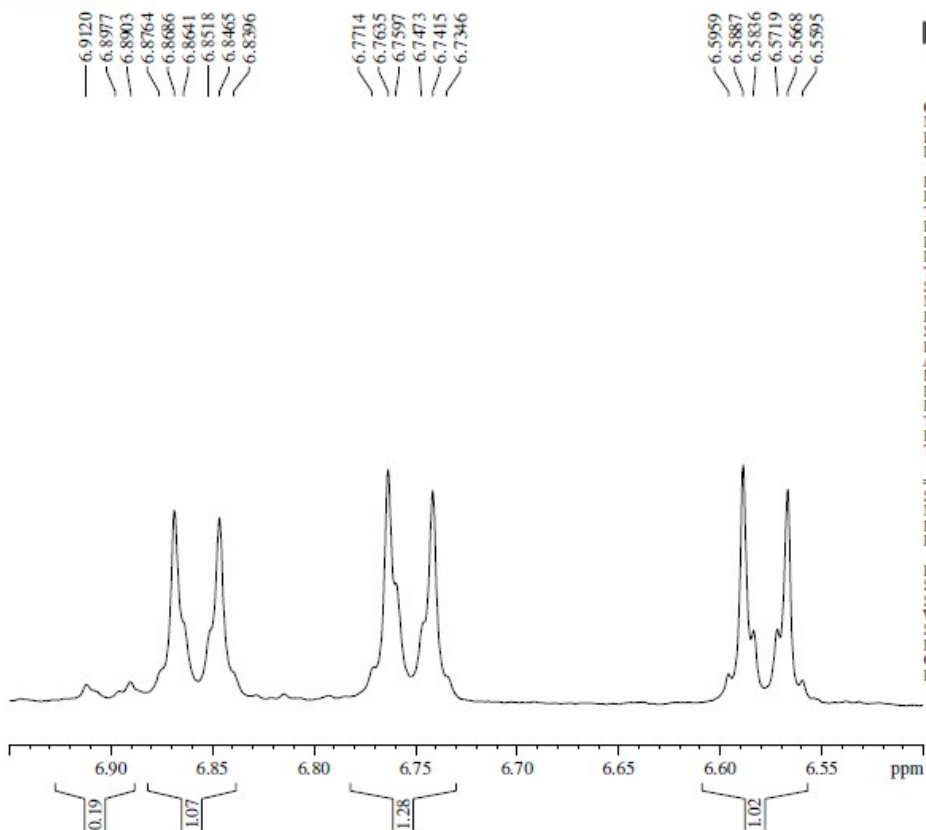

S22: <sup>1</sup>H NMR spectrum of 3g (expansion)

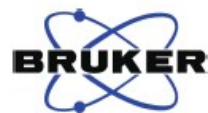

Current Data Parameters  
NAME 04-Nov-FN-2019  
EXPNO 490  
PROCNO 1

F2 - Acquisition Parameters  
Date\_ 20191104  
Time 16.35  
INSTRUM spect  
PROBHD 5 mm PABBO BB/  
PULPROG zg30  
TD 65536  
SOLVENT CDCl3  
NS 32  
DS 0  
SWH 9615.385 Hz  
FIDRES 0.146719 Hz  
AQ 3.4078720 sec  
RG 159.22  
DW 52.000 usec  
DE 6.50 usec  
TE 300.0 K  
D1 1.00000000 sec  
TD0 1

==== CHANNEL f1 ====  
SFO1 400.1629712 MHz  
NUC1 1H  
P1 13.20 usec  
PLW1 13.00000000 W

F2 - Processing parameters  
SI 65536  
SF 400.1605089 MHz  
WDW EM  
SSB 0  
LB 0.30 Hz  
GB 0  
PC 1.00

NRLD 384

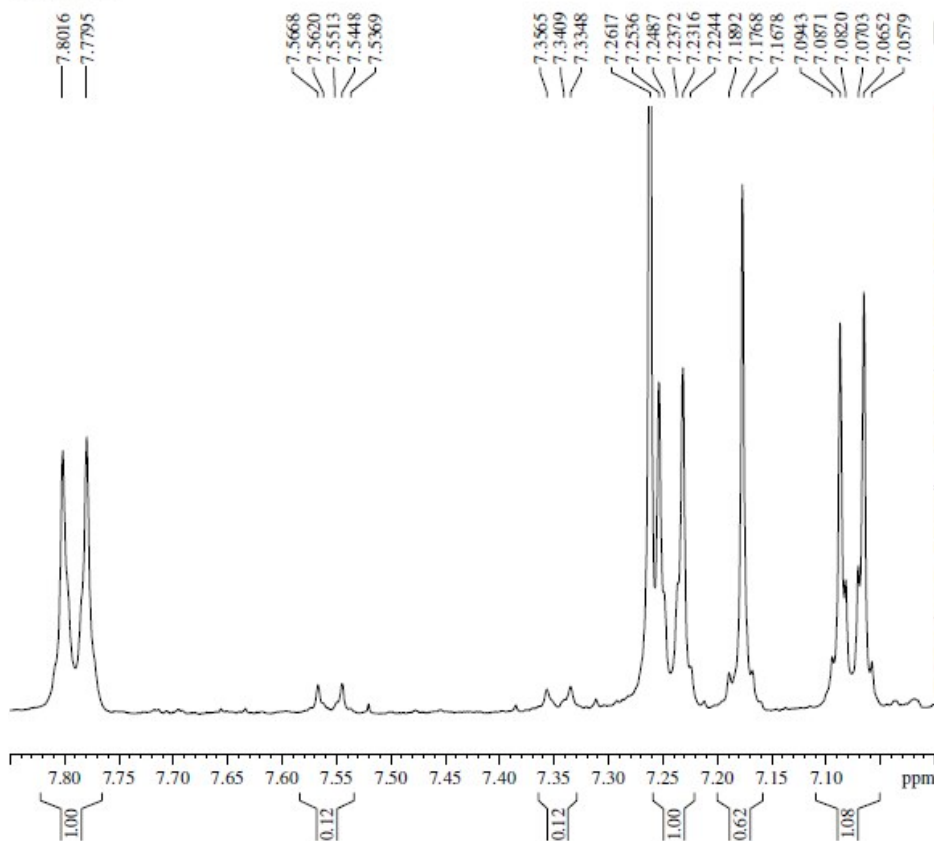

S23: <sup>1</sup>H NMR spectrum of 3g (expansion)

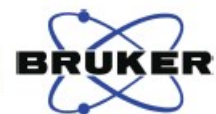

Current Data Parameters  
NAME 04-Nov-FN-2019  
EXPNO 490  
PROCNO 1

F2 - Acquisition Parameters  
Date\_ 20191104  
Time 16.35  
INSTRUM spect  
PROBHD 5 mm PABBO BB/  
PULPROG zg30  
TD 65536  
SOLVENT CDCl3  
NS 32  
DS 0  
SWH 9615.385 Hz  
FIDRES 0.146719 Hz  
AQ 3.4078720 sec  
RG 159.22  
DW 52.000 usec  
DE 6.50 usec  
TE 300.0 K  
D1 1.00000000 sec  
TD0 1

==== CHANNEL f1 ====  
SFO1 400.1629712 MHz  
NUC1 1H  
P1 13.20 usec  
PLW1 13.00000000 W

F2 - Processing parameters  
SI 65536  
SF 400.1605089 MHz  
WDW EM  
SSB 0  
LB 0.30 Hz  
GB 0  
PC 1.00

NRLD-384

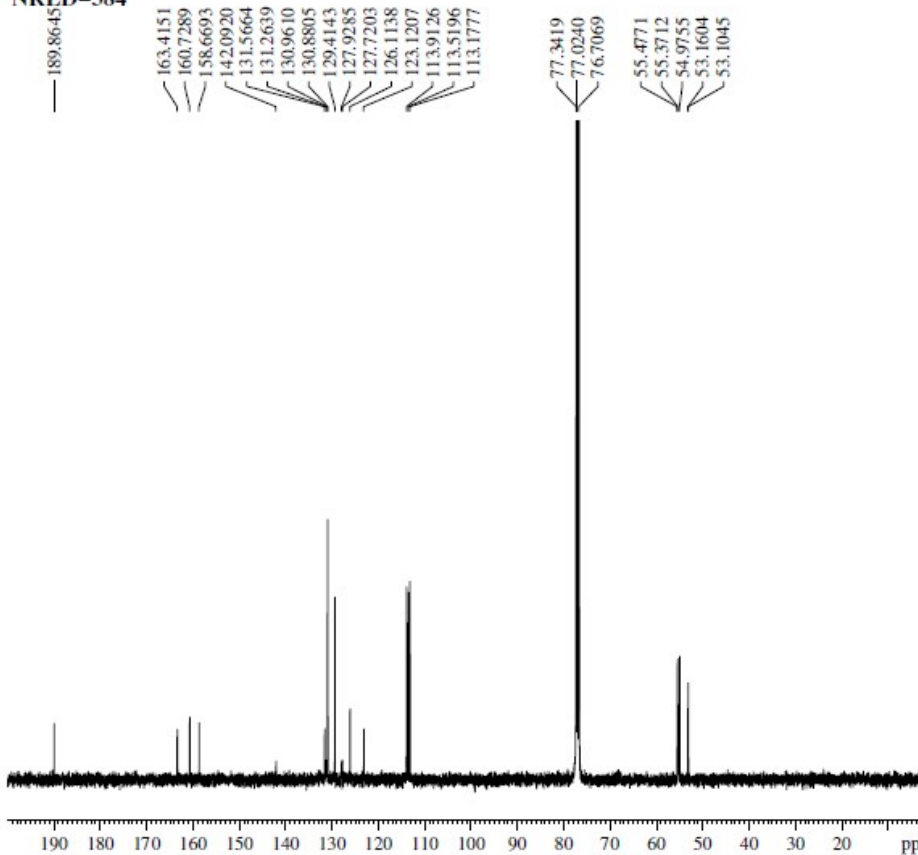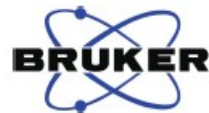

Current Data Parameters  
 NAME 04-Nov-AN-2019  
 EXPNO 350  
 PROCNO 1

F2 - Acquisition Parameters  
 Date\_ 20191105  
 Time 4.43  
 INSTRUM spect  
 PROBHD 5 mm PABBO BB/  
 PULPROG zgpg30  
 TD 65536  
 SOLVENT CDCl3  
 NS 4096  
 DS 4  
 SWH 24038.461 Hz  
 FIDRES 0.366798 Hz  
 AQ 1.3631488 sec  
 RG 201.48  
 DW 20.800 usec  
 DE 6.50 usec  
 TE 300.0 K  
 D1 2.0000000 sec  
 D11 0.0300000 sec  
 TD0 1

==== CHANNEL f1 ====  
 SFO1 100.6304993 MHz  
 NUC1 13C  
 P1 9.90 usec  
 PLW1 53.0000000 W

==== CHANNEL f2 ====  
 SFO2 400.1621006 MHz  
 NUC2 1H  
 CPDPRG2 waltz16  
 PCPD2 90.00 usec  
 PLW2 13.0000000 W  
 PLW12 0.27963999 W  
 PLW13 0.22651000 W

F2 - Processing parameters  
 SI 32768  
 SF 100.6204374 MHz  
 WDW EM  
 SSB 0  
 LB 1.00 Hz  
 GB 0  
 PC 1.40

S24: <sup>13</sup>C NMR spectrum of 3g

NRLD-384

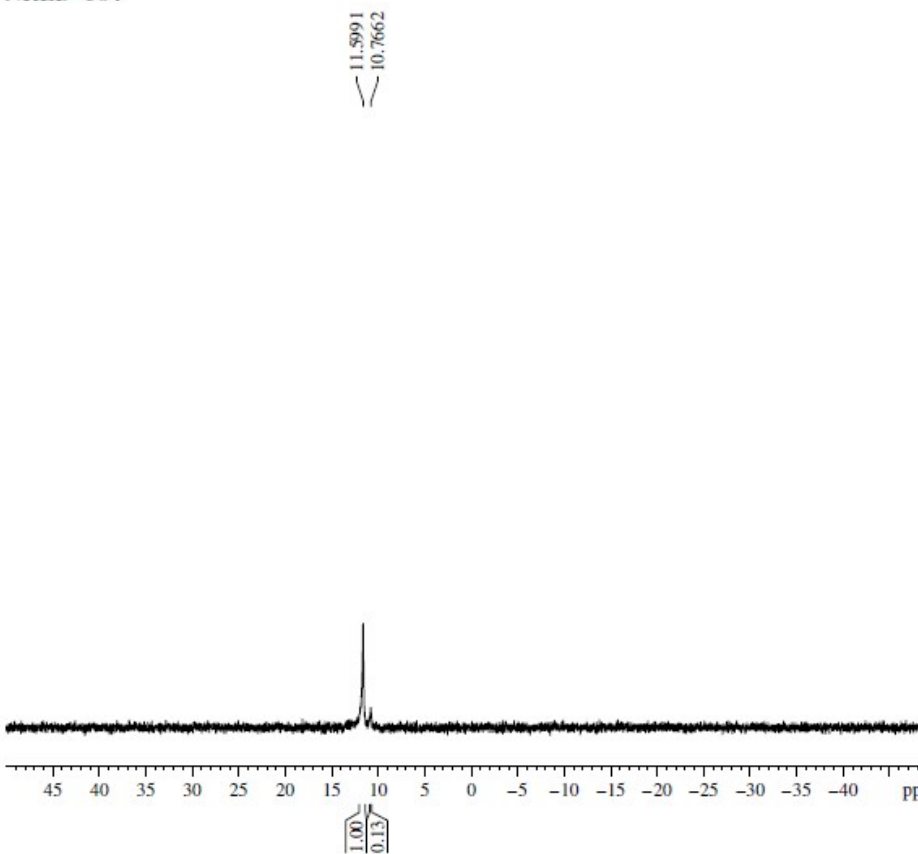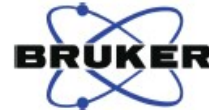

Current Data Parameters  
 NAME 13-May-FN-2019  
 EXPNO 490  
 PROCNO 1

F2 - Acquisition Parameters  
 Date\_ 20200513  
 Time 16.31  
 INSTRUM spect  
 PROBHD 5 mm PABBO BB/  
 PULPROG zgpg30  
 TD 65536  
 SOLVENT CDCl3  
 NS 16  
 DS 4  
 SWH 64102.563 Hz  
 FIDRES 0.978127 Hz  
 AQ 0.5111808 sec  
 RG 201.48  
 DW 7.800 usec  
 DE 6.50 usec  
 TE 300.1 K  
 D1 2.0000000 sec  
 D11 0.0300000 sec  
 TD0 1

==== CHANNEL f1 ====  
 SFO1 161.9798402 MHz  
 NUC1 31P  
 P1 15.00 usec  
 PLW1 12.0000000 W

==== CHANNEL f2 ====  
 SFO2 400.1621006 MHz  
 NUC2 1H  
 CPDPRG2 waltz16  
 PCPD2 90.00 usec  
 PLW2 13.0000000 W  
 PLW12 0.27963999 W  
 PLW13 0.22651000 W

F2 - Processing parameters  
 SI 32768  
 SF 161.9879400 MHz  
 WDW EM  
 SSB 0  
 LB 1.00 Hz  
 GB 0  
 PC 1.40

S25: <sup>31</sup>P NMR spectrum of 3g

NRLD-358

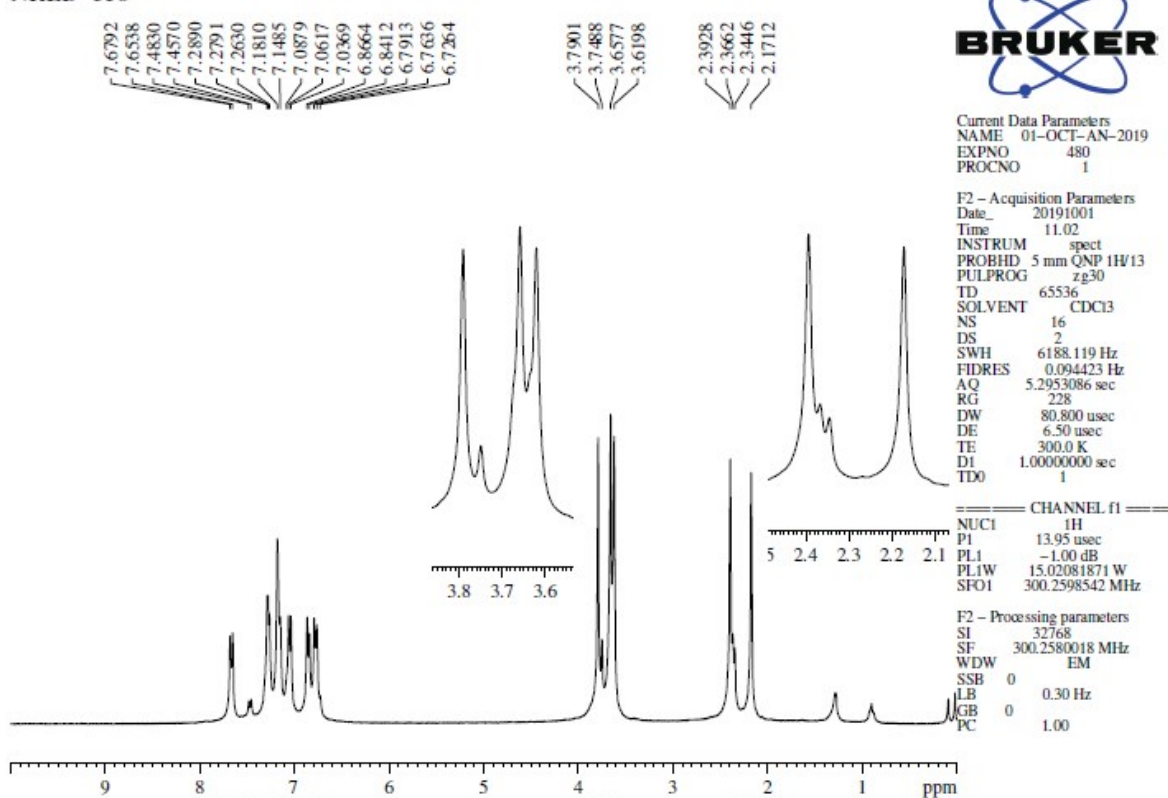

S26: <sup>1</sup>H NMR spectrum of 3h

NRLD-358

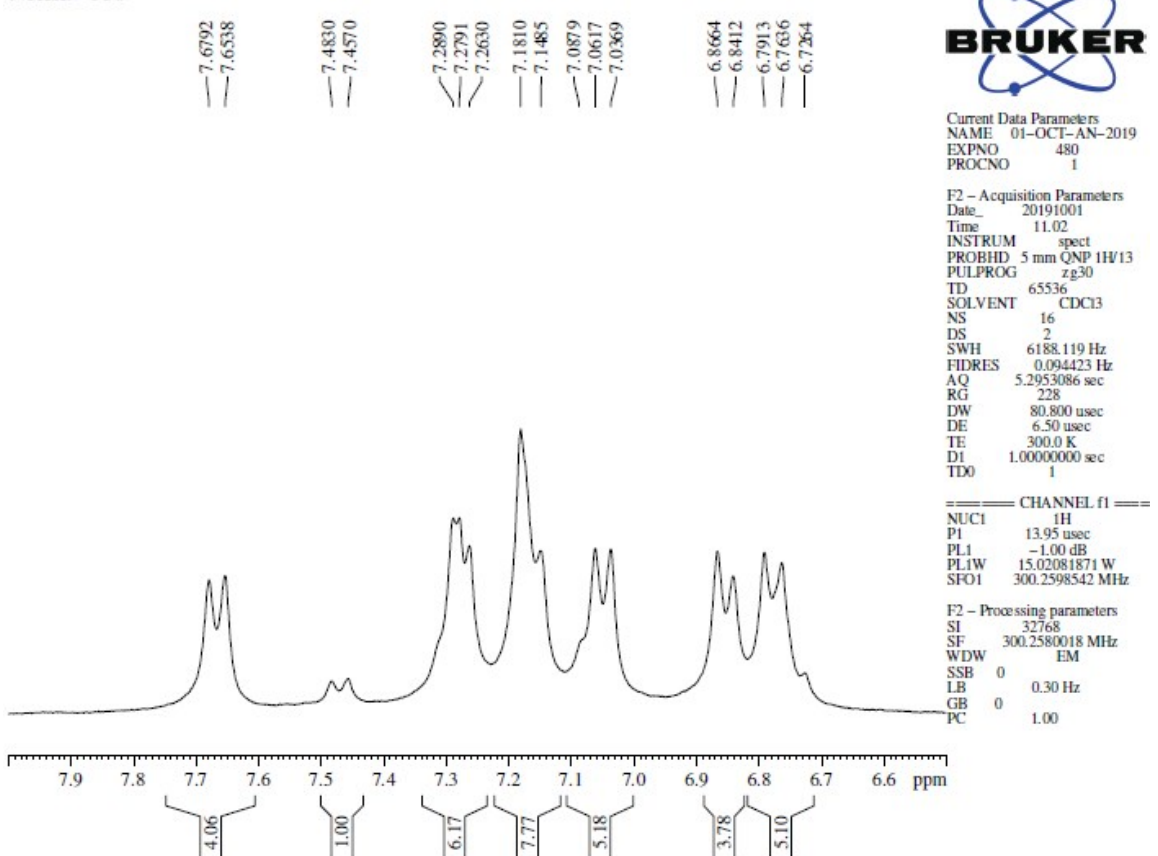

S27: <sup>1</sup>H NMR spectrum of 3h (expansion)

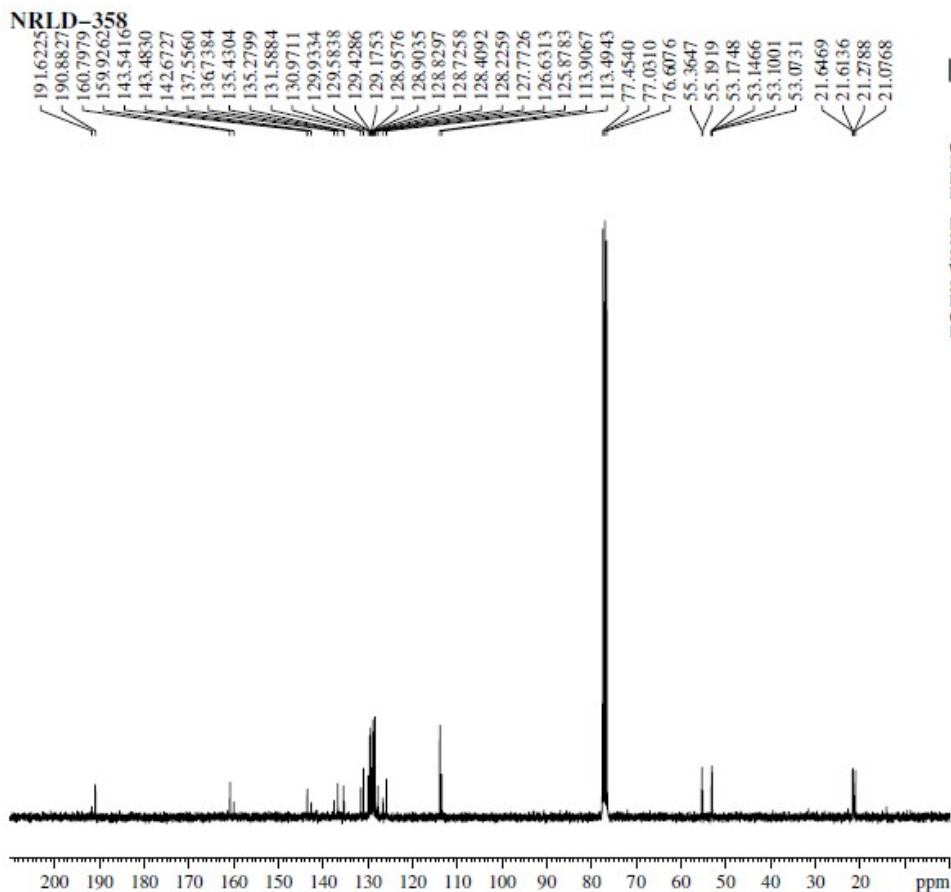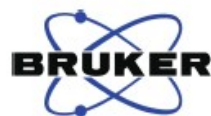

Current Data Parameters  
NAME 10-Oct-FN-2019  
EXPNO 500  
PROCNO 1

F2 - Processing parameters  
SI 32768  
SF 75.4999340 MHz  
WDW EM  
SSB 0  
LB 1.00 Hz  
GB 0  
PC 1.40

S28: <sup>13</sup>C NMR spectrum of 3h

NRLD-358

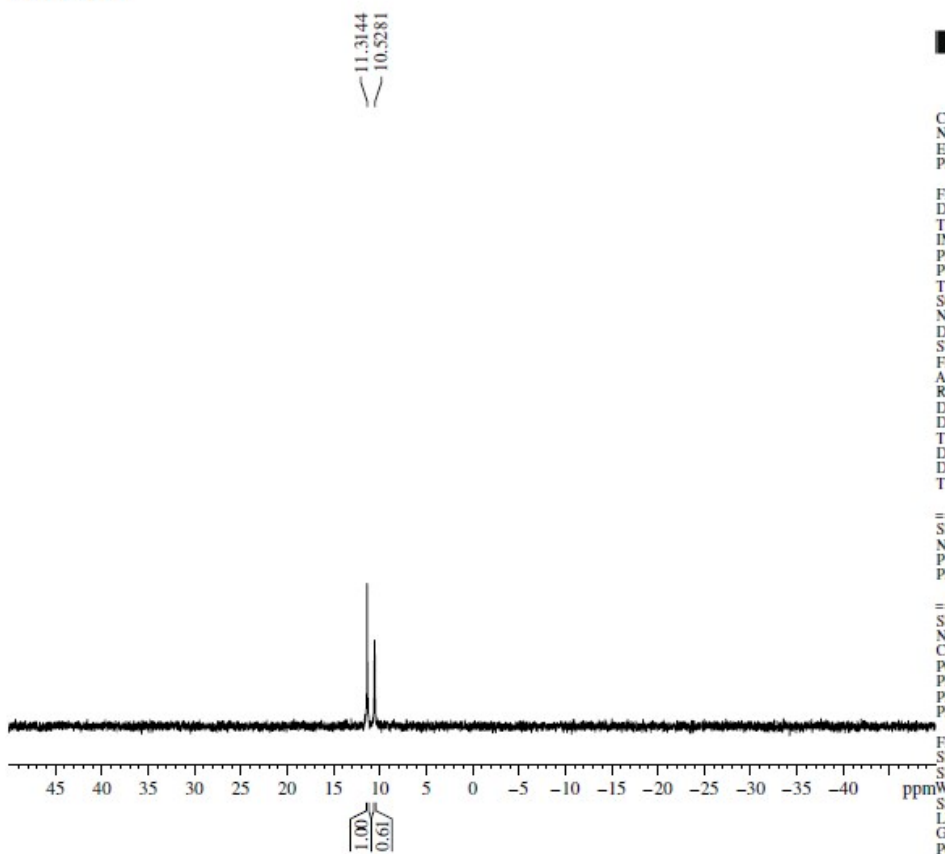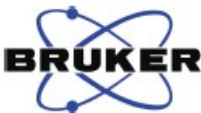

Current Data Parameters  
NAME 26-Dec-AN-2019  
EXPNO 540  
PROCNO 1

F2 - Acquisition Parameters  
Date\_ 20191226  
Time 21.20  
INSTRUM spect  
PROBHD 5 mm PABBO BB/  
PULPROG zgpg30  
TD 65536  
SOLVENT CDCl3  
NS 16  
DS 4  
SWH 64102.563 Hz  
FIDRES 0.978127 Hz  
AQ 0.511808 sec  
RG 201.48  
DW 7.800 usec  
DE 6.50 usec  
TE 303.1 K  
D1 2.0000000 sec  
D11 0.0300000 sec  
TD0 1

==== CHANNEL f1 ====  
SFO1 161.9798402 MHz  
NUC1 31P  
P1 15.00 usec  
PLW1 12.00000000 W

==== CHANNEL f2 ====  
SFO2 400.1621006 MHz  
NUC2 1H  
CPDPRG2 waltz16  
PCPD2 90.00 usec  
PLW2 13.00000000 W  
PLW12 0.27963999 W  
PLW13 0.22651000 W

F2 - Processing parameters  
SI 32768  
SF 161.9879400 MHz  
WDW EM  
SSB 0  
LB 1.00 Hz  
GB 0  
PC 1.40

S29: <sup>31</sup>P NMR spectrum of 3h



NRLD 392

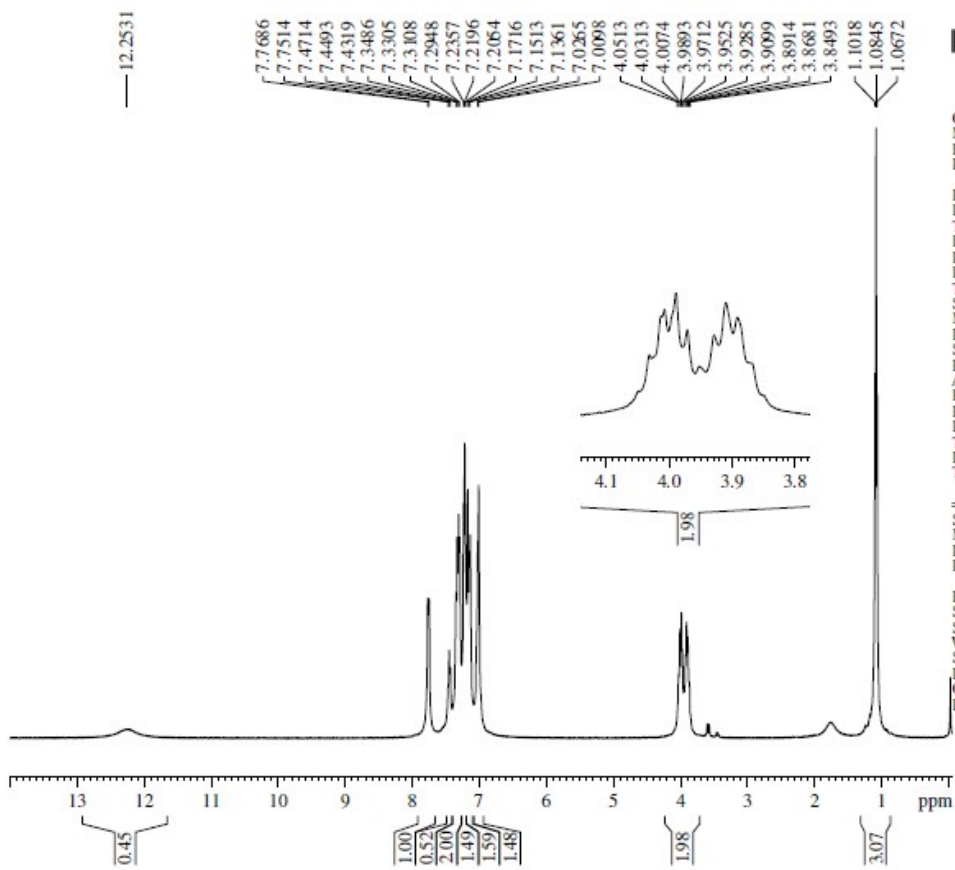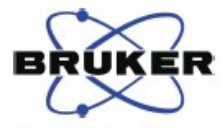

Current Data Parameters  
 NAME 13-Jan-FN-2020  
 EXPNO 500  
 PROCNO 1

F2 - Acquisition Parameters  
 Date\_ 20200113  
 Time 17.12  
 INSTRUM spect  
 PROBHD 5 mm PABBO BB/  
 PULPROG zg30  
 TD 65536  
 SOLVENT CDCl3  
 NS 8  
 DS 0  
 SWH 9615.385 Hz  
 FIDRES 0.146719 Hz  
 AQ 3.4078720 sec  
 RG 100.41  
 DW 52.000 usec  
 DE 6.50 usec  
 TE 303.0 K  
 DI 1.00000000 sec  
 TDO 1

==== CHANNEL f1 ====  
 SFO1 400.1629712 MHz  
 NUC1 1H  
 P1 13.20 usec  
 PLW1 13.00000000 W

F2 - Processing parameters  
 SI 65536  
 SF 400.1605188 MHz  
 WDW EM  
 SSB 0  
 LB 0.30 Hz  
 GB 0  
 PC 1.00

S30: <sup>1</sup>H NMR spectrum of 3i

NRLD 392

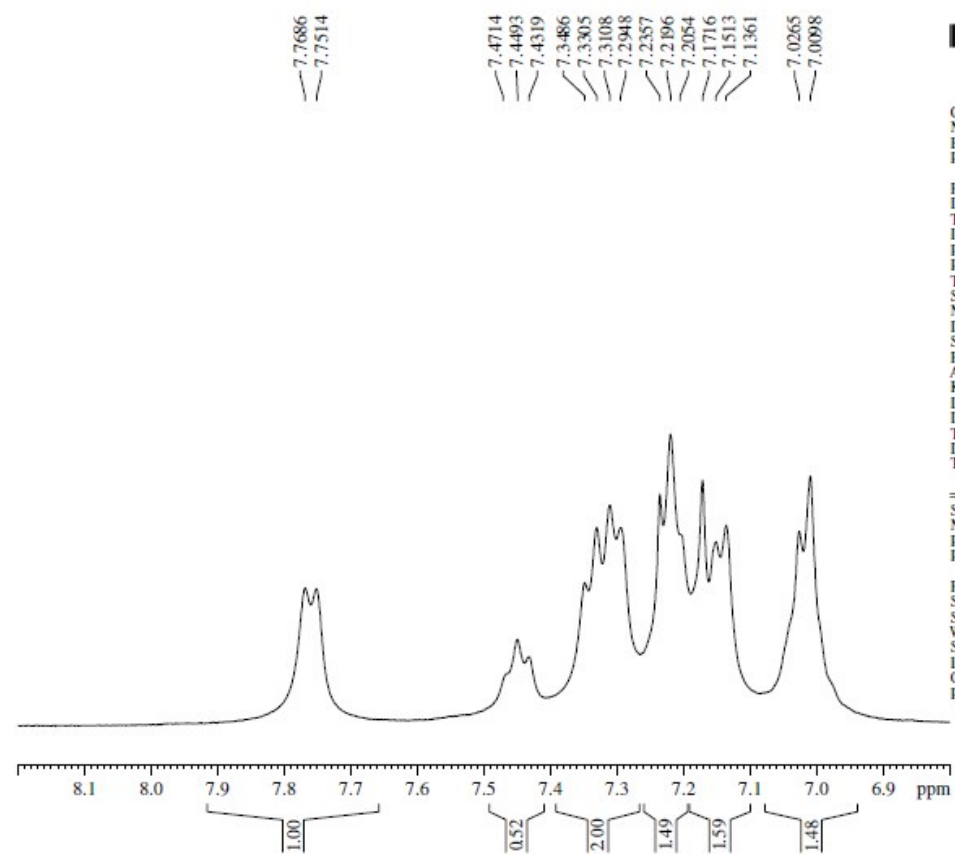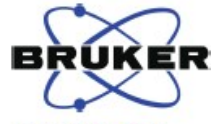

Current Data Parameters  
 NAME 13-Jan-FN-2020  
 EXPNO 500  
 PROCNO 1

F2 - Acquisition Parameters  
 Date\_ 20200113  
 Time 17.12  
 INSTRUM spect  
 PROBHD 5 mm PABBO BB/  
 PULPROG zg30  
 TD 65536  
 SOLVENT CDCl3  
 NS 8  
 DS 0  
 SWH 9615.385 Hz  
 FIDRES 0.146719 Hz  
 AQ 3.4078720 sec  
 RG 100.41  
 DW 52.000 usec  
 DE 6.50 usec  
 TE 303.0 K  
 DI 1.00000000 sec  
 TDO 1

==== CHANNEL f1 ====  
 SFO1 400.1629712 MHz  
 NUC1 1H  
 P1 13.20 usec  
 PLW1 13.00000000 W

F2 - Processing parameters  
 SI 65536  
 SF 400.1605188 MHz  
 WDW EM  
 SSB 0  
 LB 0.30 Hz  
 GB 0  
 PC 1.00

S31: <sup>1</sup>H NMR spectrum of 3i (expansion)

NRLD-392

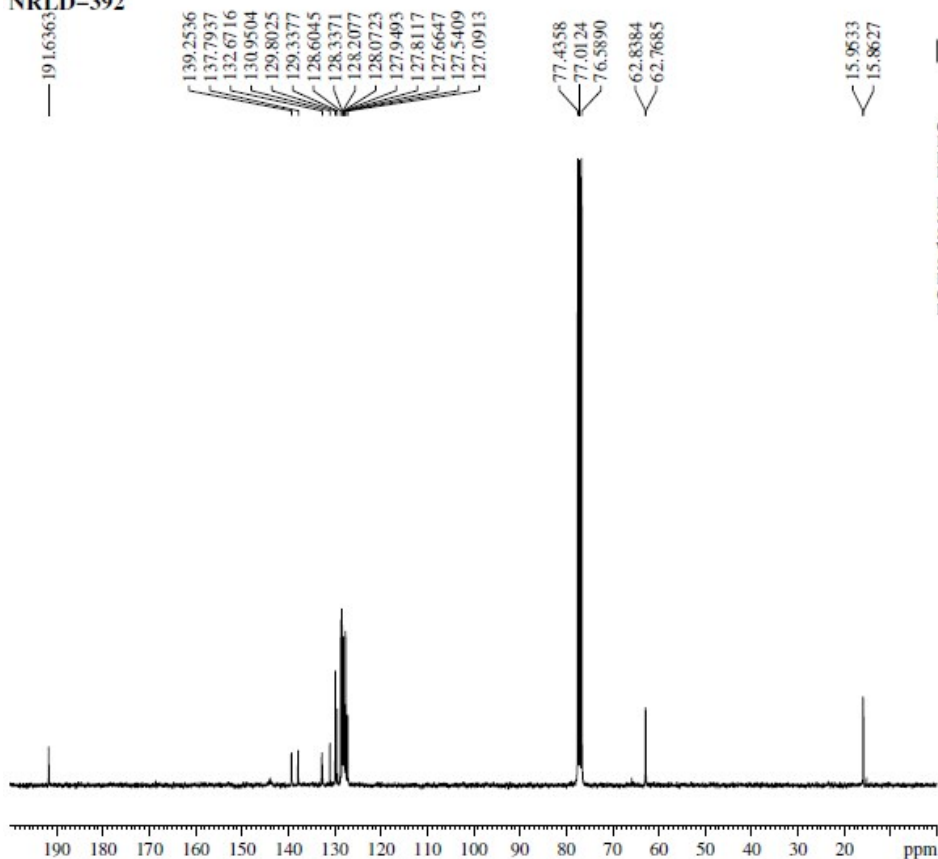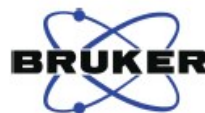

Current Data Parameters  
NAME 21-Jan-AN-2020  
EXPNO 410  
PROCNO 1

F2 - Processing parameters  
SI 32768  
SF 75.4999363 MHz  
WDW EM  
SSB 0  
LB 2.00 Hz  
GB 0  
PC 1.40

S32: <sup>13</sup>C NMR spectrum of 3i

NRLD 392

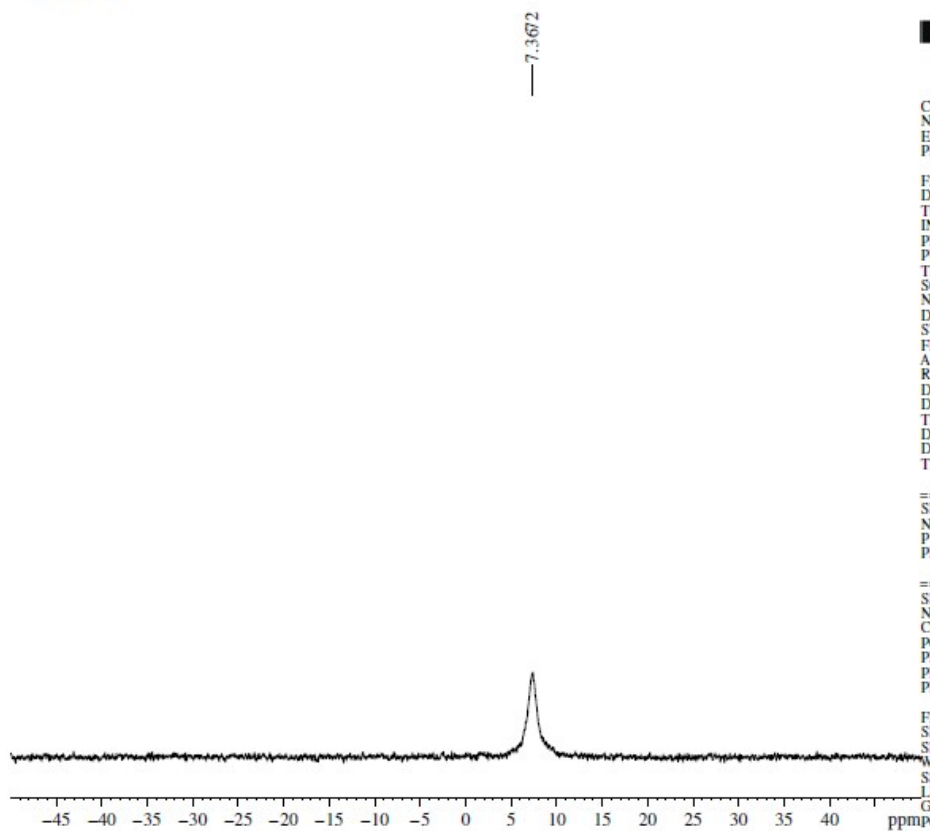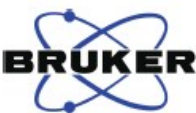

Current Data Parameters  
NAME 13-Jan-FN-2020  
EXPNO 560  
PROCNO 1

F2 - Acquisition Parameters  
Date\_ 20200113  
Time 17.14  
INSTRUM spect  
PROBHD 5 mm PABBO BB/  
PULPROG zgpg30  
TD 65536  
SOLVENT CDCl3  
NS 32  
DS 4  
SWH 64102.563 Hz  
FIDRES 0.978127 Hz  
AQ 0.5111808 sec  
RG 201.48  
DW 7.800 usec  
DE 6.50 usec  
TE 303.1 K  
D1 2.0000000 sec  
D11 0.0300000 sec  
TD0 1

==== CHANNEL f1 ====  
SFO1 161.9798402 MHz  
NUC1 31P  
P1 15.00 usec  
PLW1 12.00000000 W

==== CHANNEL f2 ====  
SFO2 400.1621006 MHz  
NUC2 1H  
CPDPRG2 waltz16  
PCPD2 90.00 usec  
PLW2 13.00000000 W  
PLW12 0.27963999 W  
PLW13 0.22651000 W

F2 - Processing parameters  
SI 32768  
SF 161.9879400 MHz  
WDW EM  
SSB 0  
LB 6.00 Hz  
GB 0  
PC 1.40

S33: <sup>31</sup>P NMR spectrum of 3i

NRLD-393

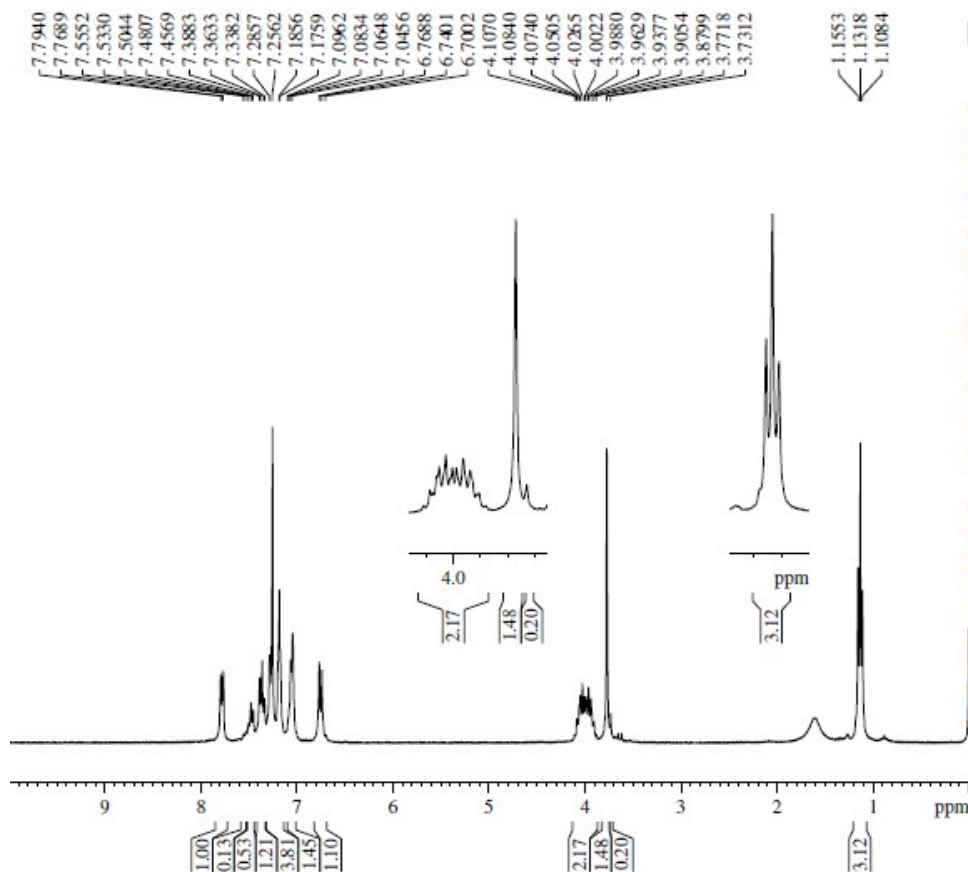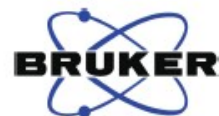

Current Data Parameters  
 NAME 24-Jan-FN-2020  
 EXPNO 520  
 PROCNO 1

F2 - Acquisition Parameters  
 Date\_ 20200124  
 Time 11.22  
 INSTRUM spect  
 PROBHD 5 mm QNP 1H/13  
 PULPROG zg30  
 TD 65536  
 SOLVENT CDCl3  
 NS 16  
 DS 2  
 SWH 6188.119 Hz  
 FIDRES 0.094423 Hz  
 AQ 5.2953086 sec  
 RG 322  
 DW 80.800 usec  
 DE 6.50 usec  
 TE 300.0 K  
 D1 1.00000000 sec  
 TDO 1

==== CHANNEL f1 ====  
 NUC1 1H  
 P1 13.95 usec  
 PL1 -1.00 dB  
 PL1W 15.02081871 W  
 SFO1 300.2598542 MHz

F2 - Processing parameters  
 SI 32768  
 SF 300.2580085 MHz  
 WDW EM  
 SSB 0  
 LB 0.30 Hz  
 GB 0  
 PC 1.00

S34: <sup>1</sup>H NMR spectrum of 3j

NRLD-393

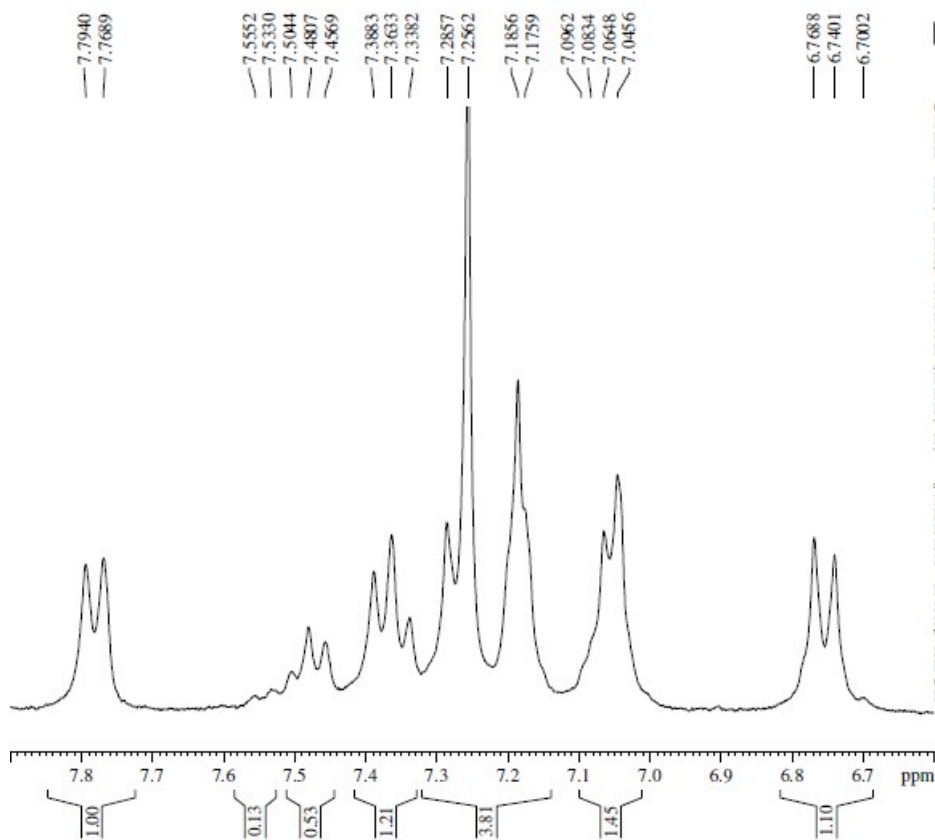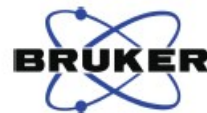

Current Data Parameters  
 NAME 24-Jan-FN-2020  
 EXPNO 520  
 PROCNO 1

F2 - Acquisition Parameters  
 Date\_ 20200124  
 Time 11.22  
 INSTRUM spect  
 PROBHD 5 mm QNP 1H/13  
 PULPROG zg30  
 TD 65536  
 SOLVENT CDCl3  
 NS 16  
 DS 2  
 SWH 6188.119 Hz  
 FIDRES 0.094423 Hz  
 AQ 5.2953086 sec  
 RG 322  
 DW 80.800 usec  
 DE 6.50 usec  
 TE 300.0 K  
 D1 1.00000000 sec  
 TDO 1

==== CHANNEL f1 ====  
 NUC1 1H  
 P1 13.95 usec  
 PL1 -1.00 dB  
 PL1W 15.02081871 W  
 SFO1 300.2598542 MHz

F2 - Processing parameters  
 SI 32768  
 SF 300.2580085 MHz  
 WDW EM  
 SSB 0  
 LB 0.30 Hz  
 GB 0  
 PC 1.00

S35: <sup>1</sup>H NMR spectrum of 3j (expansion)

NRLD-393

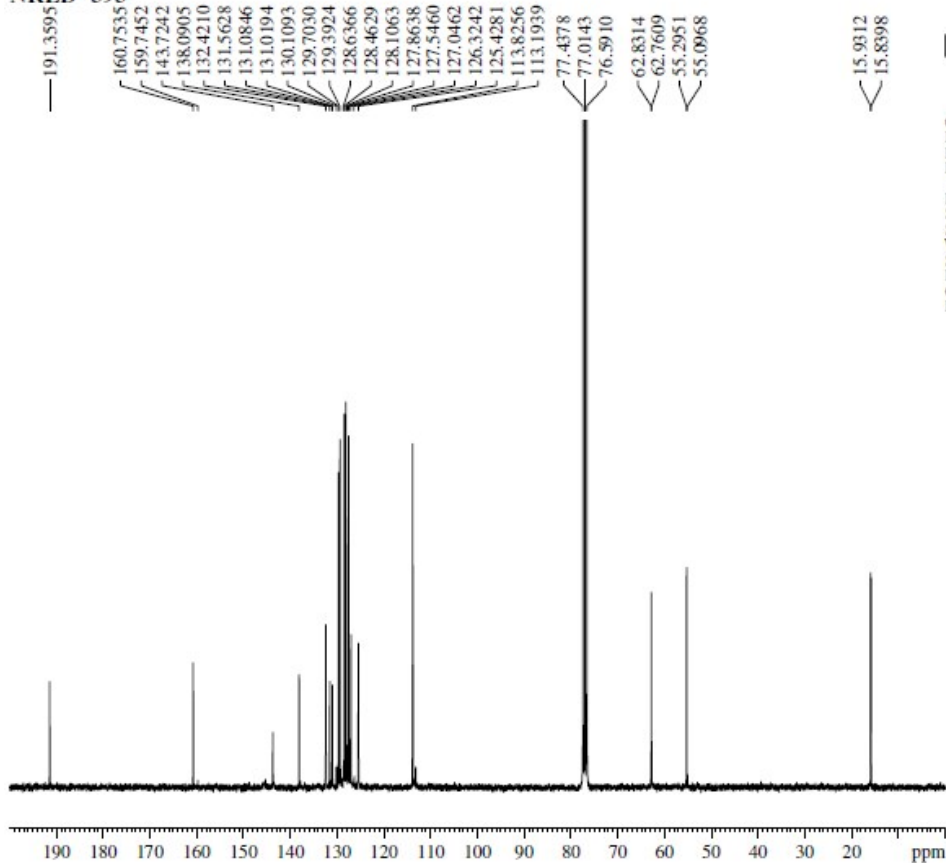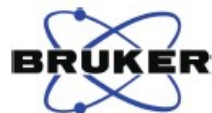

Current Data Parameters  
NAME 21-Jan-FN-2020  
EXPNO 430  
PROCNO 1

F2 - Processing parameters  
SI 32768  
SF 75.4999383 MHz  
WDW EM  
SSB 0  
LB 1.00 Hz  
GB 0  
PC 1.40

S36: <sup>13</sup>C NMR spectrum of 3j

NRLD-393

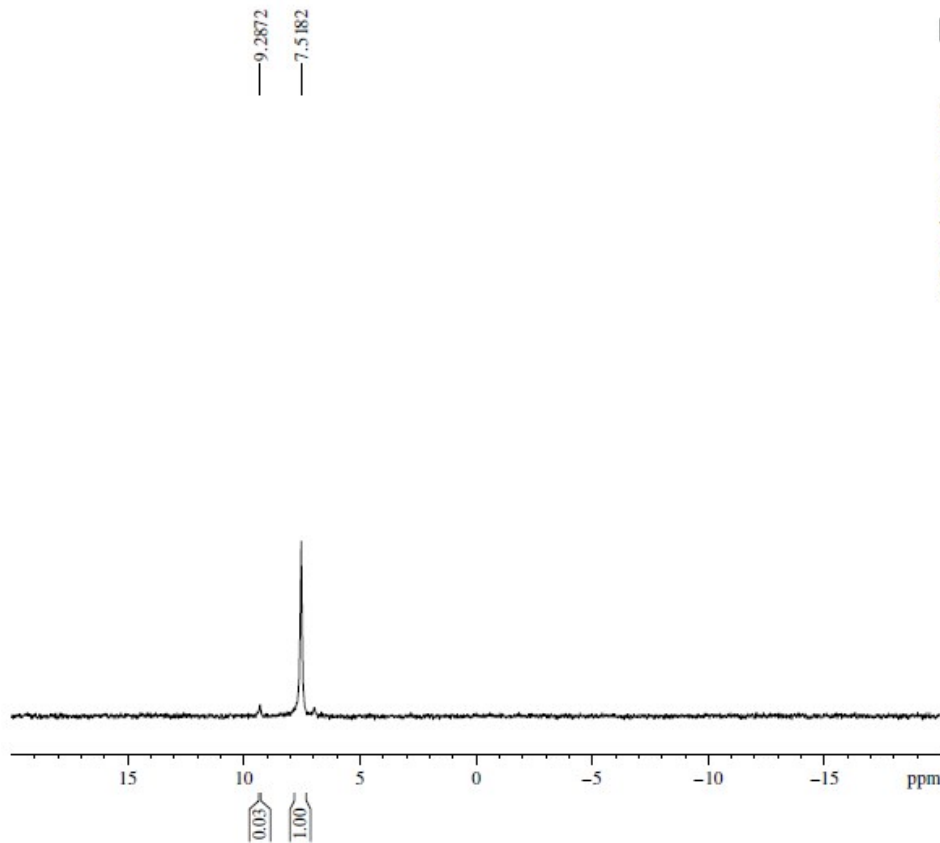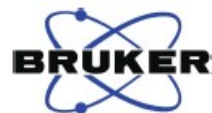

Current Data Parameters  
NAME 21-Jan-FN-2020  
EXPNO 420  
PROCNO 1

F2 - Processing parameters  
SI 32768  
SF 121.5466660 MHz  
WDW EM  
SSB 0  
LB 1.00 Hz  
GB 0  
PC 1.40

S37: <sup>31</sup>P NMR spectrum of 3j



NRLD-439

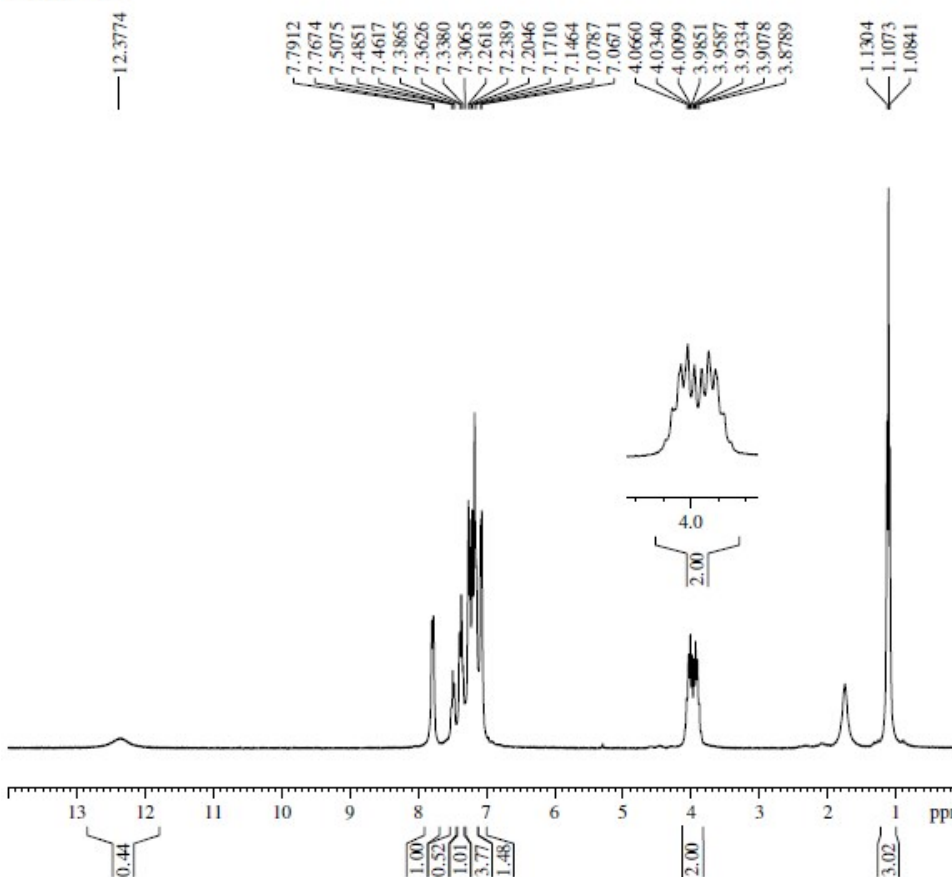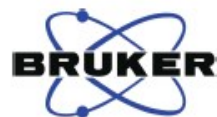

Current Data Parameters  
 NAME 29-JUNE-AN-2020  
 EXPNO 380  
 PROCNO 1

F2 - Acquisition Parameters  
 Date\_ 20200629  
 Time 16.22  
 INSTRUM spect  
 PROBHD 5 mm QNP 1H/13  
 PULPROG zg30  
 TD 65536  
 SOLVENT CDCl3  
 NS 16  
 DS 2  
 SWH 6188.119 Hz  
 FIDRES 0.094423 Hz  
 AQ 5.2953086 sec  
 RG 256  
 DW 80.800 usec  
 DE 6.50 usec  
 TE 300.0 K  
 D1 1.00000000 sec  
 TDO 1

==== CHANNEL f1 ====  
 NUC1 1H  
 P1 13.95 usec  
 PL1 -1.00 dB  
 PL1W 15.02081871 W  
 SFO1 300.2598542 MHz

F2 - Processing parameters  
 SI 32768  
 SF 300.2580069 MHz  
 WDW EM  
 SSB 0  
 LB 0.30 Hz  
 GB 0  
 PC 1.00

S38: <sup>1</sup>H NMR spectrum of 3k

NRLD-439

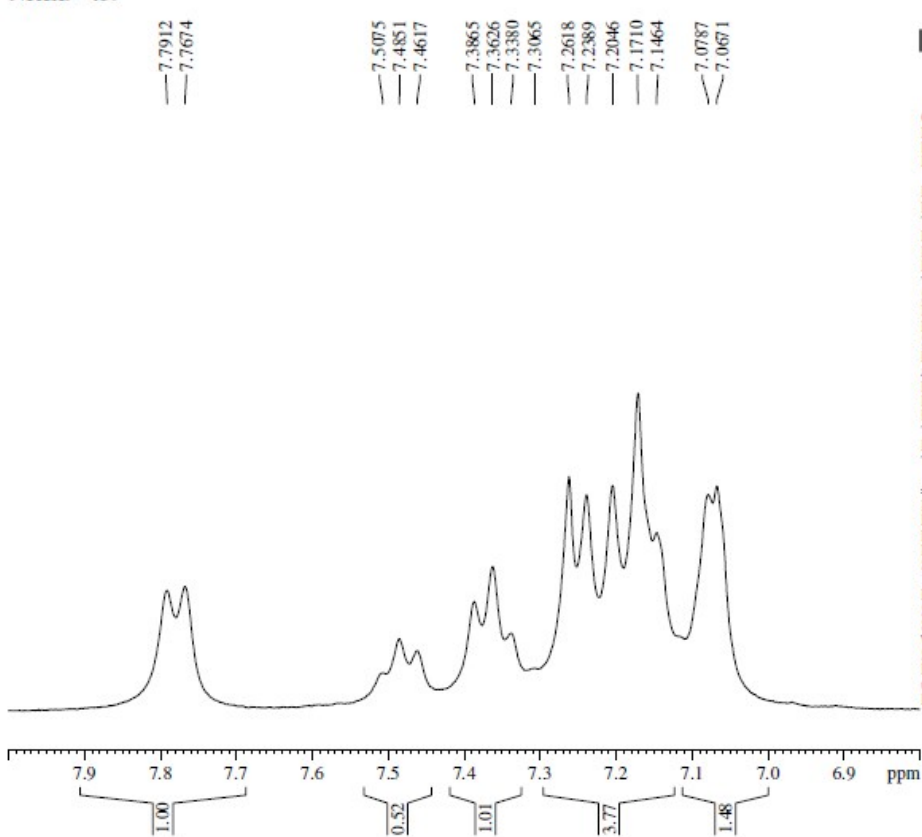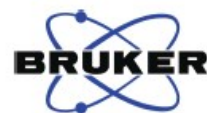

Current Data Parameters  
 NAME 29-JUNE-AN-2020  
 EXPNO 380  
 PROCNO 1

F2 - Acquisition Parameters  
 Date\_ 20200629  
 Time 16.22  
 INSTRUM spect  
 PROBHD 5 mm QNP 1H/13  
 PULPROG zg30  
 TD 65536  
 SOLVENT CDCl3  
 NS 16  
 DS 2  
 SWH 6188.119 Hz  
 FIDRES 0.094423 Hz  
 AQ 5.2953086 sec  
 RG 256  
 DW 80.800 usec  
 DE 6.50 usec  
 TE 300.0 K  
 D1 1.00000000 sec  
 TDO 1

==== CHANNEL f1 ====  
 NUC1 1H  
 P1 13.95 usec  
 PL1 -1.00 dB  
 PL1W 15.02081871 W  
 SFO1 300.2598542 MHz

F2 - Processing parameters  
 SI 32768  
 SF 300.2580069 MHz  
 WDW EM  
 SSB 0  
 LB 0.30 Hz  
 GB 0  
 PC 1.00

S39: <sup>1</sup>H NMR spectrum of 3k (expansion)

NRLD-439

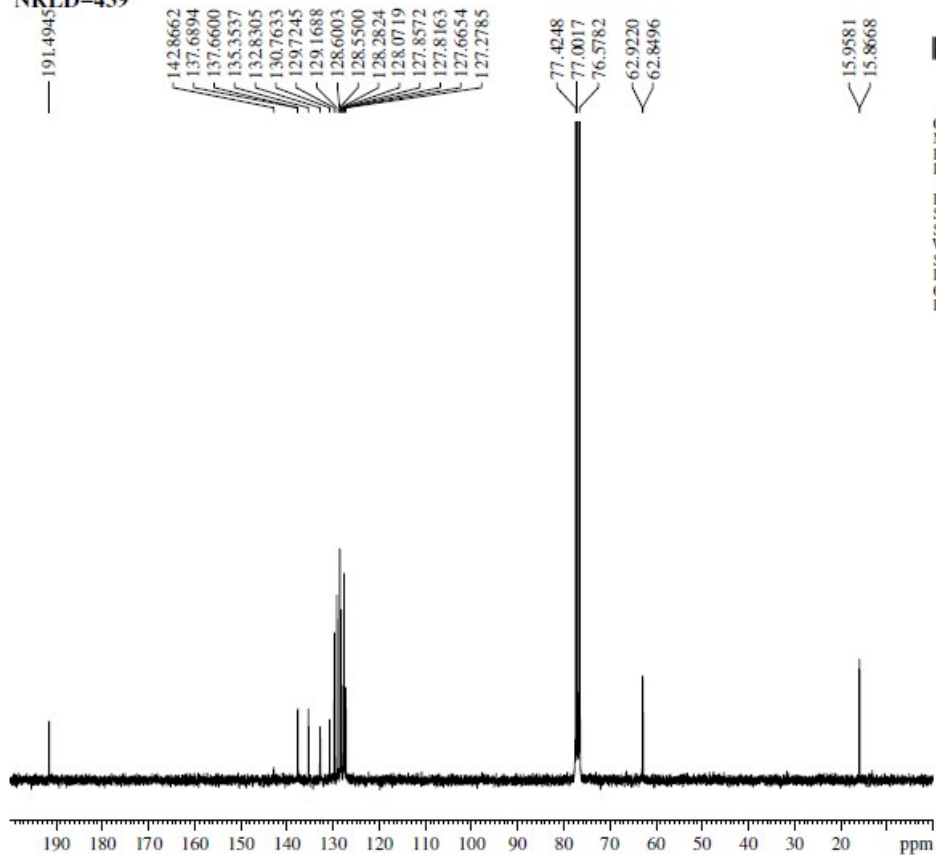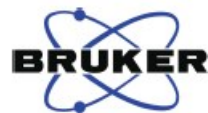

Current Data Parameters  
 NAME 30-June-AN-2020  
 EXPNO 310  
 PROCNO 1

F2 - Processing parameters  
 SI 32768  
 SF 75.4999361 MHz  
 WDW EM  
 SSB 0  
 LB 1.00 Hz  
 GB 0  
 PC 1.40

S40: 13C NMR spectrum of 3k

NRLD 439

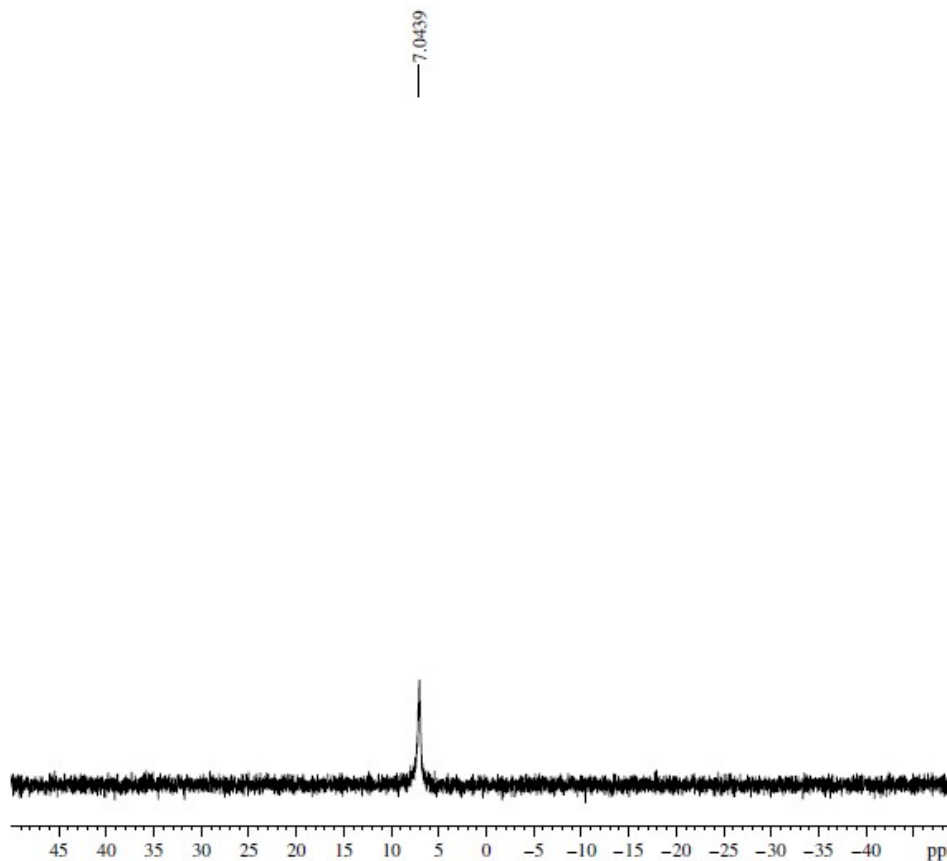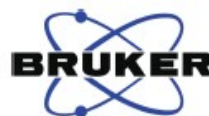

Current Data Parameters  
 NAME 24-July-FN-2020  
 EXPNO 560  
 PROCNO 1

F2 - Acquisition Parameters  
 Date\_ 20200724  
 Time 17.47  
 INSTRUM spect  
 PROBHD 5 mm PABBO BB/  
 PULPROG zgpg30  
 TD 65536  
 SOLVENT CDCl3  
 NS 32  
 DS 4  
 SWH 64102.563 Hz  
 FIDRES 0.978127 Hz  
 AQ 0.5111808 sec  
 RG 201.48  
 DW 7.800 usec  
 DE 6.50 usec  
 TE 300.1 K  
 D1 2.0000000 sec  
 D11 0.03000000 sec  
 TD0 1

==== CHANNEL f1 ====  
 SFO1 161.9798402 MHz  
 NUC1 31P  
 P1 15.00 usec  
 PLW1 12.00000000 W

==== CHANNEL f2 ====  
 SFO2 400.1621006 MHz  
 NUC2 1H  
 CPDPRG2 waltz16  
 PCPD2 90.00 usec  
 PLW2 13.00000000 W  
 PLW12 0.27963999 W  
 PLW13 0.22651000 W

F2 - Processing parameters  
 SI 32768  
 SF 161.9879400 MHz  
 WDW EM  
 SSB 0  
 LB 1.00 Hz  
 GB 0  
 PC 1.40

S41: 31P NMR spectrum of 3k

NRLD-363

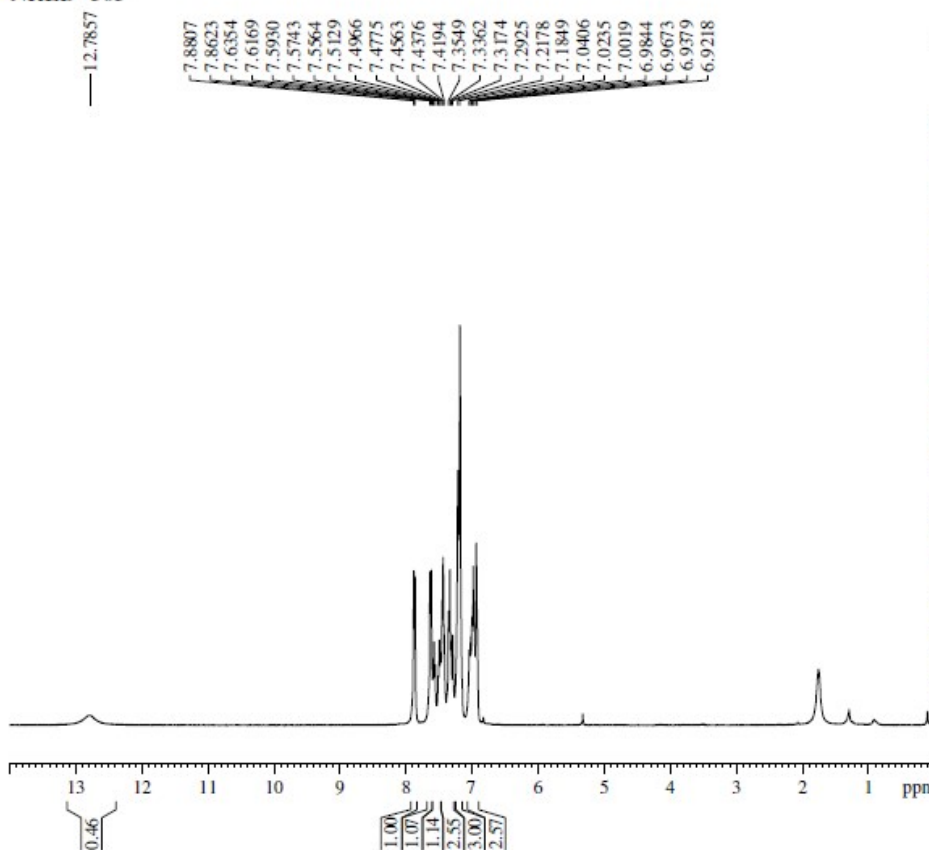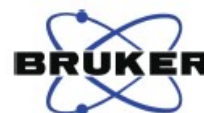

Current Data Parameters  
 NAME 04-Nov-AN-2019  
 EXPNO 360  
 PROCNO 1

F2 - Acquisition Parameters  
 Date\_ 700101  
 Time 5.30  
 INSTRUM  
 PROBHD  
 PULPROG zg30  
 TD 65536  
 SOLVENT  
 NS 16  
 DS 2  
 SWH 8012.820 Hz  
 FIDRES 0.122266 Hz  
 AQ 4.0894465 sec  
 RG 32  
 DW 62.400 usec  
 DE 6.50 usec  
 TE 298.0 K  
 D1 1.00000000 sec  
 TD0 1

==== CHANNEL f1 ====  
 SFO1 400.1629712 MHz  
 NUC1 1H  
 P1 10.00 usec  
 PLW1 0 W

F2 - Processing parameters  
 SI 65536  
 SF 400.1604974 MHz  
 WDW EM  
 SSB 0  
 LB 0.30 Hz  
 GB 0  
 PC 1.00

S42: <sup>1</sup>H NMR spectrum of 31

NRLD-363

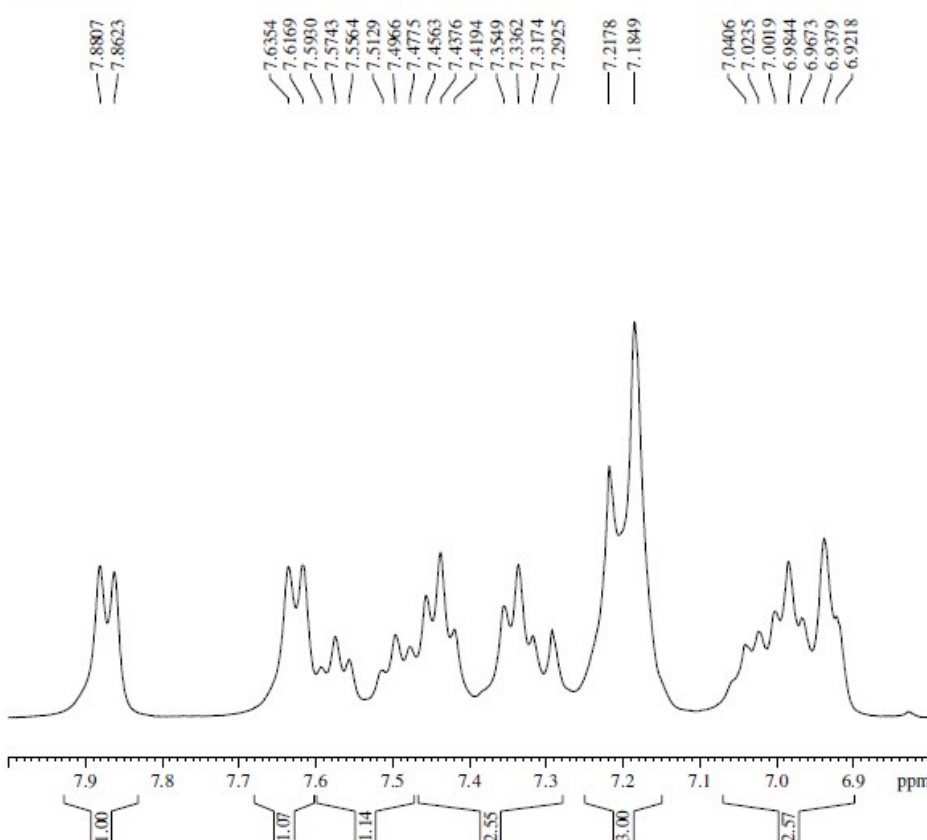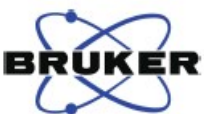

Current Data Parameters  
 NAME 04-Nov-AN-2019  
 EXPNO 360  
 PROCNO 1

F2 - Acquisition Parameters  
 Date\_ 700101  
 Time 5.30  
 INSTRUM  
 PROBHD  
 PULPROG zg30  
 TD 65536  
 SOLVENT  
 NS 16  
 DS 2  
 SWH 8012.820 Hz  
 FIDRES 0.122266 Hz  
 AQ 4.0894465 sec  
 RG 32  
 DW 62.400 usec  
 DE 6.50 usec  
 TE 298.0 K  
 D1 1.00000000 sec  
 TD0 1

==== CHANNEL f1 ====  
 SFO1 400.1629712 MHz  
 NUC1 1H  
 P1 10.00 usec  
 PLW1 0 W

F2 - Processing parameters  
 SI 65536  
 SF 400.1604974 MHz  
 WDW EM  
 SSB 0  
 LB 0.30 Hz  
 GB 0  
 PC 1.00

S43: <sup>1</sup>H NMR spectrum of 31 (expansion)

NRLD 363

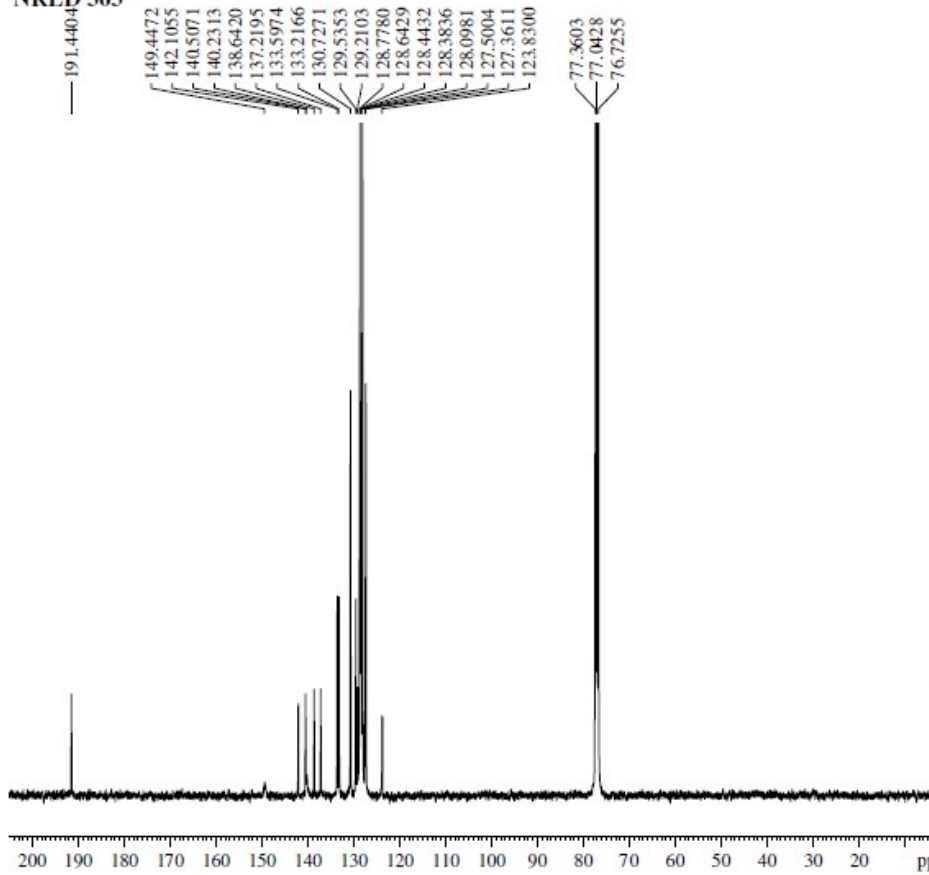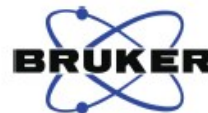

Current Data Parameters  
 NAME 30-Oct-FN-2019  
 EXPNO 410  
 PROCNO 1

F2 - Acquisition Parameters  
 Date\_ 20191031  
 Time 7.21  
 INSTRUM spect  
 PROBHD 5 mm PABBO BB/  
 PULPROG zgpg30  
 TD 65536  
 SOLVENT CDC13  
 NS 4096  
 DS 0  
 SWH 32051.281 Hz  
 FIDRES 0.489064 Hz  
 AQ 1.0223616 sec  
 RG 201.48  
 DW 15.600 usec  
 DE 6.50 usec  
 TE 300.0 K  
 D1 2.0000000 sec  
 D11 0.03000000 sec  
 TDO 1

==== CHANNEL f1 ====  
 SFO1 100.6304993 MHz  
 NUC1 13C  
 P1 9.90 usec  
 PLW1 53.0000000 W

==== CHANNEL f2 ====  
 SFO2 400.1621006 MHz  
 NUC2 1H  
 CPDPRG2 waltz16  
 PCPD2 90.00 usec  
 PLW2 13.0000000 W  
 PLW12 0.27963999 W  
 PLW13 0.22651000 W

F2 - Processing parameters  
 SI 32768  
 SF 100.6204380 MHz  
 WDW EM  
 SSB 0  
 LB 3.00 Hz  
 GB 0  
 PC 1.40

S44: <sup>13</sup>C NMR spectrum of 3l

NRLD-413

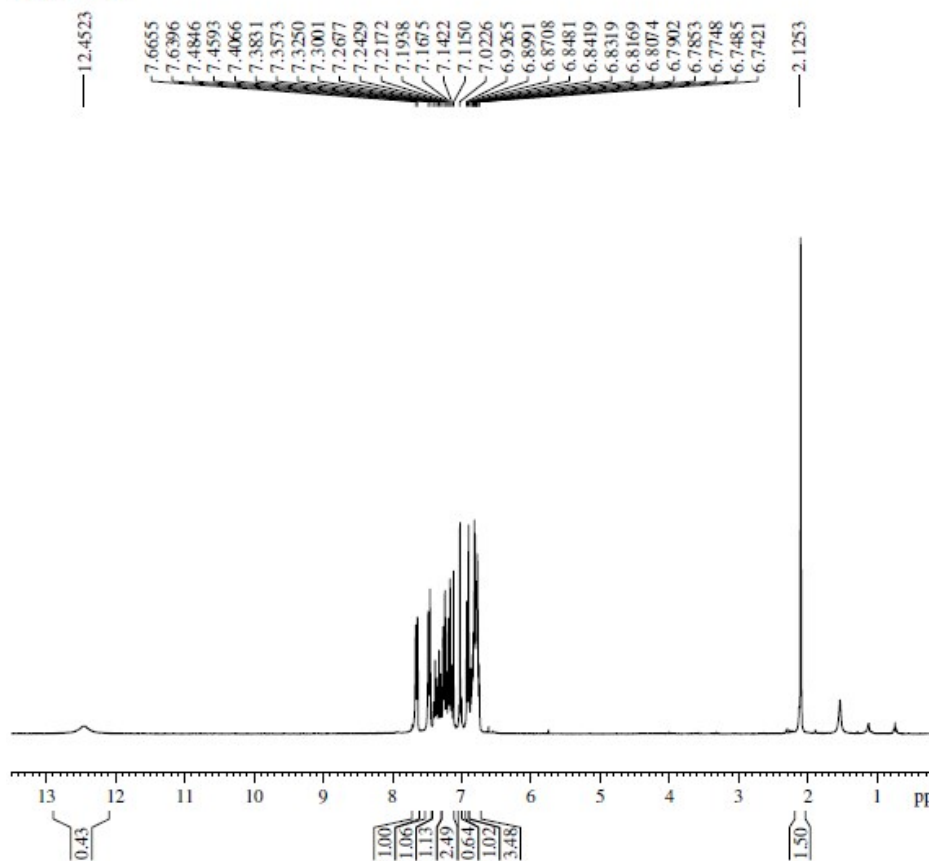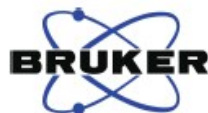

Current Data Parameters  
 NAME 06-Feb-AN-2020  
 EXPNO 330  
 PROCNO 1

F2 - Acquisition Parameters  
 Date\_ 20200206  
 Time 16.03  
 INSTRUM spect  
 PROBHD 5 mm QNP 1H/13  
 PULPROG zg30  
 TD 65536  
 SOLVENT CDC13  
 NS 16  
 DS 2  
 SWH 6188.119 Hz  
 FIDRES 0.094423 Hz  
 AQ 5.2953086 sec  
 RG 203  
 DW 80.800 usec  
 DE 6.50 usec  
 TE 300.0 K  
 D1 1.0000000 sec  
 TDO 1

==== CHANNEL f1 ====  
 NUC1 1H  
 P1 13.95 usec  
 PL1 -1.00 dB  
 PL1W 15.02081871 W  
 SFO1 300.2598542 MHz

F2 - Processing parameters  
 SI 32768  
 SF 300.2580509 MHz  
 WDW EM  
 SSB 0  
 LB 0.30 Hz  
 GB 0  
 PC 1.00

S45: <sup>1</sup>H NMR spectrum of 3m

NRLD-413

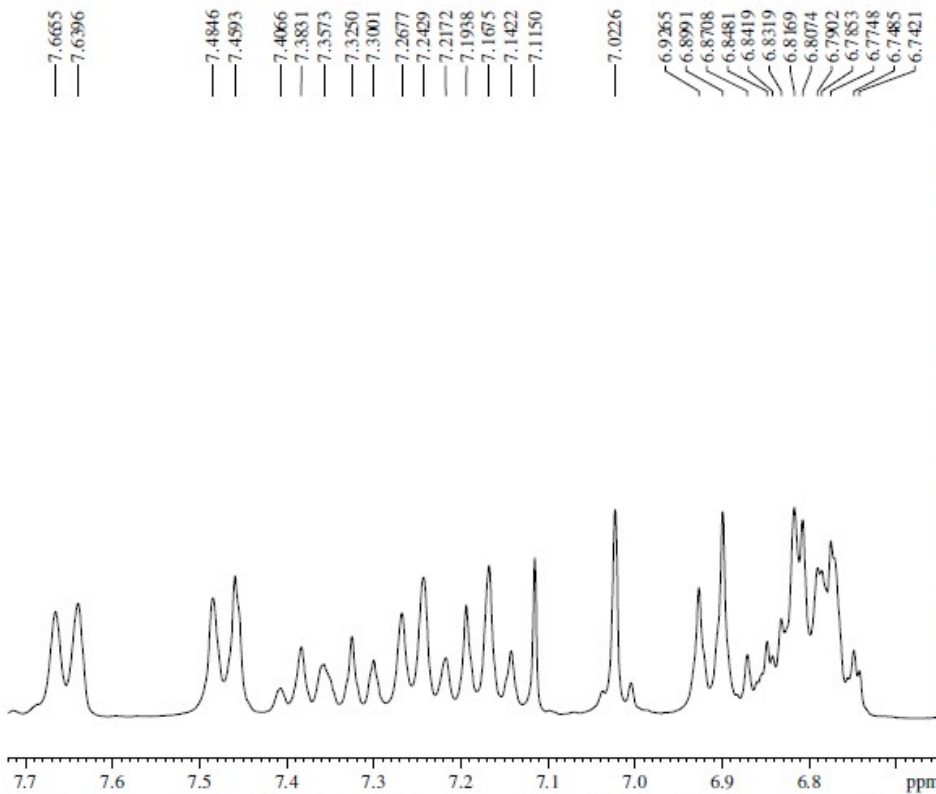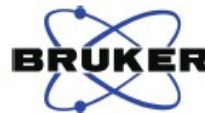

Current Data Parameters  
 NAME 06-Feb-AN-2020  
 EXPNO 330  
 PROCNO 1

F2 - Acquisition Parameters  
 Date\_ 20200206  
 Time 16.03  
 INSTRUM spect  
 PROBHD 5 mm QNP 1H/13  
 PULPROG zg30  
 TD 65536  
 SOLVENT CDCl3  
 NS 16  
 DS 2  
 SWH 6188.119 Hz  
 FIDRES 0.094423 Hz  
 AQ 5.2953086 sec  
 RG 203  
 DW 80.800 usec  
 DE 6.50 usec  
 TE 300.0 K  
 D1 1.00000000 sec  
 TD0 1

==== CHANNEL f1 ====  
 NUC1 1H  
 P1 13.95 usec  
 PL1 -1.00 dB  
 PL1W 15.02081871 W  
 SFO1 300.2598542 MHz

F2 - Processing parameters  
 SI 32768  
 SF 300.2580509 MHz  
 WDW EM  
 SSB 0  
 LB 0.30 Hz  
 GB 0  
 PC 1.00

S46: <sup>1</sup>H NMR spectrum of 3m (expansion)

NRLD-413

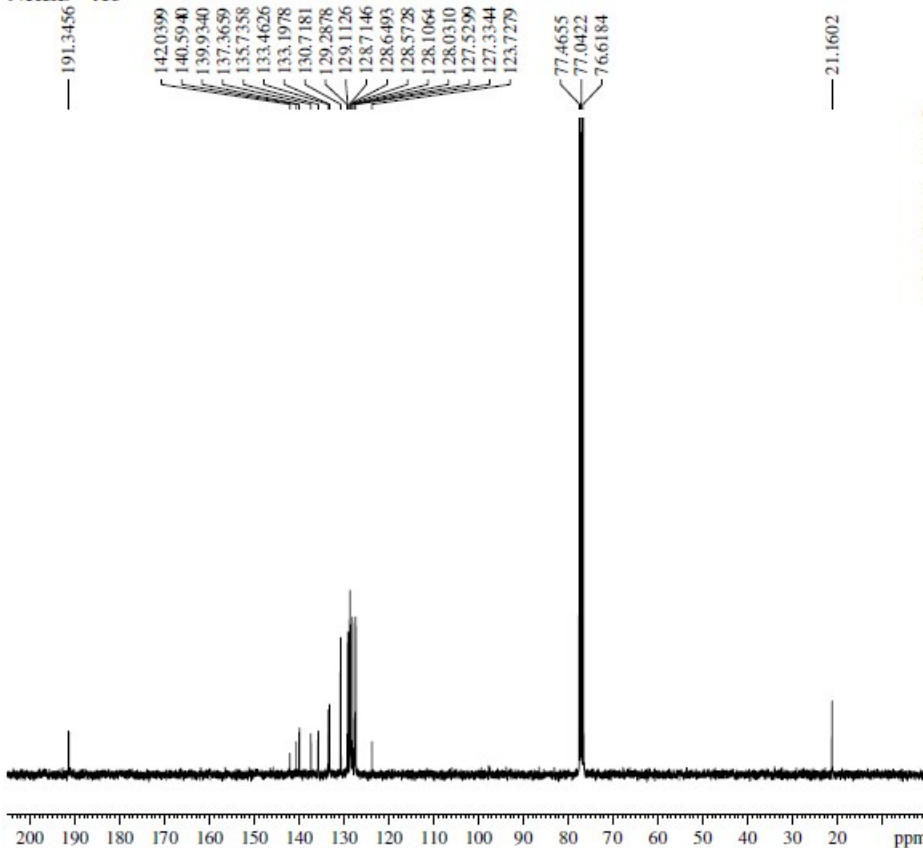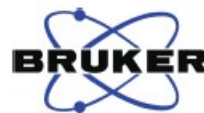

Current Data Parameters  
 NAME 06-Feb-AN-2020  
 EXPNO 340  
 PROCNO 1

F2 - Processing parameters  
 SI 32768  
 SF 75.4999337 MHz  
 WDW EM  
 SSB 0  
 LB 1.00 Hz  
 GB 0  
 PC 1.40

S47: <sup>13</sup>C NMR spectrum of 3m



NRLD-364

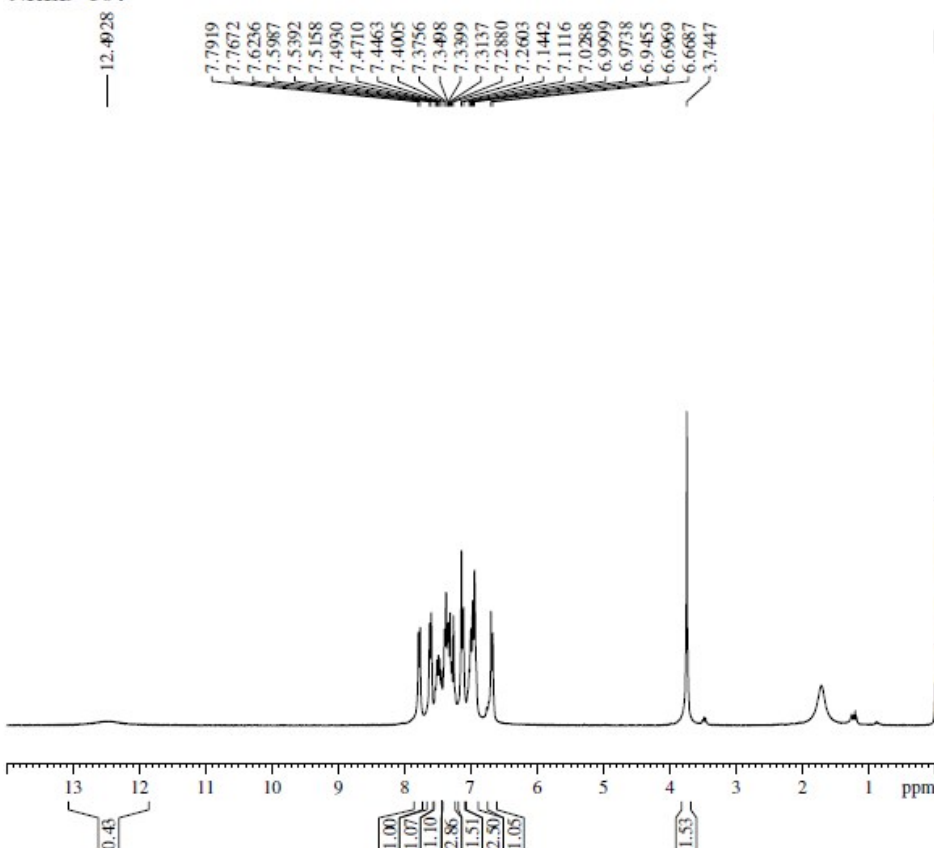

S48: <sup>1</sup>H NMR spectrum of 3n

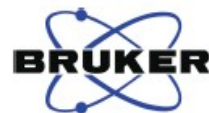

Current Data Parameters  
NAME 25-June-AN-2020  
EXPNO 510  
PROCNO 1

F2 - Acquisition Parameters  
Date\_ 20200625  
Time 15.49  
INSTRUM spect  
PROBHD 5 mm QNP 1H/13  
PULPROG zg30  
TD 65536  
SOLVENT CDCl3  
NS 16  
DS 2  
SWH 6188.119 Hz  
FIDRES 0.094423 Hz  
AQ 5.2953086 sec  
RG 228  
DW 80.800 usec  
DE 6.50 usec  
TE 300.0 K  
D1 1.00000000 sec  
TD0 1

==== CHANNEL f1 ====  
NUC1 1H  
P1 13.95 usec  
PL1 -1.00 dB  
PL1W 15.02081871 W  
SFO1 300.2598542 MHz

F2 - Processing parameters  
SI 32768  
SF 300.2580074 MHz  
WDW EM  
SSB 0  
LB 0.30 Hz  
GB 0  
PC 1.00

NRLD-364

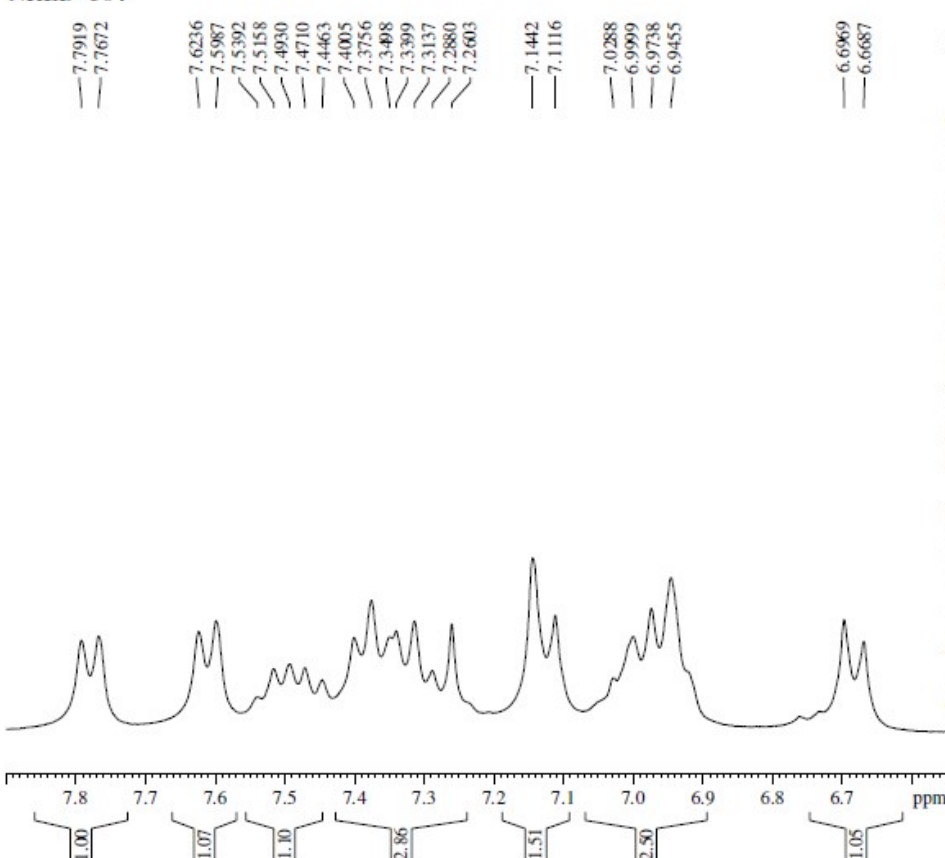

S49: <sup>1</sup>H NMR spectrum of 3n (expansion)

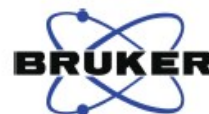

Current Data Parameters  
NAME 25-June-AN-2020  
EXPNO 510  
PROCNO 1

F2 - Acquisition Parameters  
Date\_ 20200625  
Time 15.49  
INSTRUM spect  
PROBHD 5 mm QNP 1H/13  
PULPROG zg30  
TD 65536  
SOLVENT CDCl3  
NS 16  
DS 2  
SWH 6188.119 Hz  
FIDRES 0.094423 Hz  
AQ 5.2953086 sec  
RG 228  
DW 80.800 usec  
DE 6.50 usec  
TE 300.0 K  
D1 1.00000000 sec  
TD0 1

==== CHANNEL f1 ====  
NUC1 1H  
P1 13.95 usec  
PL1 -1.00 dB  
PL1W 15.02081871 W  
SFO1 300.2598542 MHz

F2 - Processing parameters  
SI 32768  
SF 300.2580074 MHz  
WDW EM  
SSB 0  
LB 0.30 Hz  
GB 0  
PC 1.00

NRLD 364

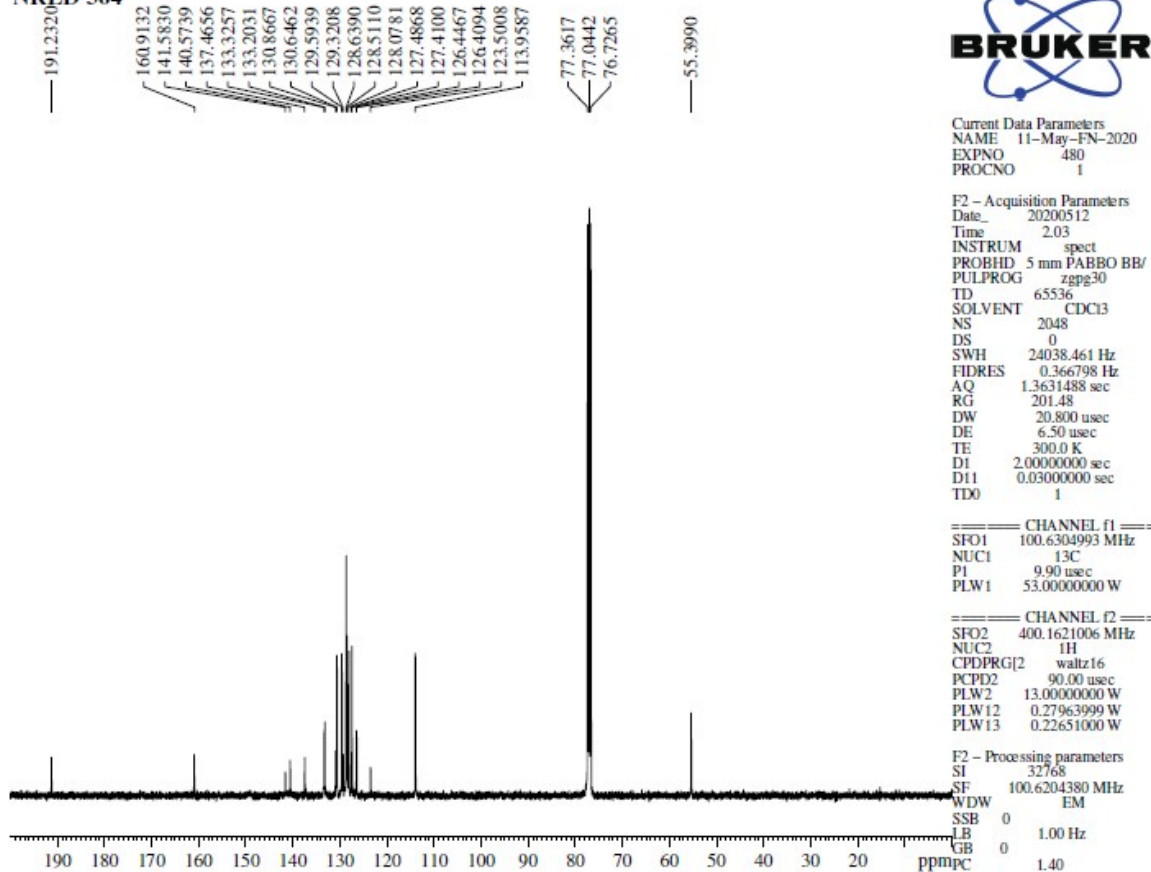

S50: <sup>13</sup>C NMR spectrum of 3n

NRLD-386

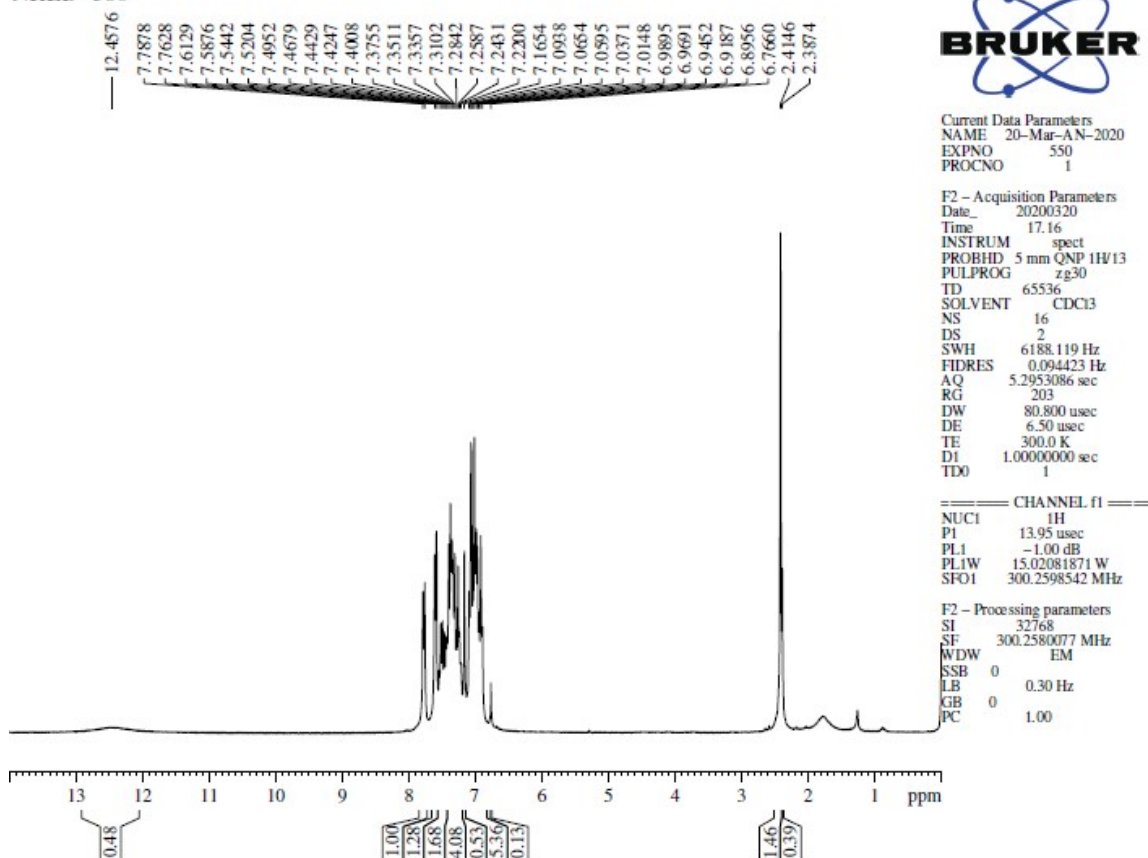

S51: <sup>1</sup>H NMR spectrum of 3o

NRLD-386

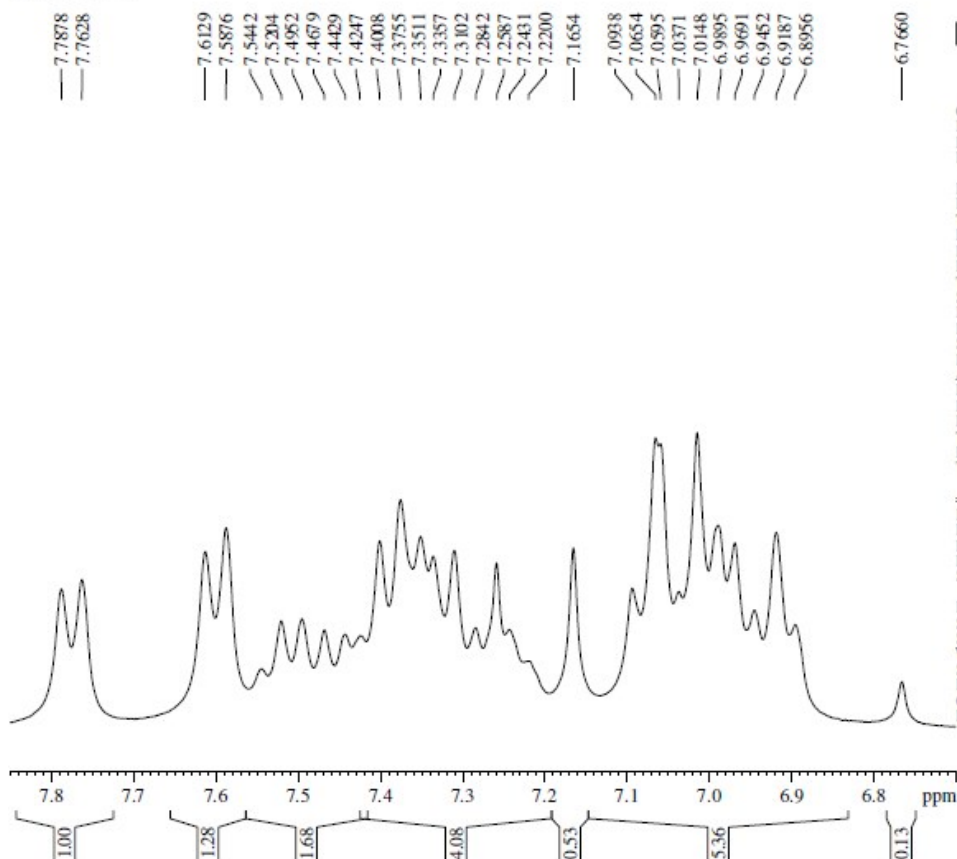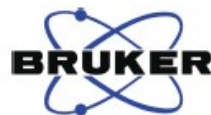

Current Data Parameters  
NAME 20-Mar-AN-2020  
EXPNO 550  
PROCNO 1

F2 - Acquisition Parameters  
Date\_ 20200320  
Time 17.16  
INSTRUM spect  
PROBHD 5 mm QNP 1H/13  
PULPROG zg30  
TD 65536  
SOLVENT CDCl3  
NS 16  
DS 2  
SWH 6188.119 Hz  
FIDRES 0.094423 Hz  
AQ 5.2953086 sec  
RG 203  
DW 80.800 usec  
DE 6.50 usec  
TE 300.0 K  
D1 1.0000000 sec  
TD0 1

==== CHANNEL f1 ====  
NUC1 1H  
P1 13.95 usec  
PL1 -1.00 dB  
PL1W 15.02081871 W  
SFO1 300.2598542 MHz

F2 - Processing parameters  
SI 32768  
SF 300.2580077 MHz  
WDW EM  
SSB 0  
LB 0.30 Hz  
GB 0  
PC 1.00

NRLD-386

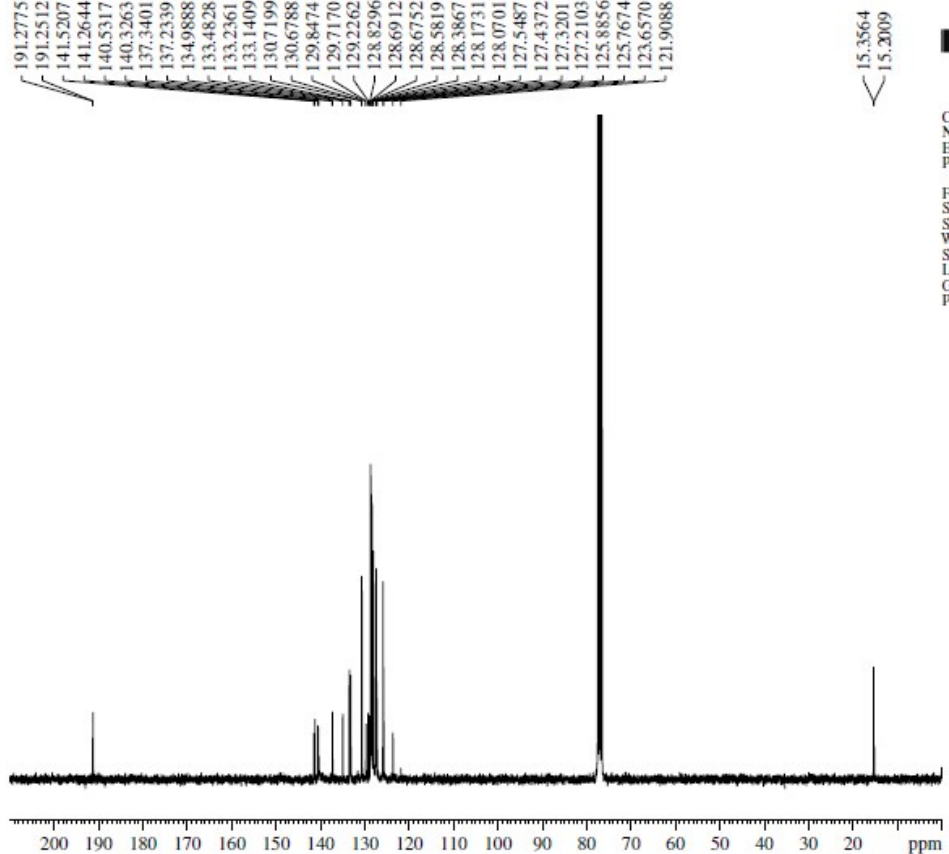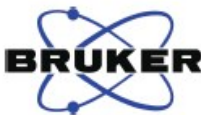

Current Data Parameters  
NAME 20-Mar-AN-2020  
EXPNO 560  
PROCNO 1

F2 - Processing parameters  
SI 32768  
SF 75.4999340 MHz  
WDW EM  
SSB 0  
LB 1.00 Hz  
GB 0  
PC 1.40



NRLD-376

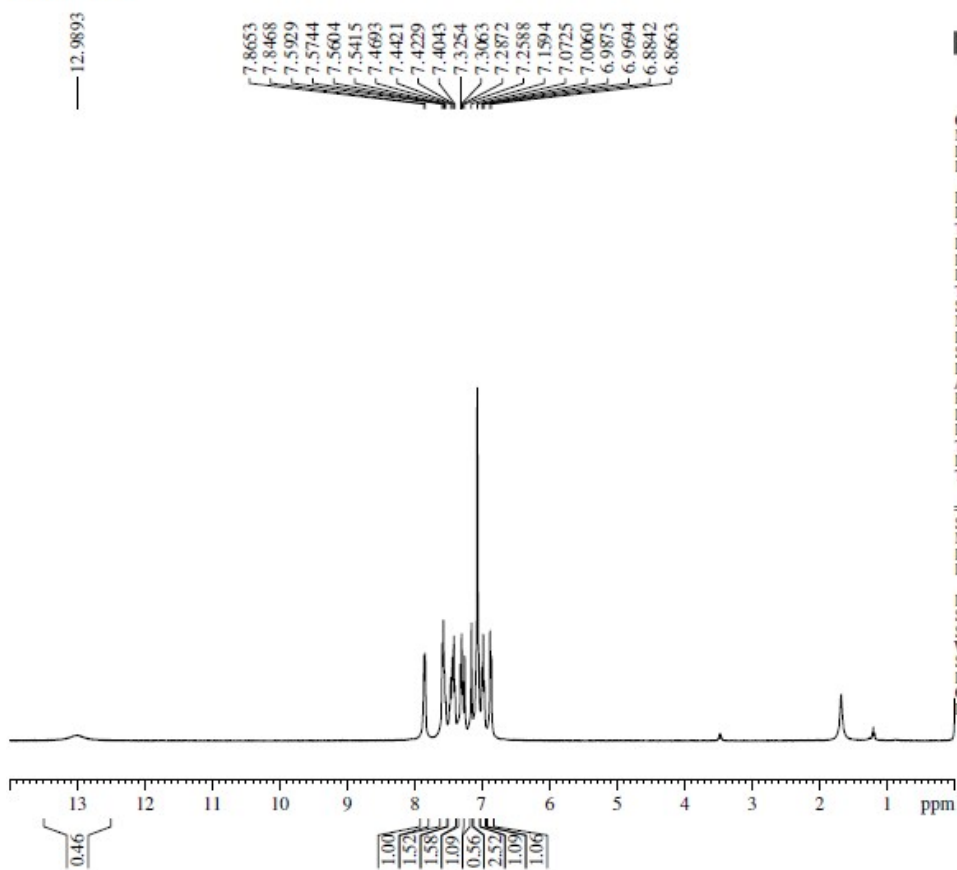

S54: <sup>1</sup>H NMR spectrum of 3p

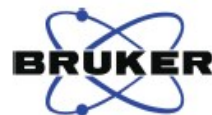

Current Data Parameters  
 NAME 11-May-FN-2020  
 EXPNO 460  
 PROCNO 1

F2 - Acquisition Parameters  
 Date\_ 20200511  
 Time 17.09  
 INSTRUM spect  
 PROBHD 5 mm PABBO BB/  
 PULPROG zg30  
 TD 65536  
 SOLVENT CDC13  
 NS 8  
 DS 0  
 SWH 9615.385 Hz  
 FIDRES 0.146719 Hz  
 AQ 3.4078720 sec  
 RG 129.57  
 DW 52.000 usec  
 DE 6.50 usec  
 TE 300.0 K  
 D1 1.00000000 sec  
 TD0 1

==== CHANNEL f1 ====  
 SFO1 400.1629712 MHz  
 NUC1 1H  
 P1 13.20 usec  
 PLW1 13.00000000 W

F2 - Processing parameters  
 SI 65536  
 SF 400.1605104 MHz  
 WDW EM  
 SSB 0  
 LB 0.30 Hz  
 GB 0  
 PC 1.00

NRLD-376

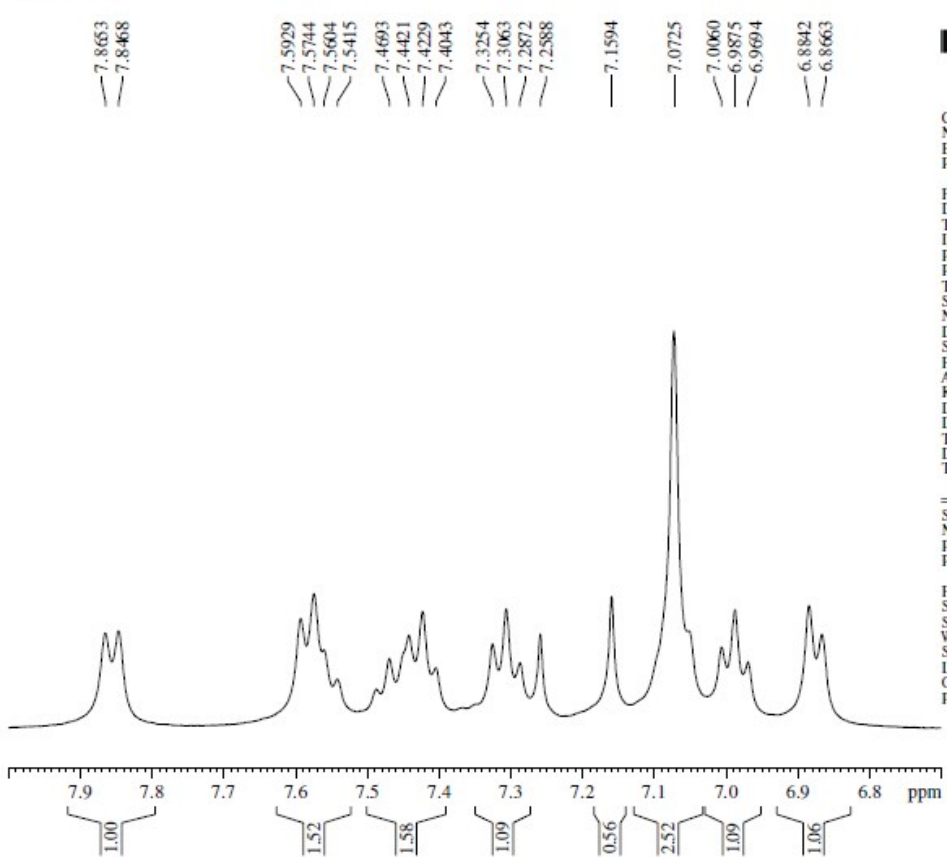

S55: <sup>1</sup>H NMR spectrum of 3p (expansion)

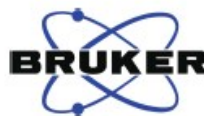

Current Data Parameters  
 NAME 11-May-FN-2020  
 EXPNO 460  
 PROCNO 1

F2 - Acquisition Parameters  
 Date\_ 20200511  
 Time 17.09  
 INSTRUM spect  
 PROBHD 5 mm PABBO BB/  
 PULPROG zg30  
 TD 65536  
 SOLVENT CDC13  
 NS 8  
 DS 0  
 SWH 9615.385 Hz  
 FIDRES 0.146719 Hz  
 AQ 3.4078720 sec  
 RG 129.57  
 DW 52.000 usec  
 DE 6.50 usec  
 TE 300.0 K  
 D1 1.00000000 sec  
 TD0 1

==== CHANNEL f1 ====  
 SFO1 400.1629712 MHz  
 NUC1 1H  
 P1 13.20 usec  
 PLW1 13.00000000 W

F2 - Processing parameters  
 SI 65536  
 SF 400.1605104 MHz  
 WDW EM  
 SSB 0  
 LB 0.30 Hz  
 GB 0  
 PC 1.00

NRLD-376

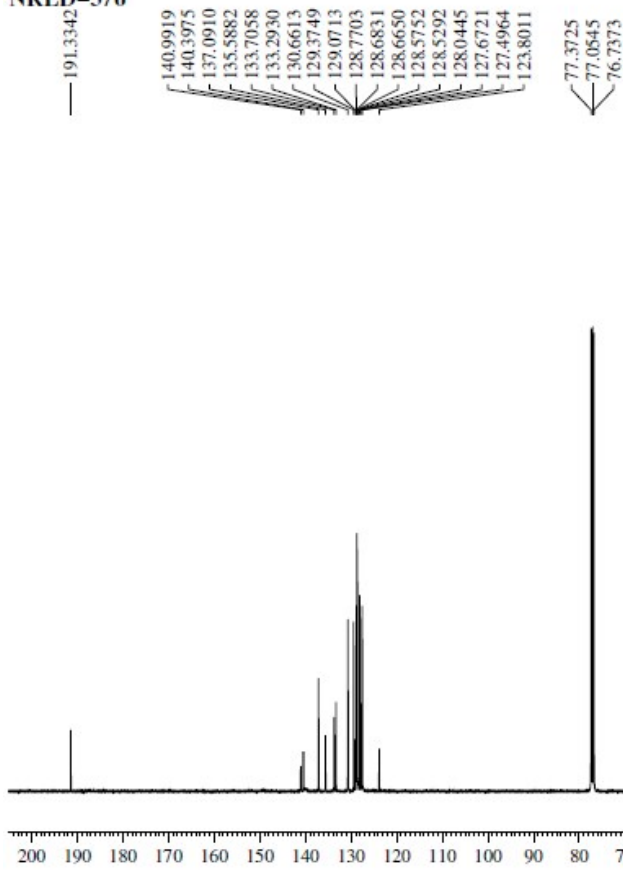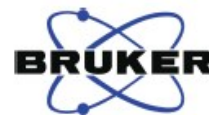

Current Data Parameters  
 NAME 31-OCT-AN-2019  
 EXPNO 370  
 PROCNO 1

F2 - Acquisition Parameters  
 Date\_ 20191101  
 Time 11.07  
 INSTRUM spect  
 PROBHD 5 mm PABBO BB/  
 PULPROG zgpg30  
 TD 65536  
 SOLVENT CDCl3  
 NS 2048  
 DS 4  
 SWH 24038.461 Hz  
 FIDRES 0.366798 Hz  
 AQ 1.3631488 sec  
 RG 201.48  
 DW 20.800 usec  
 DE 6.50 usec  
 TE 300.0 K  
 D1 2.0000000 sec  
 D11 0.0300000 sec  
 TD0 1

==== CHANNEL f1 ====  
 SFO1 100.6304993 MHz  
 NUC1 13C  
 P1 9.90 usec  
 PLW1 53.0000000 W  
 ==== CHANNEL f2 ====  
 SFO2 400.1621006 MHz  
 NUC2 1H  
 CPDPRG2 waltz16  
 PCPD2 90.00 usec  
 PLW2 13.0000000 W  
 PLW12 0.27963999 W  
 PLW13 0.22651000 W

F2 - Processing parameters  
 SI 32768  
 SF 100.6204380 MHz  
 WDW EM  
 SSB 0  
 LB 1.00 Hz  
 GB 0  
 PC 1.40

S56: <sup>13</sup>C NMR spectrum of 3p

NRLD-400

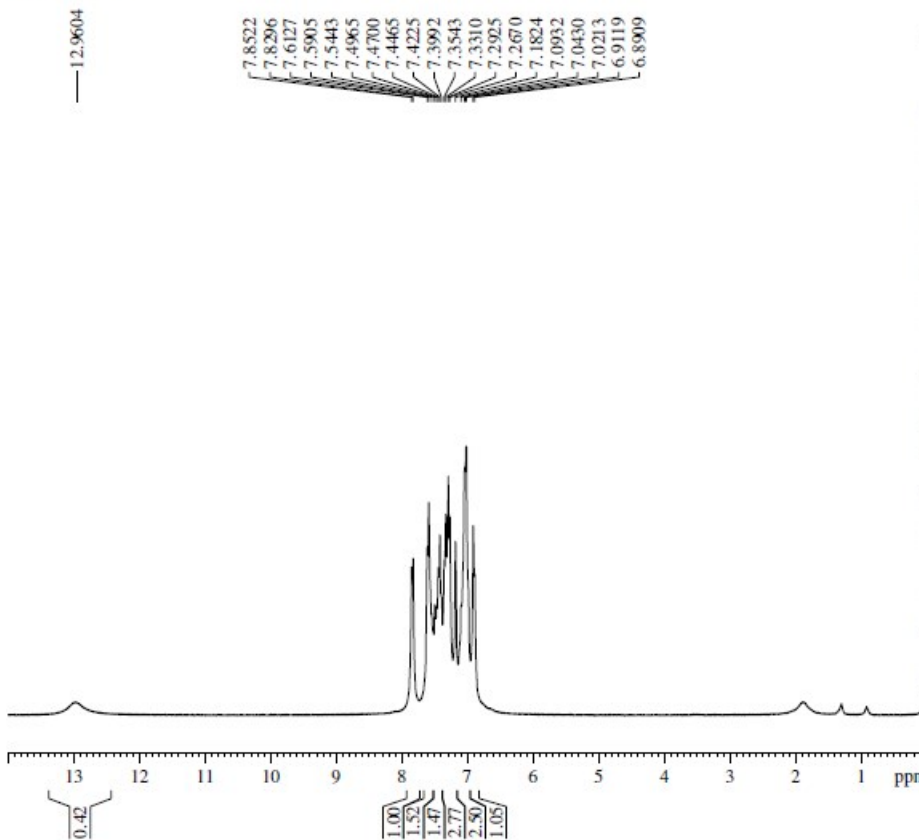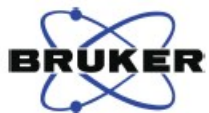

Current Data Parameters  
 NAME 23-Jan-FN-2020  
 EXPNO 600  
 PROCNO 1

F2 - Acquisition Parameters  
 Date\_ 20200123  
 Time 12.29  
 INSTRUM spect  
 PROBHD 5 mm QNP 1H/13  
 PULPROG zg30  
 TD 65536  
 SOLVENT CDCl3  
 NS 16  
 DS 2  
 SWH 6188.119 Hz  
 FIDRES 0.094423 Hz  
 AQ 5.2953086 sec  
 RG 181  
 DW 80.800 usec  
 DE 6.50 usec  
 TE 300.0 K  
 D1 1.0000000 sec  
 TD0 1

==== CHANNEL f1 ====  
 NUC1 1H  
 P1 13.95 usec  
 PL1 -1.00 dB  
 PL1W 15.02081871 W  
 SFO1 300.2598542 MHz  
 F2 - Processing parameters  
 SI 32768  
 SF 300.2579983 MHz  
 WDW EM  
 SSB 0  
 LB 0.30 Hz  
 GB 0  
 PC 1.00

S57: <sup>1</sup>H NMR spectrum of 3q

NRLD-400

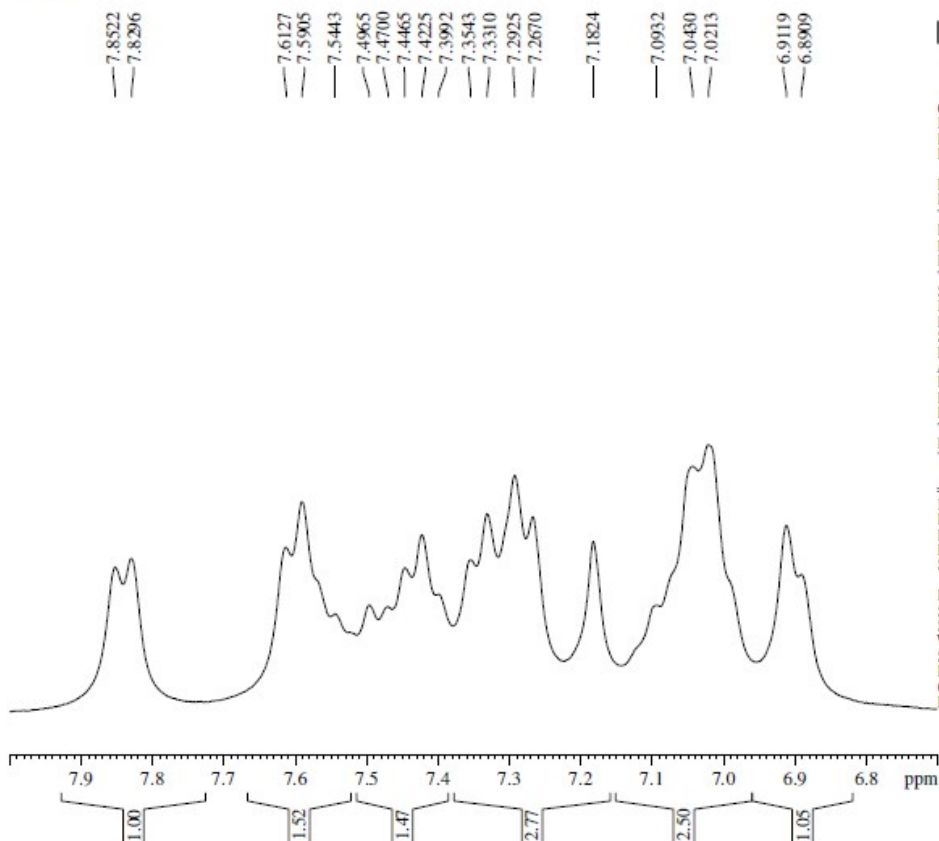

S58: <sup>1</sup>H NMR spectrum of 3q (expansion)

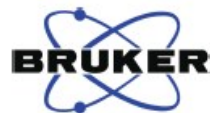

Current Data Parameters  
NAME 23-Jan-FN-2020  
EXPNO 600  
PROCNO 1

F2 - Acquisition Parameters  
Date\_ 20200123  
Time 12.29  
INSTRUM spect  
PROBHD 5 mm QNP 1H/13  
PULPROG zg30  
TD 65536  
SOLVENT CDCl3  
NS 16  
DS 2  
SWH 6188.119 Hz  
FIDRES 0.094423 Hz  
AQ 5.2953086 sec  
RG 181  
DW 80.800 usec  
DE 6.50 usec  
TE 300.0 K  
D1 1.0000000 sec  
TD0 1

==== CHANNEL f1 ====  
NUC1 1H  
P1 13.95 usec  
PL1 -1.00 dB  
PL1W 15.02081871 W  
SFO1 300.2598542 MHz

F2 - Processing parameters  
SI 32768  
SF 300.2579983 MHz  
WDW EM  
SSB 0  
LB 0.30 Hz  
GB 0  
PC 1.00

NRLD-400

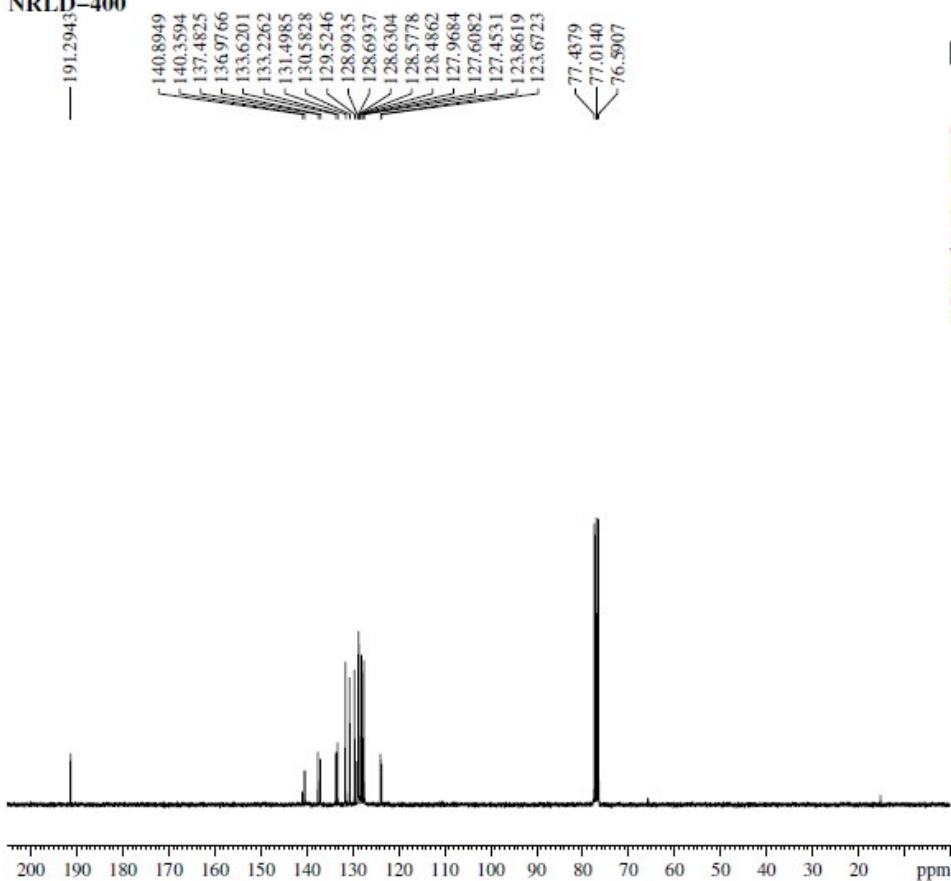

S59: <sup>13</sup>C NMR spectrum of 3q

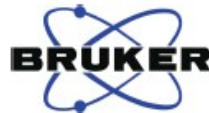

Current Data Parameters  
NAME 17-Jan-AN-2020  
EXPNO 330  
PROCNO 1

F2 - Processing parameters  
SI 32768  
SF 75.4999390 MHz  
WDW EM  
SSB 0  
LB 1.00 Hz  
GB 0  
PC 1.40

NRLD-383

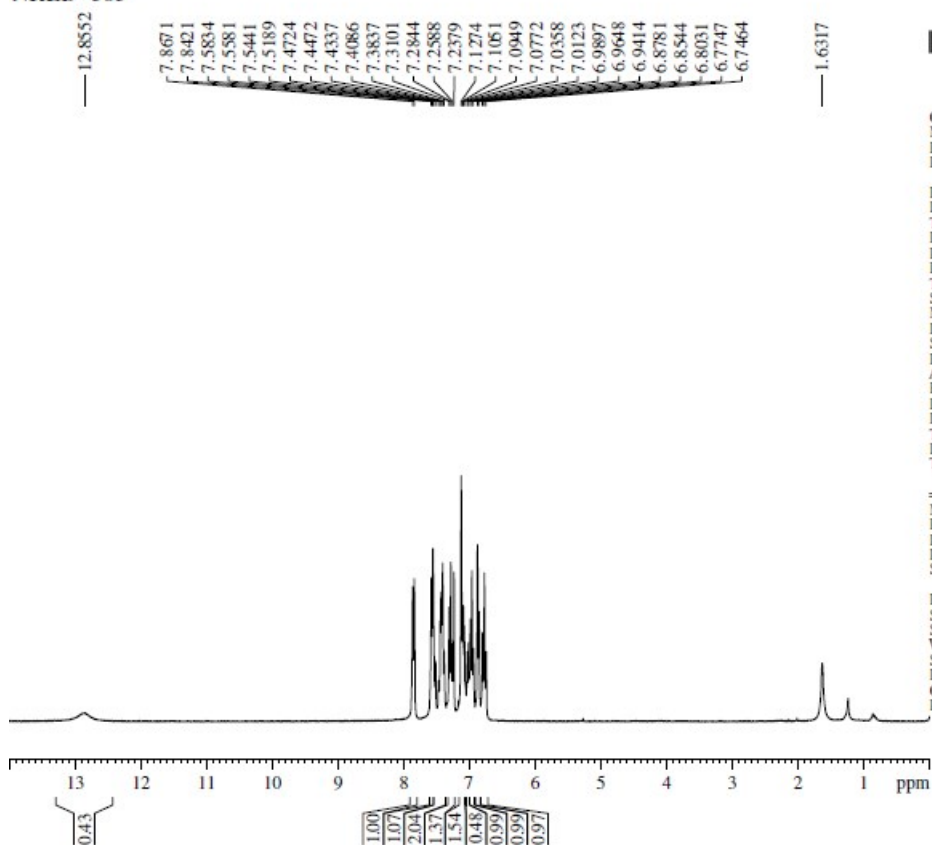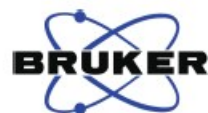

Current Data Parameters  
NAME 29-Jan-FN-2020  
EXPNO 440  
PROCNO 1

F2 - Acquisition Parameters  
Date\_ 20200129  
Time 10.53  
INSTRUM spect  
PROBHD 5 mm QNP 1H/13  
PULPROG zg30  
TD 65536  
SOLVENT CDCl3  
NS 16  
DS 2  
SWH 6188.119 Hz  
FIDRES 0.094423 Hz  
AQ 5.2953086 sec  
RG 256  
DW 80.800 usec  
DE 6.50 usec  
TE 300.0 K  
D1 1.00000000 sec  
TD0 1

==== CHANNEL f1 ====  
NUC1 1H  
P1 13.95 usec  
PL1 -1.00 dB  
PL1W 15.02081871 W  
SFO1 300.2598542 MHz

F2 - Processing parameters  
SI 32768  
SF 300.2580139 MHz  
WDW EM  
SSB 0  
LB 0.30 Hz  
GB 0  
PC 1.00

S60: <sup>1</sup>H NMR spectrum of 3r

NRLD-383

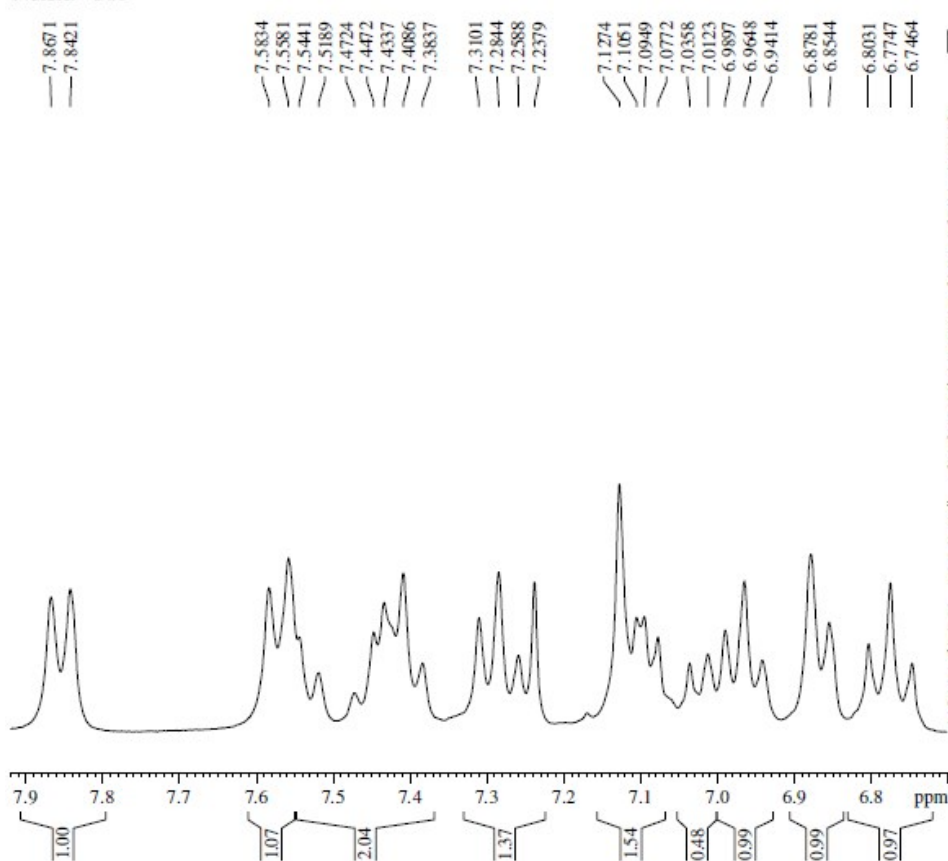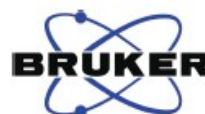

Current Data Parameters  
NAME 29-Jan-FN-2020  
EXPNO 440  
PROCNO 1

F2 - Acquisition Parameters  
Date\_ 20200129  
Time 10.53  
INSTRUM spect  
PROBHD 5 mm QNP 1H/13  
PULPROG zg30  
TD 65536  
SOLVENT CDCl3  
NS 16  
DS 2  
SWH 6188.119 Hz  
FIDRES 0.094423 Hz  
AQ 5.2953086 sec  
RG 256  
DW 80.800 usec  
DE 6.50 usec  
TE 300.0 K  
D1 1.00000000 sec  
TD0 1

==== CHANNEL f1 ====  
NUC1 1H  
P1 13.95 usec  
PL1 -1.00 dB  
PL1W 15.02081871 W  
SFO1 300.2598542 MHz

F2 - Processing parameters  
SI 32768  
SF 300.2580139 MHz  
WDW EM  
SSB 0  
LB 0.30 Hz  
GB 0  
PC 1.00

S61: <sup>1</sup>H NMR spectrum of 3r (expansion)

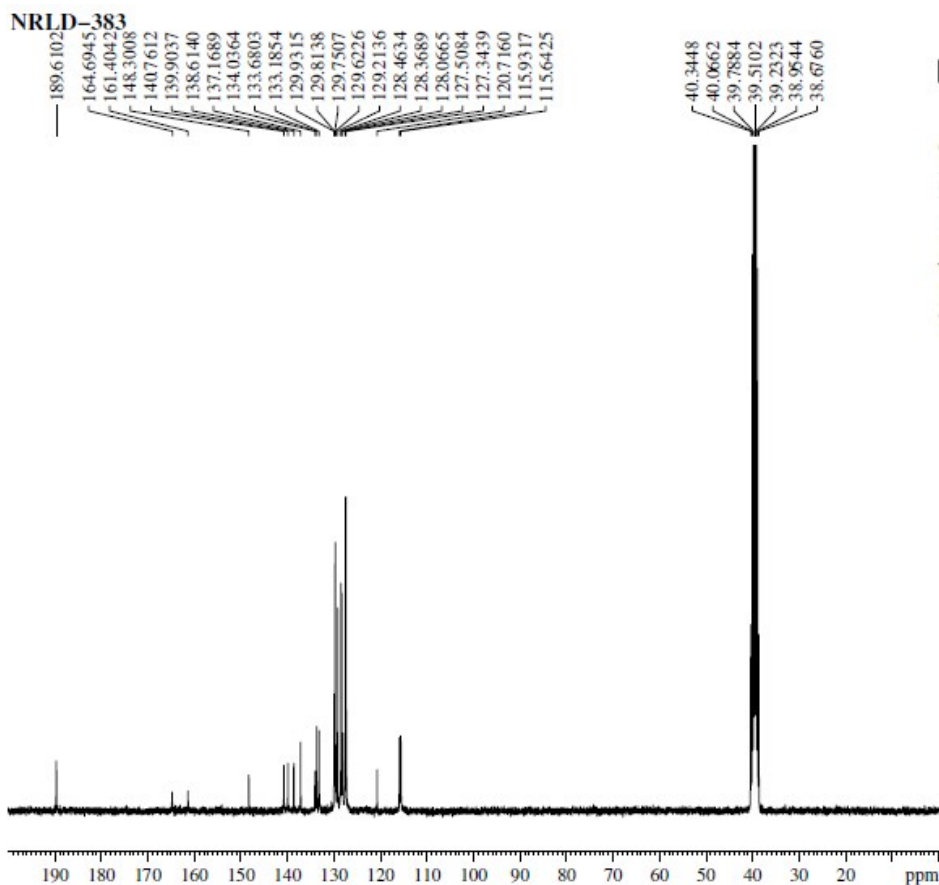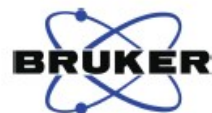

Current Data Parameters  
NAME 31-Jan-AN-2020  
EXPNO 570  
PROCNO 1

F2 - Processing parameters  
SI 32768  
SF 75.4999686 MHz  
WDW EM  
SSB 0  
LB 1.00 Hz  
GB 0  
PC 1.40

**S62: <sup>13</sup>C NMR spectrum of 3r**

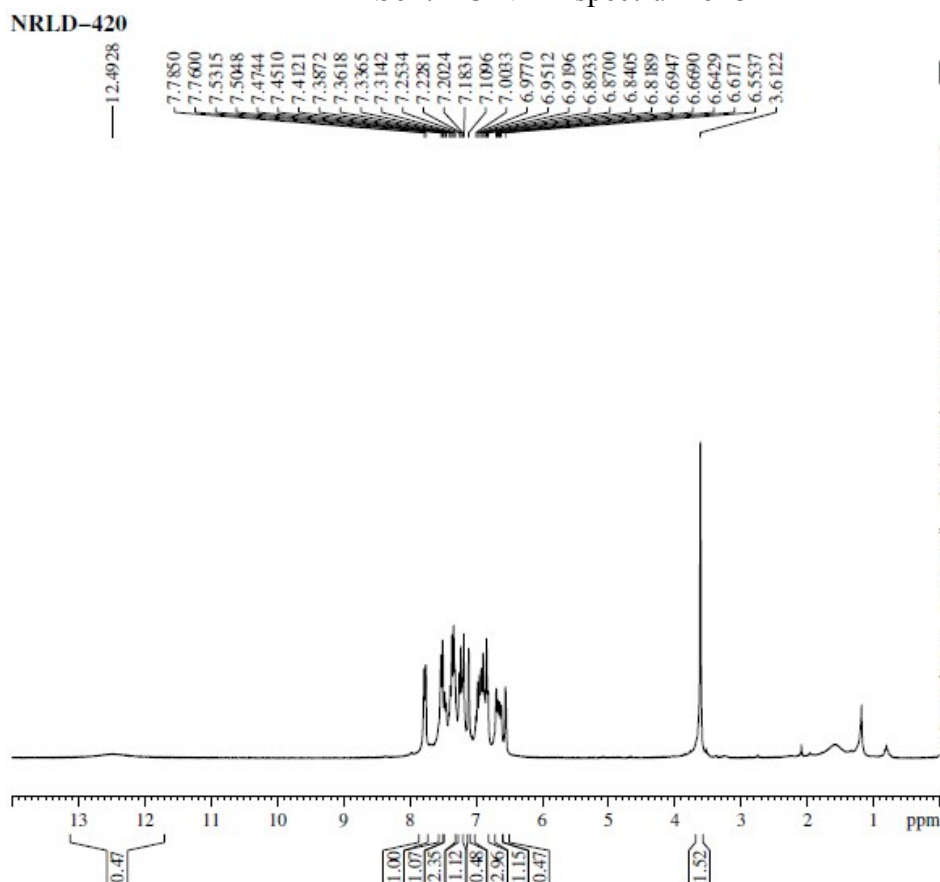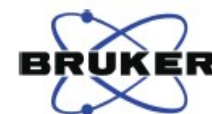

Current Data Parameters  
NAME 17-FEB-FN-2020  
EXPNO 420  
PROCNO 1

F2 - Acquisition Parameters  
Date\_ 20200217  
Time 22.48  
INSTRUM spect  
PROBHD 5 mm QNP 1H/13  
PULPROG zg30  
TD 65536  
SOLVENT CDCl3  
NS 64  
DS 2  
SWH 6188.119 Hz  
FIDRES 0.094423 Hz  
AQ 5.2953086 sec  
RG 228  
DW 80.800 usec  
DE 6.50 usec  
TE 300.0 K  
D1 1.00000000 sec  
TD0 1

==== CHANNEL f1 ====  
NUC1 1H  
P1 13.95 usec  
PL1 -1.00 dB  
PL1W 15.02081871 W  
SFO1 300.2598542 MHz

F2 - Processing parameters  
SI 32768  
SF 300.2580304 MHz  
WDW EM  
SSB 0  
LB 0.30 Hz  
GB 0  
PC 1.00

**S63: <sup>1</sup>H NMR spectrum of 3s**



NRLD-420

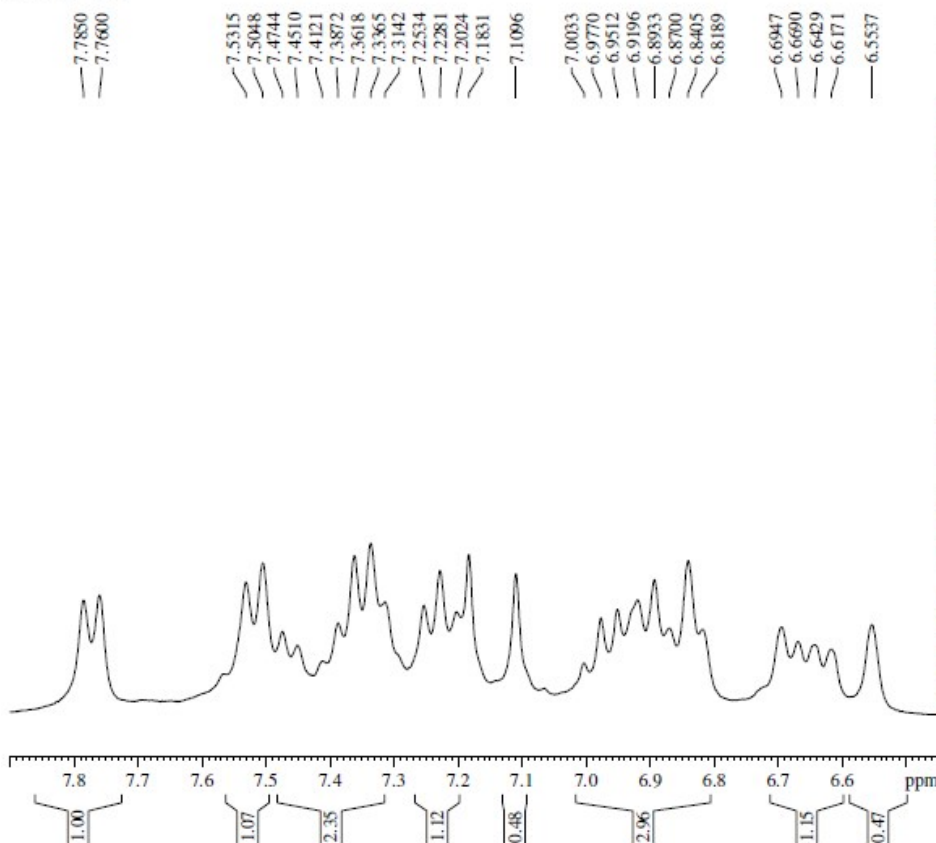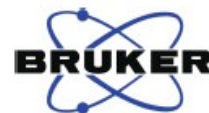

Current Data Parameters  
NAME 17-FEB-FN-2020  
EXPNO 420  
PROCNO 1

F2 - Acquisition Parameters  
Date\_ 20200217  
Time 22.48  
INSTRUM spect  
PROBHD 5 mm QNP 1H/13  
PULPROG zg30  
TD 65536  
SOLVENT CDCl3  
NS 64  
DS 2  
SWH 6188.119 Hz  
FIDRES 0.094423 Hz  
AQ 5.2953086 sec  
RG 228  
DW 80.800 usec  
DE 6.50 usec  
TE 300.0 K  
D1 1.0000000 sec  
TD0 1

==== CHANNEL f1 ====  
NUC1 1H  
P1 13.95 usec  
PL1 -1.00 dB  
PL1W 15.02081871 W  
SFO1 300.2598542 MHz

F2 - Processing parameters  
SI 32768  
SF 300.2580304 MHz  
WDW EM  
SSB 0  
LB 0.30 Hz  
GB 0  
PC 1.00

S64: <sup>1</sup>H NMR spectrum of 3s (expansion)

NRLD-420

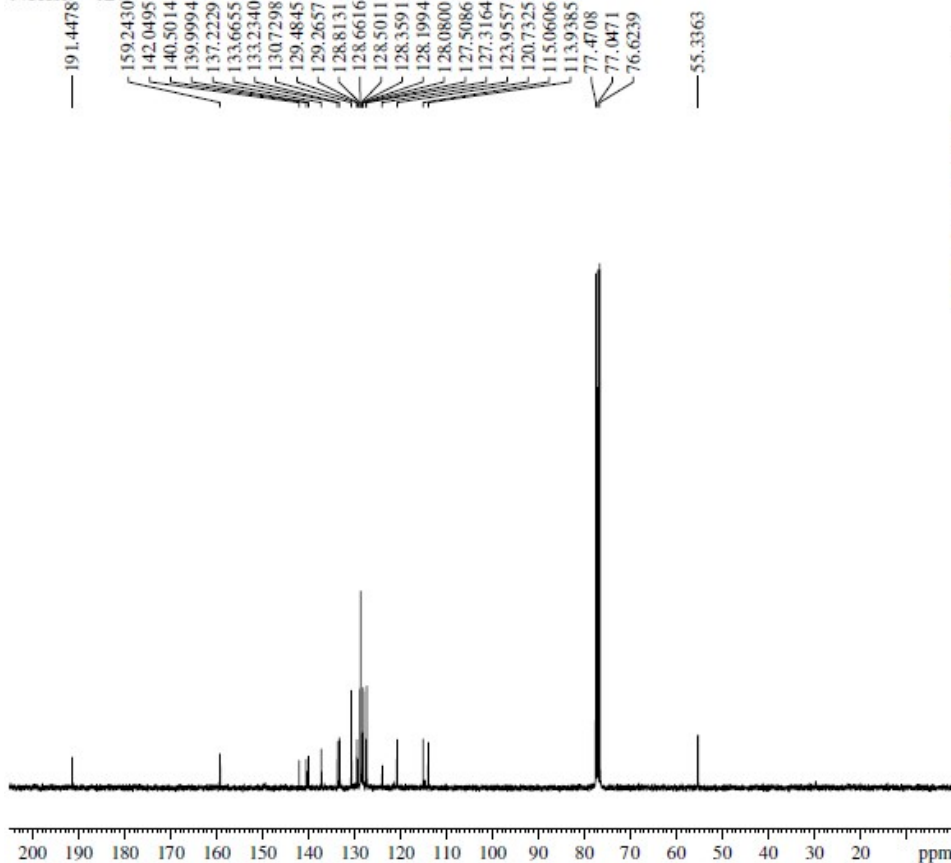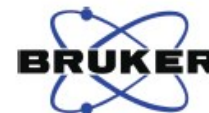

Current Data Parameters  
NAME 20-Feb-FN-2020  
EXPNO 460  
PROCNO 1

F2 - Processing parameters  
SI 32768  
SF 75.4999337 MHz  
WDW EM  
SSB 0  
LB 1.00 Hz  
GB 0  
PC 1.40

S65: <sup>13</sup>C NMR spectrum of 3s

NRLD-371

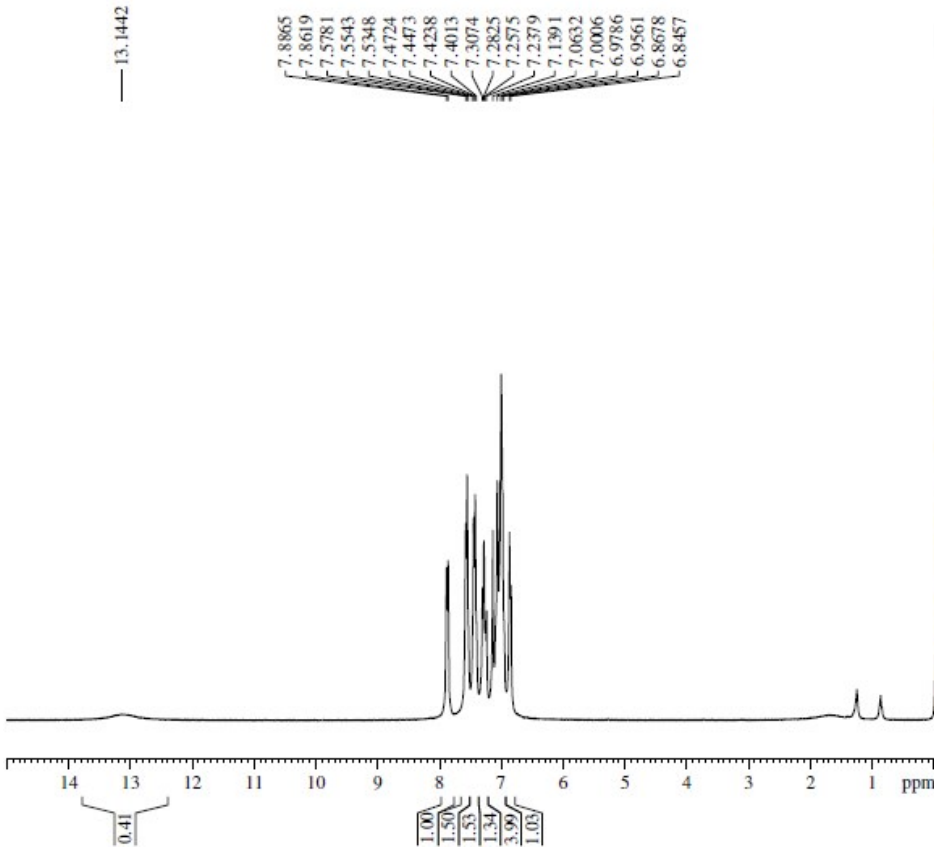

S66: <sup>1</sup>H NMR spectrum of 3t

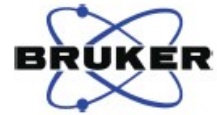

Current Data Parameters  
 NAME 11-FEB-AN-2020  
 EXPNO 530  
 PROCNO 1

F2 - Acquisition Parameters  
 Date\_ 20200211  
 Time 11.53  
 INSTRUM spect  
 PROBHD 5 mm QNP 1H/13  
 PULPROG zg30  
 TD 65536  
 SOLVENT CDCl3  
 NS 16  
 DS 2  
 SWH 6188.119 Hz  
 FIDRES 0.094423 Hz  
 AQ 5.2953086 sec  
 RG 228  
 DW 80.800 usec  
 DE 6.50 usec  
 TE 300.0 K  
 D1 1.00000000 sec  
 TDO 1

==== CHANNEL f1 ====  
 NUC1 1H  
 P1 13.95 usec  
 PL1 -1.00 dB  
 PL1W 15.02081871 W  
 SFO1 300.2598542 MHz

F2 - Processing parameters  
 SI 32768  
 SF 300.2580139 MHz  
 WDW EM  
 SSB 0  
 LB 0.30 Hz  
 GB 0  
 PC 1.00

NRLD-371

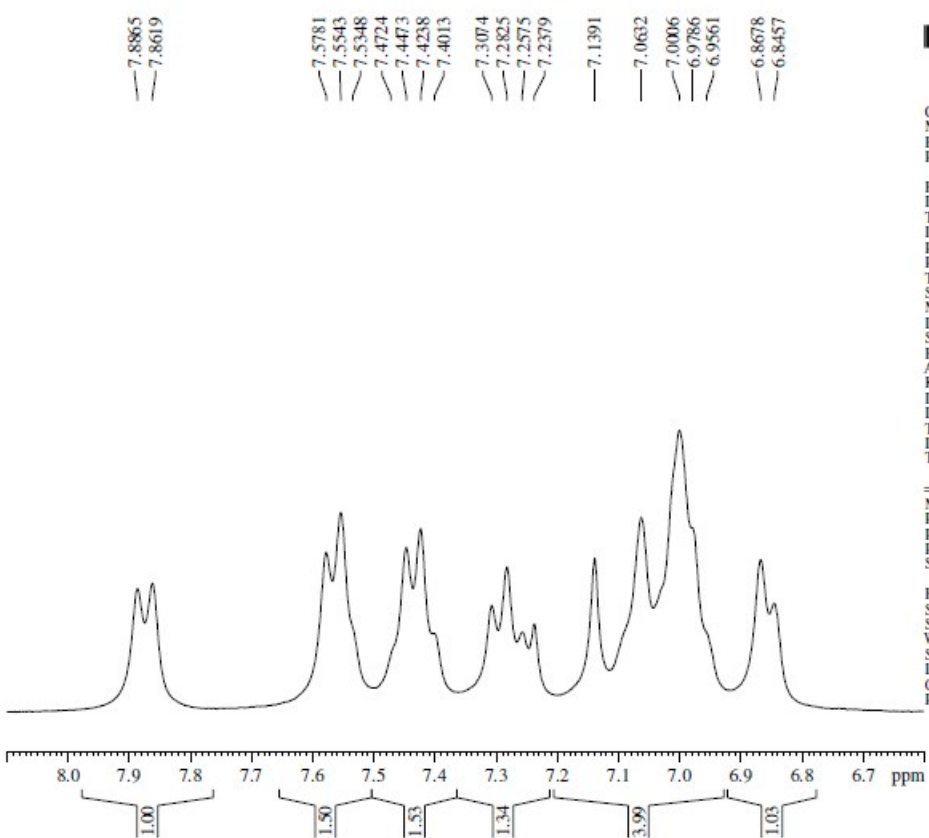

S67: <sup>1</sup>H NMR spectrum of 3t (expansion)

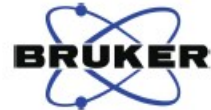

Current Data Parameters  
 NAME 11-FEB-AN-2020  
 EXPNO 530  
 PROCNO 1

F2 - Acquisition Parameters  
 Date\_ 20200211  
 Time 11.53  
 INSTRUM spect  
 PROBHD 5 mm QNP 1H/13  
 PULPROG zg30  
 TD 65536  
 SOLVENT CDCl3  
 NS 16  
 DS 2  
 SWH 6188.119 Hz  
 FIDRES 0.094423 Hz  
 AQ 5.2953086 sec  
 RG 228  
 DW 80.800 usec  
 DE 6.50 usec  
 TE 300.0 K  
 D1 1.00000000 sec  
 TDO 1

==== CHANNEL f1 ====  
 NUC1 1H  
 P1 13.95 usec  
 PL1 -1.00 dB  
 PL1W 15.02081871 W  
 SFO1 300.2598542 MHz

F2 - Processing parameters  
 SI 32768  
 SF 300.2580139 MHz  
 WDW EM  
 SSB 0  
 LB 0.30 Hz  
 GB 0  
 PC 1.00

NRLD-371

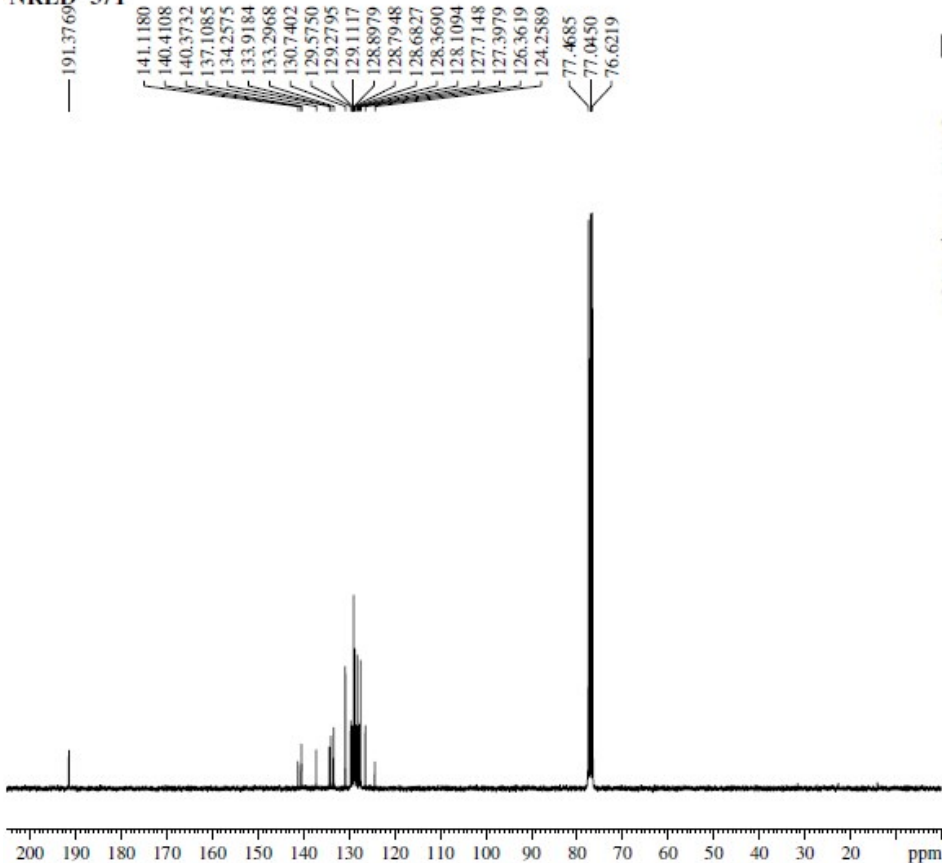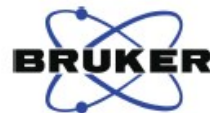

Current Data Parameters  
 NAME 11-FEB-AN-2020  
 EXPNO 470  
 PROCNO 1

F2 - Processing parameters  
 SI 32768  
 SF 75.4999332 MHz  
 WDW EM  
 SSB 0  
 LB 1.00 Hz  
 GB 0  
 PC 1.40

S68: <sup>13</sup>C NMR spectrum of 3t

NRLD-407

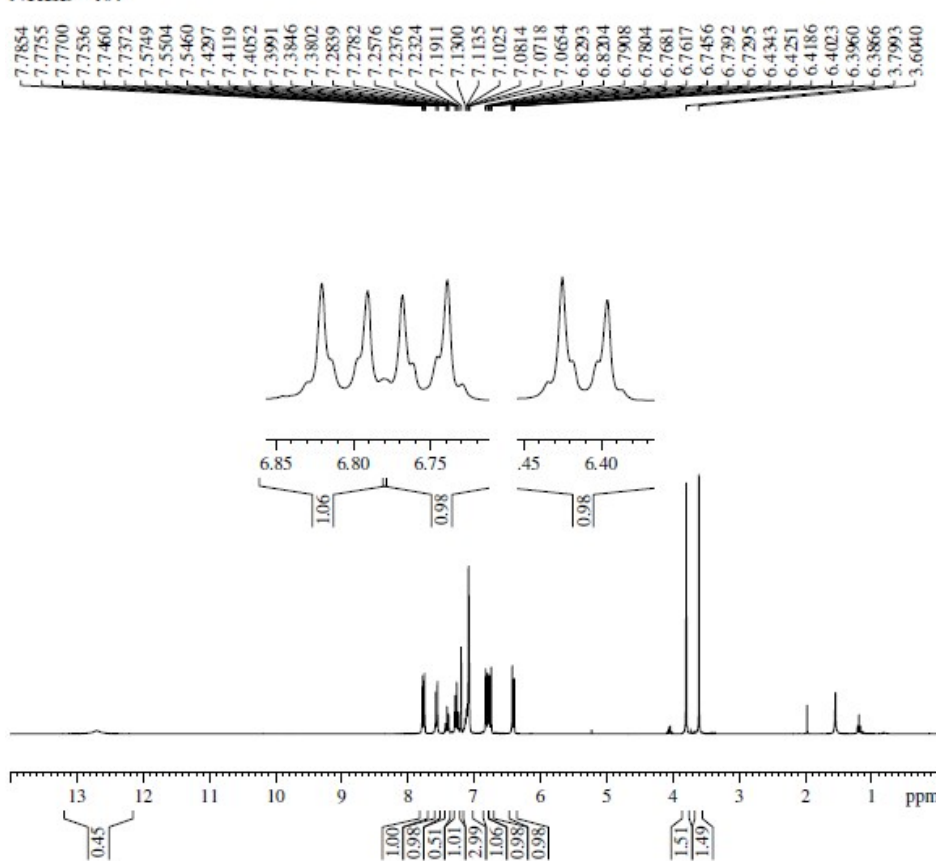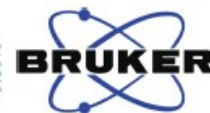

Current Data Parameters  
 NAME 30-Jan-FN-2020  
 EXPNO 530  
 PROCNO 1

F2 - Acquisition Parameters  
 Date\_ 20200130  
 Time 11.40  
 INSTRUM spect  
 PROBHD 5 mm QNP 1H/13  
 PULPROG zg30  
 TD 65536  
 SOLVENT CDCl3  
 NS 16  
 DS 2  
 SWH 6188.119 Hz  
 FIDRES 0.094423 Hz  
 AQ 5.2953086 sec  
 RG 203  
 DW 80.800 usec  
 DE 6.50 usec  
 TE 300.0 K  
 DI 1.00000000 sec  
 TDO 1

==== CHANNEL f1 ====  
 NUC1 1H  
 P1 13.95 usec  
 PL1 -1.00 dB  
 PL1W 15.02081871 W  
 SFO1 300.2598542 MHz

F2 - Processing parameters  
 SI 32768  
 SF 300.2580280 MHz  
 WDW EM  
 SSB 0  
 LB 0.30 Hz  
 GB 0  
 PC 1.00

S69: <sup>1</sup>H NMR spectrum of 3u



NRLD-407

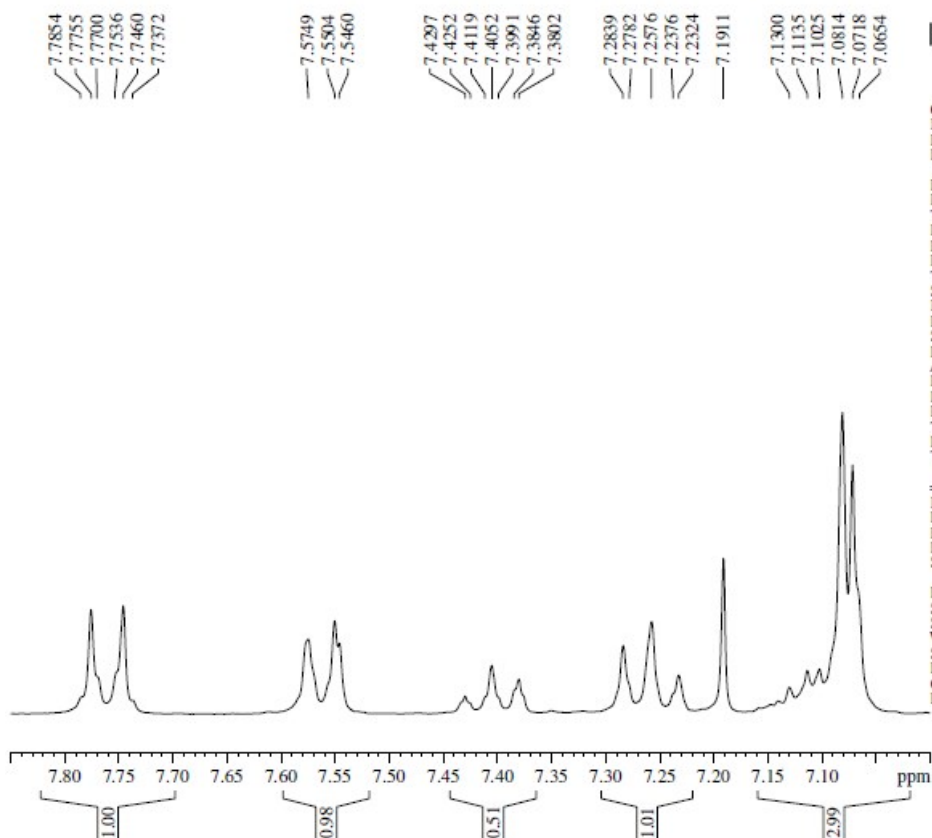

S70: <sup>1</sup>H NMR spectrum of **3u** (expansion)

NRLD-407

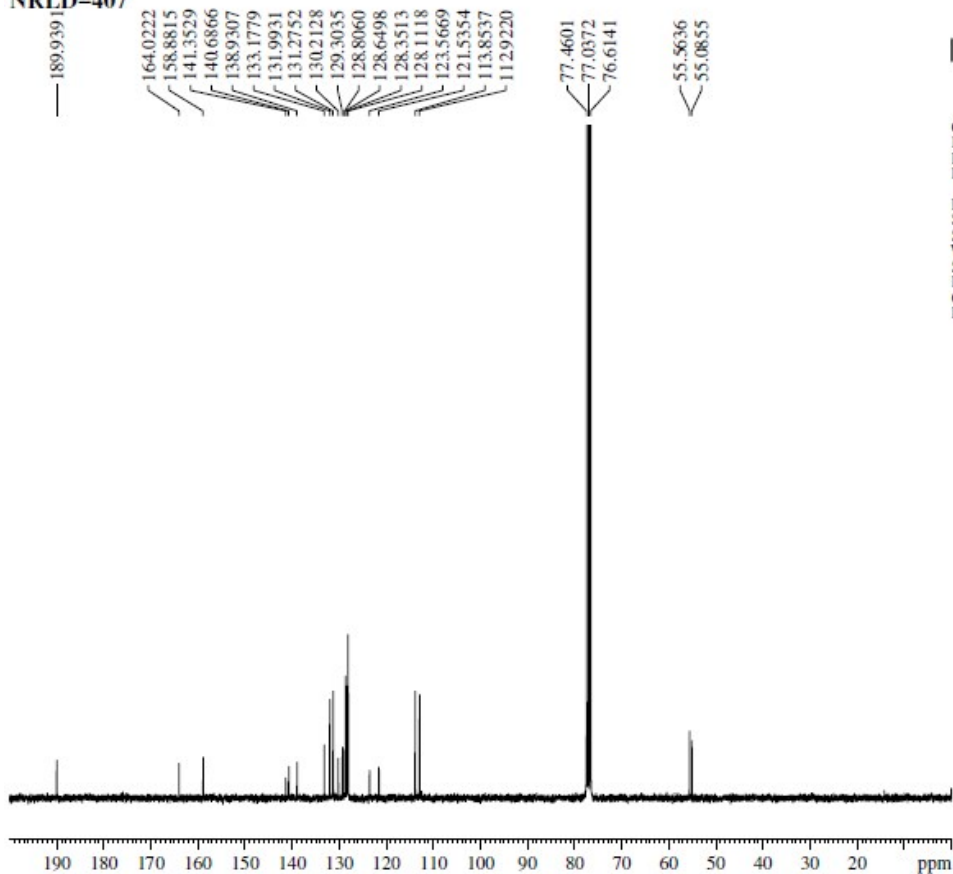

S71: <sup>13</sup>C NMR spectrum of **3u**

NRLD-418

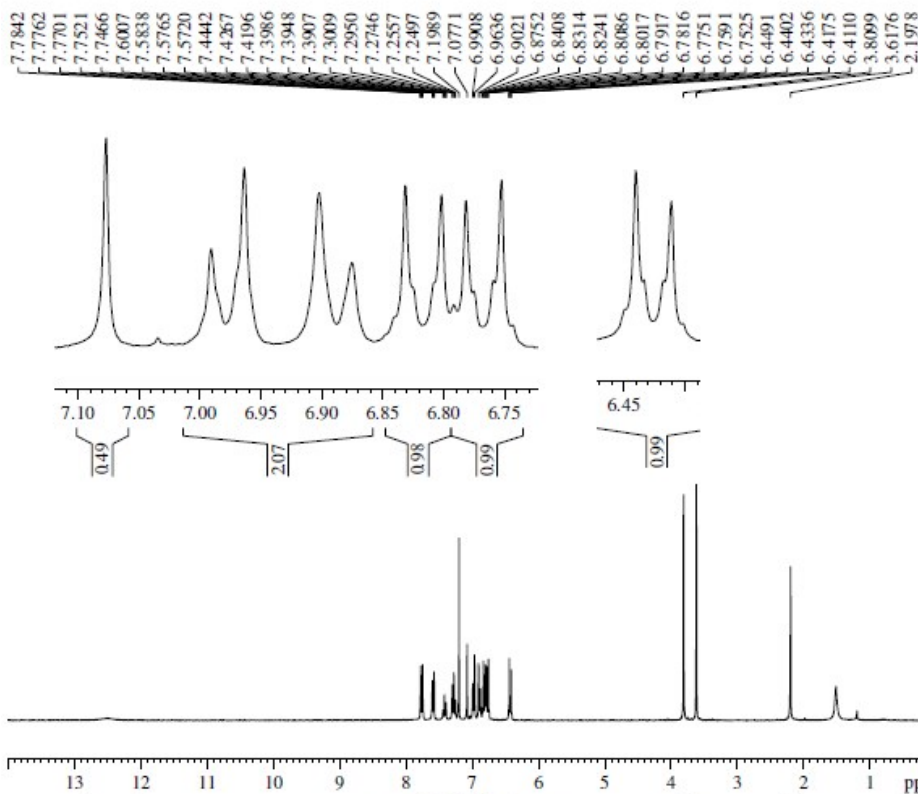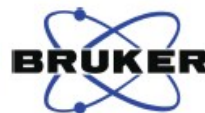

Current Data Parameters  
 NAME 13-FEB-FN-2020  
 EXPNO 450  
 PROCNO 1

F2 - Acquisition Parameters  
 Date\_ 20200213  
 Time 10.43  
 INSTRUM spect  
 PROBHD 5 mm QNP 1H/13  
 PULPROG zg30  
 TD 65536  
 SOLVENT CDCl3  
 NS 16  
 DS 2  
 SWH 6188.119 Hz  
 FIDRES 0.094423 Hz  
 AQ 5.2953086 sec  
 RG 322  
 DW 80.800 usec  
 DE 6.50 usec  
 TE 300.0 K  
 D1 1.00000000 sec  
 TD0 1

==== CHANNEL f1 ====  
 NUC1 1H  
 P1 13.95 usec  
 PL1 -1.00 dB  
 PL1W 15.02081871 W  
 SFO1 300.2598542 MHz

F2 - Processing parameters  
 SI 32768  
 SF 300.2580257 MHz  
 WDW EM  
 SSB 0  
 LB 0.30 Hz  
 GB 0  
 PC 1.00

S72: <sup>1</sup>H NMR spectrum of 3v

NRLD-418

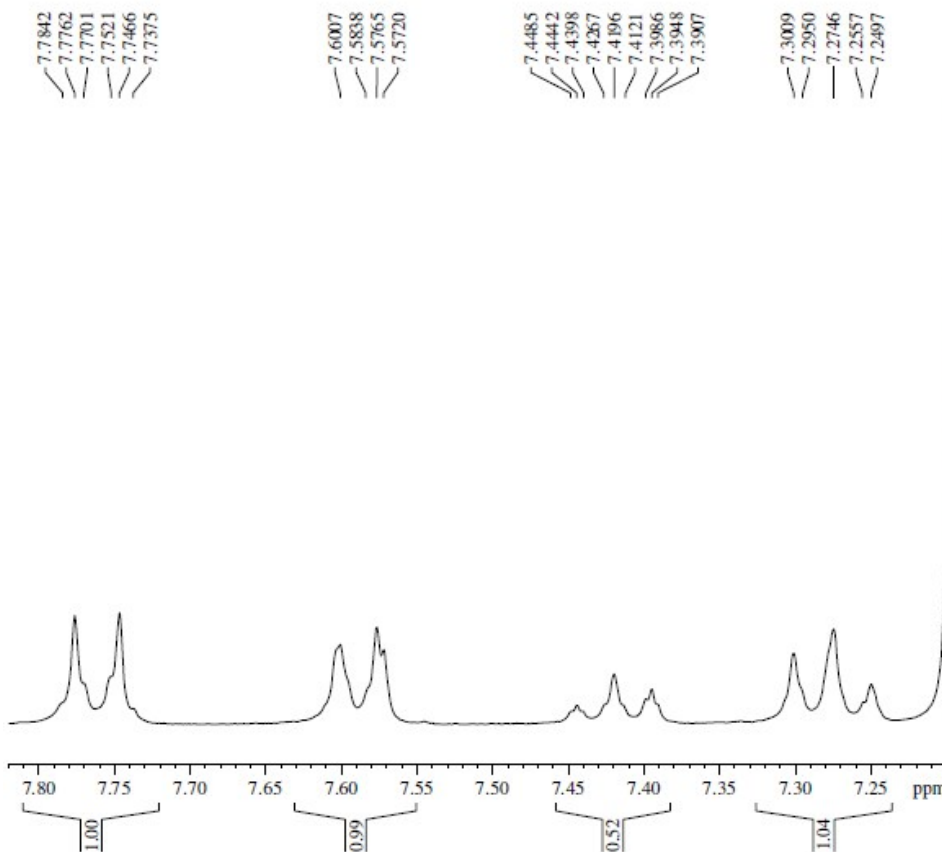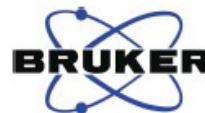

Current Data Parameters  
 NAME 13-FEB-FN-2020  
 EXPNO 450  
 PROCNO 1

F2 - Acquisition Parameters  
 Date\_ 20200213  
 Time 10.43  
 INSTRUM spect  
 PROBHD 5 mm QNP 1H/13  
 PULPROG zg30  
 TD 65536  
 SOLVENT CDCl3  
 NS 16  
 DS 2  
 SWH 6188.119 Hz  
 FIDRES 0.094423 Hz  
 AQ 5.2953086 sec  
 RG 322  
 DW 80.800 usec  
 DE 6.50 usec  
 TE 300.0 K  
 D1 1.00000000 sec  
 TD0 1

==== CHANNEL f1 ====  
 NUC1 1H  
 P1 13.95 usec  
 PL1 -1.00 dB  
 PL1W 15.02081871 W  
 SFO1 300.2598542 MHz

F2 - Processing parameters  
 SI 32768  
 SF 300.2580257 MHz  
 WDW EM  
 SSB 0  
 LB 0.30 Hz  
 GB 0  
 PC 1.00

S73: <sup>1</sup>H NMR spectrum of 3v (expansion)

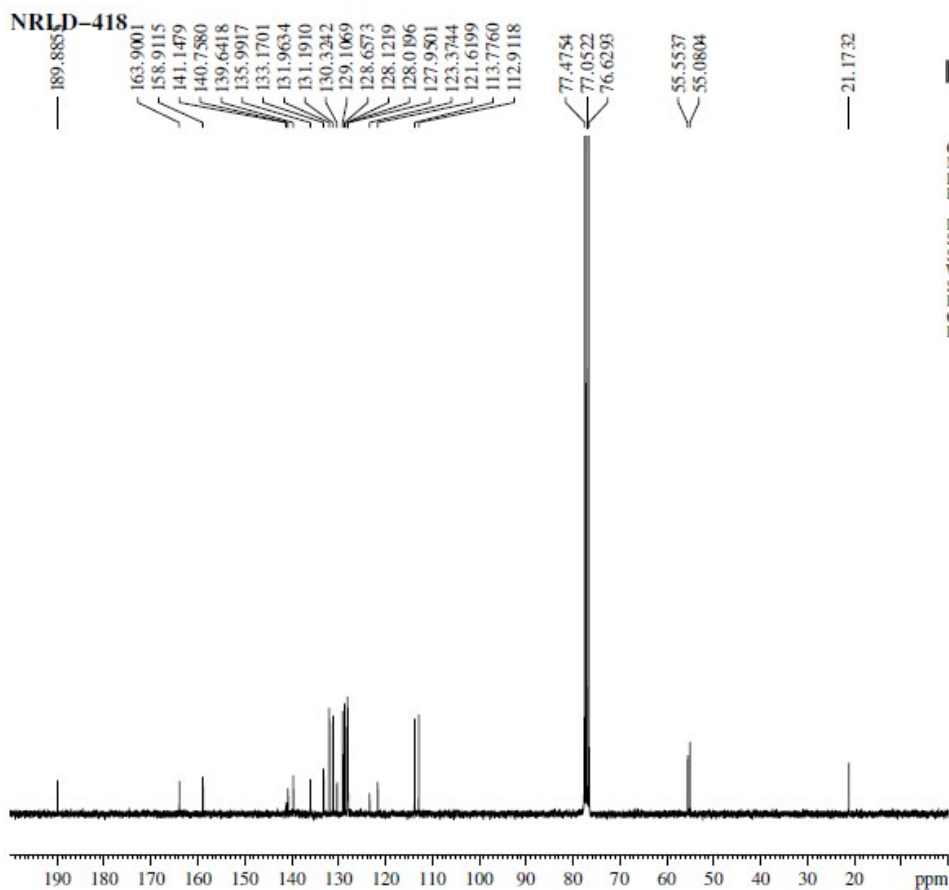

**S74:**  $^{13}\text{C}$  NMR spectrum of **3v**

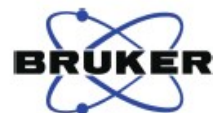

Current Data Parameters  
NAME 12-FEB-AN-2020  
EXPNO 350  
PROCNO 1

F2 - Processing parameters  
SI 32768  
SF 75.4999320 MHz  
WDW EM  
SSB 0  
LB 1.00 Hz  
GB 0  
PC 1.40

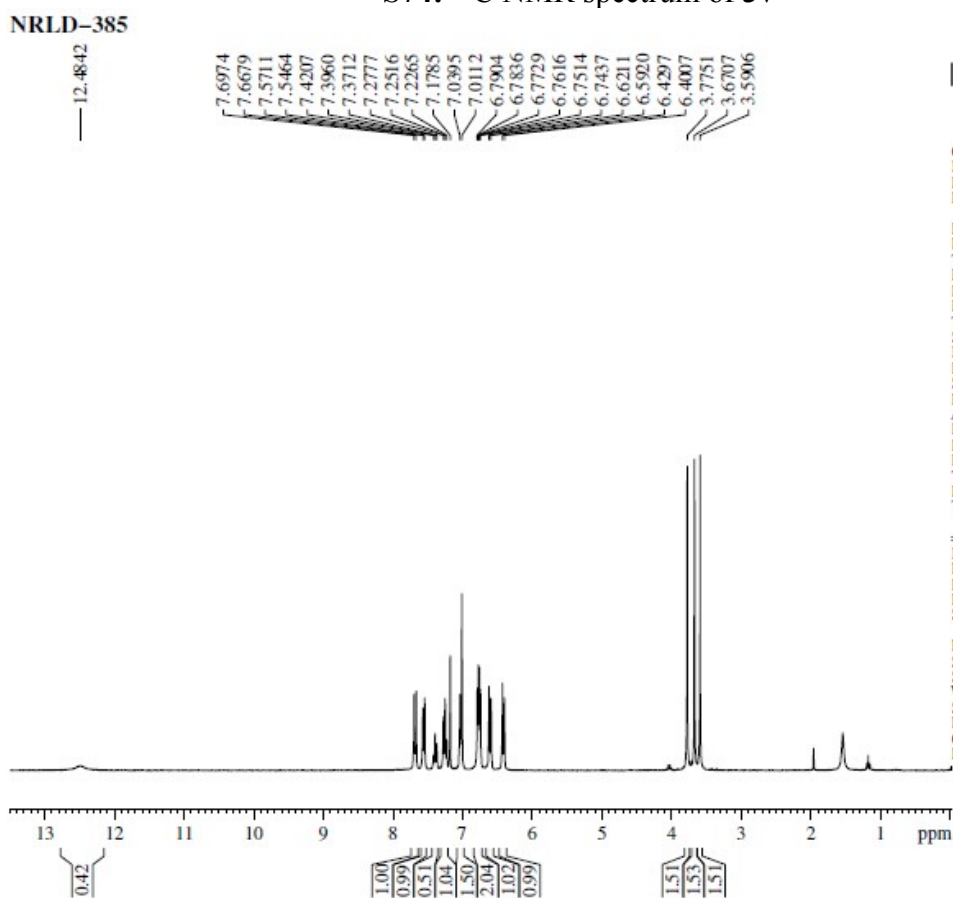

**S75:**  $^1\text{H}$  NMR spectrum of **3w**

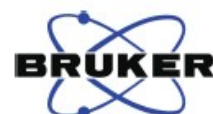

Current Data Parameters  
NAME 17-JAN-FN-2020  
EXPNO 550  
PROCNO 1

F2 - Acquisition Parameters  
Date\_ 20200117  
Time 11.16  
INSTRUM spect  
PROBHD 5 mm QNP 1H/13  
PULPROG zg30  
TD 65536  
SOLVENT CDCl3  
NS 16  
DS 2  
SWH 6188.119 Hz  
FIDRES 0.094423 Hz  
AQ 5.2953086 sec  
RG 287  
DW 80.800 usec  
DE 6.50 usec  
TE 300.0 K  
D1 1.0000000 sec  
TD0 1

==== CHANNEL f1 ====  
NUC1 1H  
P1 13.95 usec  
PL1 -1.00 dB  
PL1W 15.02081871 W  
SFO1 300.2598542 MHz

F2 - Processing parameters  
SI 32768  
SF 300.2580318 MHz  
WDW EM  
SSB 0  
LB 0.30 Hz  
GB 0  
PC 1.00

NRLD-385

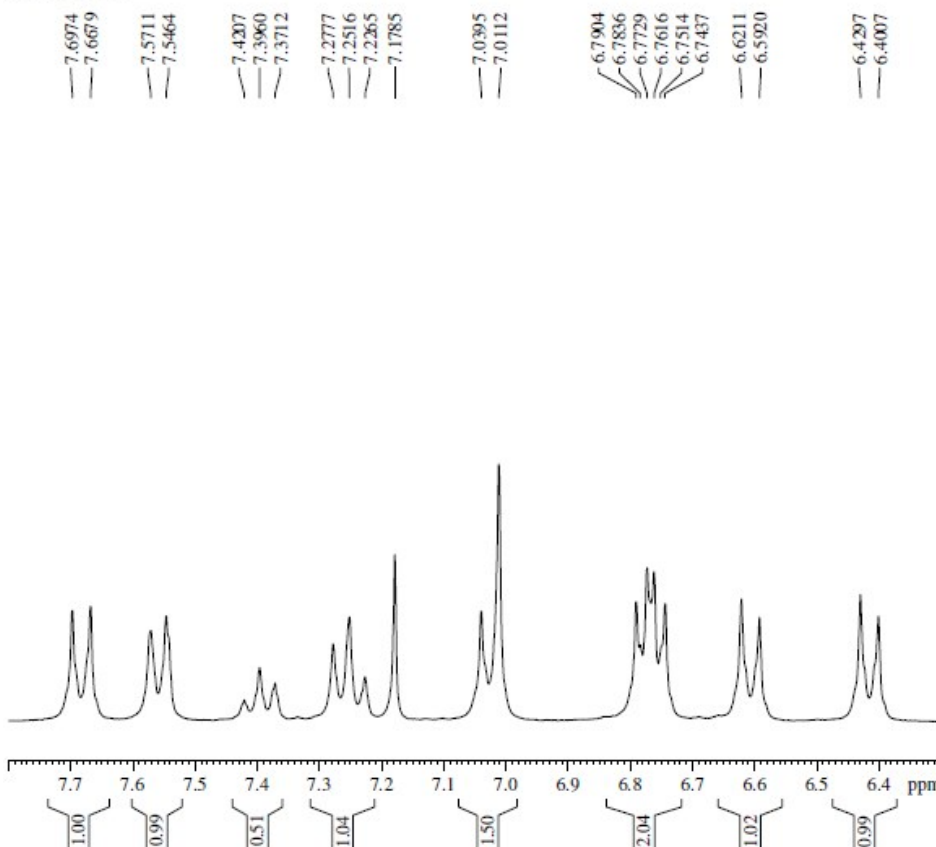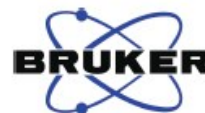

Current Data Parameters  
 NAME 17-JAN-FN-2020  
 EXPNO 550  
 PROCNO 1

F2 - Acquisition Parameters  
 Date\_ 20200117  
 Time 11.16  
 INSTRUM spect  
 PROBHD 5 mm QNP 1H/13  
 PULPROG zg30  
 TD 65536  
 SOLVENT CDCl3  
 NS 16  
 DS 2  
 SWH 6188.119 Hz  
 FIDRES 0.094423 Hz  
 AQ 5.2953086 sec  
 RG 287  
 DW 80.800 usec  
 DE 6.50 usec  
 TE 300.0 K  
 D1 1.0000000 sec  
 TD0 1

==== CHANNEL f1 ====  
 NUC1 1H  
 P1 13.95 usec  
 PL1 -1.00 dB  
 PL1W 15.02081871 W  
 SFO1 300.2598542 MHz

F2 - Processing parameters  
 SI 32768  
 SF 300.2580318 MHz  
 WDW EM  
 SSB 0  
 LB 0.30 Hz  
 GB 0  
 PC 1.00

S76: <sup>1</sup>H NMR spectrum of 3w (expansion)

NRLD-385

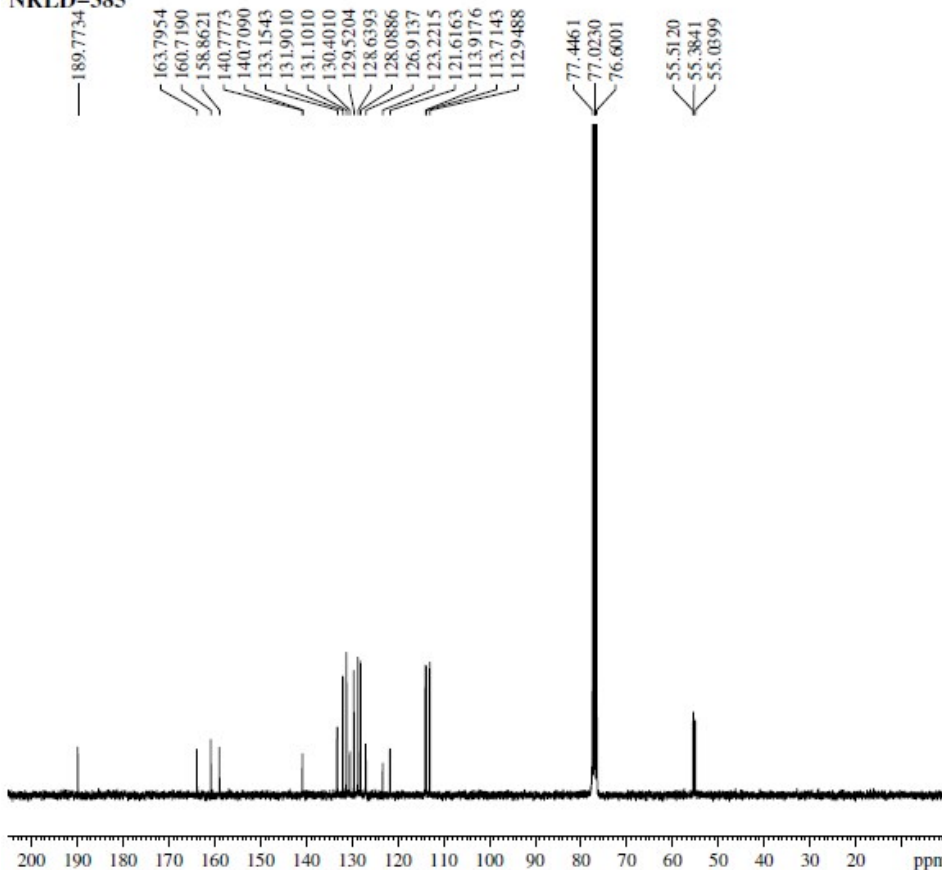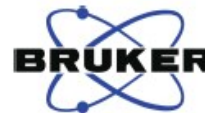

Current Data Parameters  
 NAME 17-Jan-AN-2020  
 EXPNO 340  
 PROCNO 1

F2 - Processing parameters  
 SI 32768  
 SF 75.4999341 MHz  
 WDW EM  
 SSB 0  
 LB 1.00 Hz  
 GB 0  
 PC 1.40

S77: <sup>13</sup>C NMR spectrum of 3w

NRLD-365

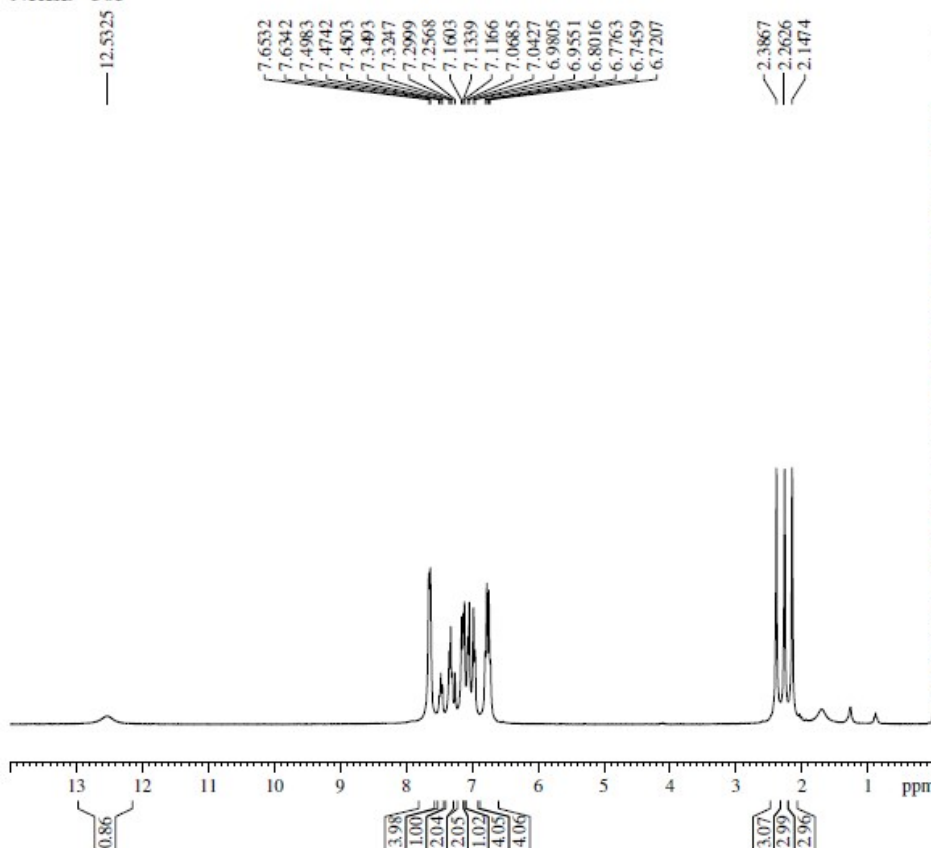

S78: <sup>1</sup>H NMR spectrum of 3x

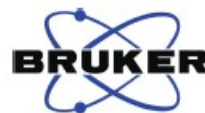

Current Data Parameters  
 NAME 13-Mar-FN-2020  
 EXPNO 410  
 PROCNO 1

F2 - Acquisition Parameters  
 Date\_ 20200313  
 Time 11.15  
 INSTRUM spect  
 PROBHD 5 mm QNP 1H/13  
 PULPROG zg30  
 TD 65536  
 SOLVENT CDCl3  
 NS 16  
 DS 2  
 SWH 6188.119 Hz  
 FIDRES 0.094423 Hz  
 AQ 5.2953086 sec  
 RG 181  
 DW 80.800 usec  
 DE 6.50 usec  
 TE 300.0 K  
 D1 1.00000000 sec  
 TD0 1

==== CHANNEL f1 ====  
 NUC1 1H  
 P1 13.95 usec  
 PL1 -1.00 dB  
 PL1W 15.02081871 W  
 SFO1 300.2598542 MHz

F2 - Processing parameters  
 SI 32768  
 SF 300.2580083 MHz  
 WDW EM  
 SSB 0  
 LB 0.30 Hz  
 GB 0  
 PC 1.00

NRLD-365

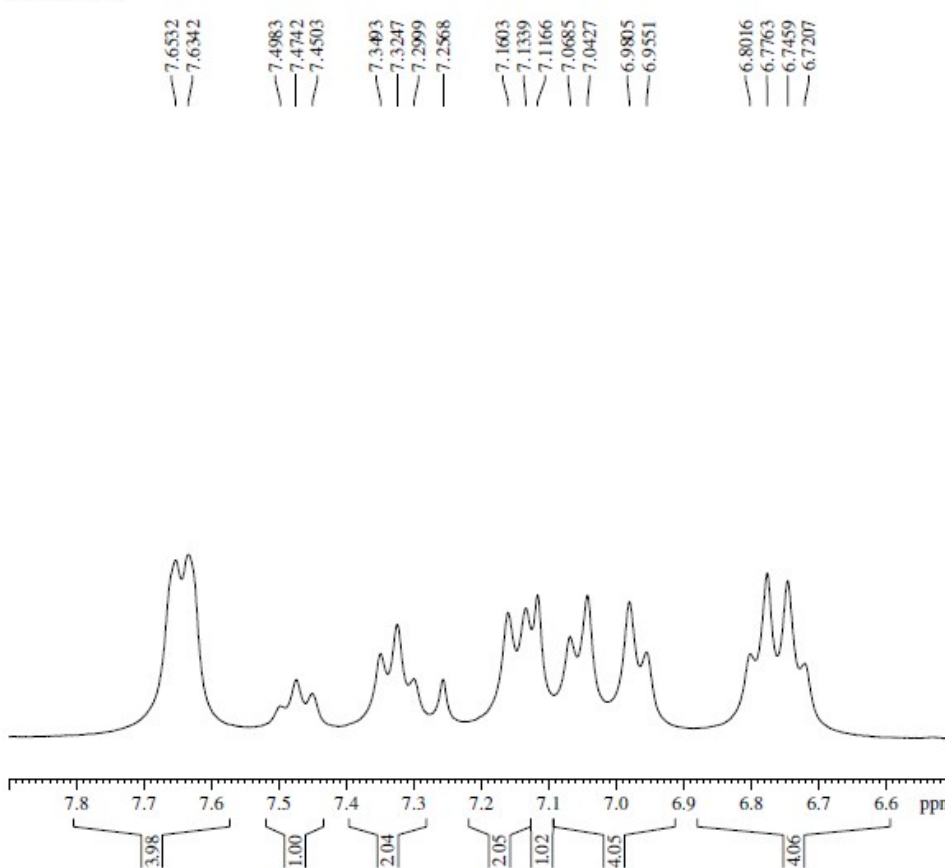

S79: <sup>1</sup>H NMR spectrum of 3x (expansion)

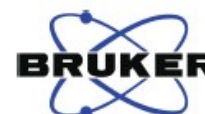

Current Data Parameters  
 NAME 13-Mar-FN-2020  
 EXPNO 410  
 PROCNO 1

F2 - Acquisition Parameters  
 Date\_ 20200313  
 Time 11.15  
 INSTRUM spect  
 PROBHD 5 mm QNP 1H/13  
 PULPROG zg30  
 TD 65536  
 SOLVENT CDCl3  
 NS 16  
 DS 2  
 SWH 6188.119 Hz  
 FIDRES 0.094423 Hz  
 AQ 5.2953086 sec  
 RG 181  
 DW 80.800 usec  
 DE 6.50 usec  
 TE 300.0 K  
 D1 1.00000000 sec  
 TD0 1

==== CHANNEL f1 ====  
 NUC1 1H  
 P1 13.95 usec  
 PL1 -1.00 dB  
 PL1W 15.02081871 W  
 SFO1 300.2598542 MHz

F2 - Processing parameters  
 SI 32768  
 SF 300.2580083 MHz  
 WDW EM  
 SSB 0  
 LB 0.30 Hz  
 GB 0  
 PC 1.00



NRLD-365

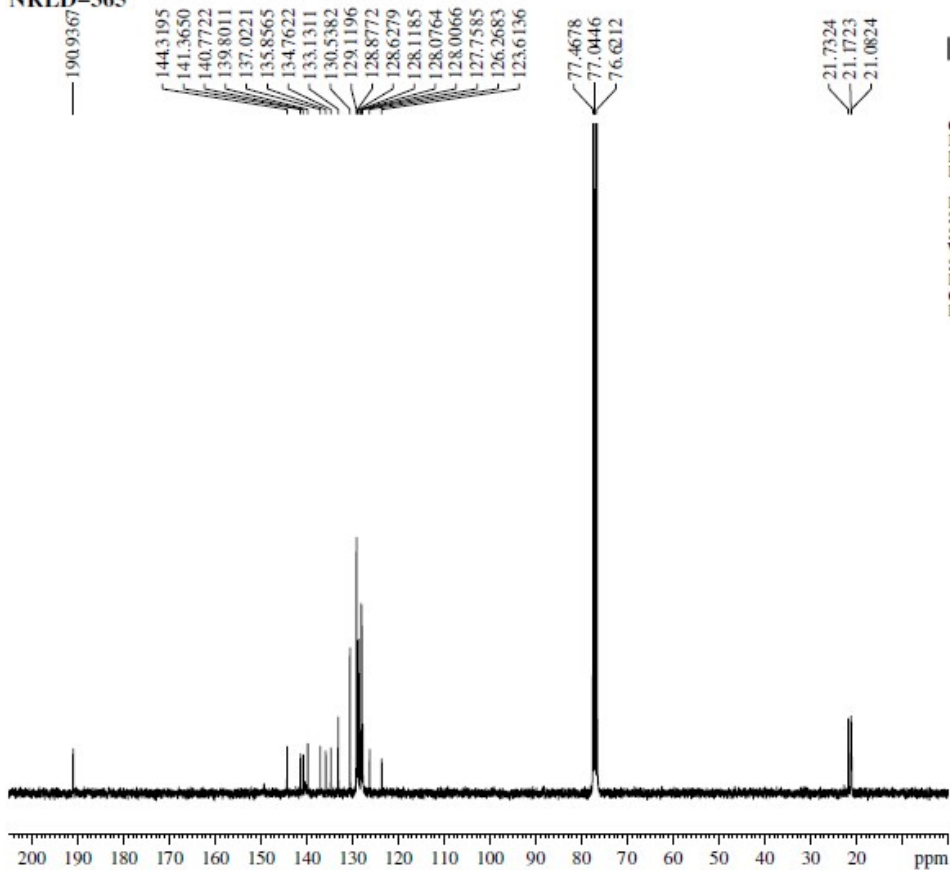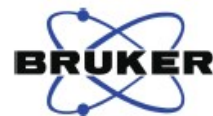

Current Data Parameters  
 NAME 13-Mar-FN-2020  
 EXPNO 420  
 PROCNO 1

F2 - Processing parameters  
 SI 32768  
 SF 75.4999338 MHz  
 WDW EM  
 SSB 0  
 LB 1.00 Hz  
 GB 0  
 PC 1.40

S80: <sup>13</sup>C NMR spectrum of 3x

NRLD-366

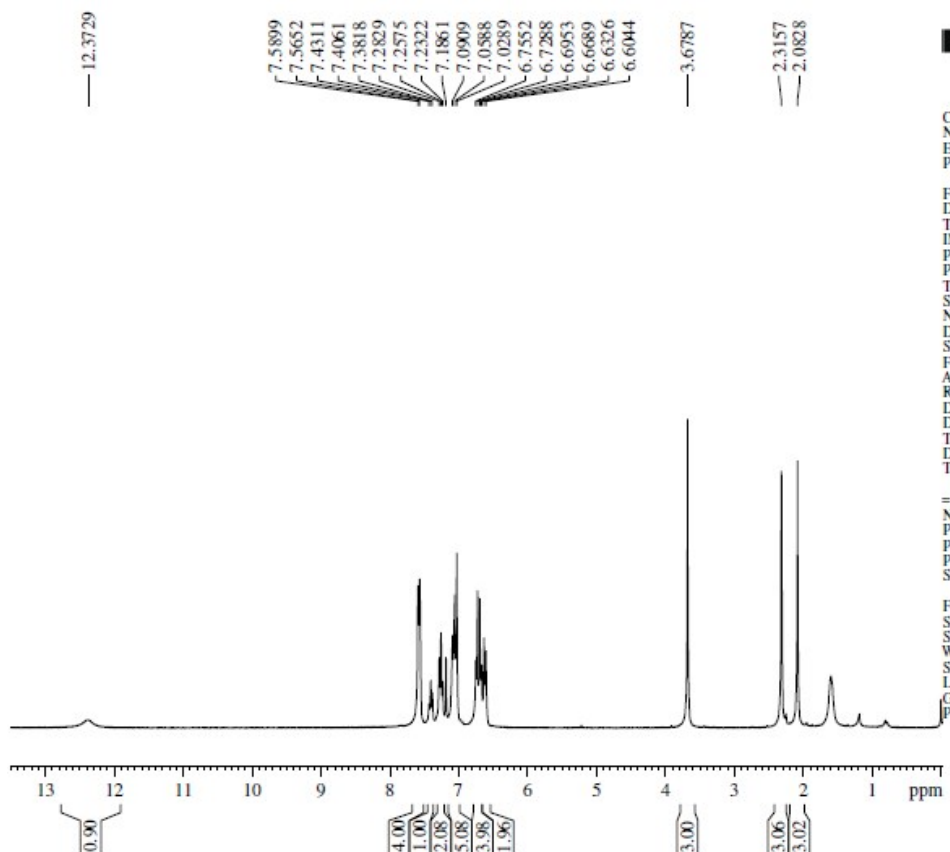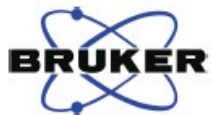

Current Data Parameters  
 NAME 27-Sept-FN-2019  
 EXPNO 490  
 PROCNO 1

F2 - Acquisition Parameters  
 Date\_ 20190927  
 Time 11.34  
 INSTRUM spect  
 PROBHD 5 mm QNP 1H/13  
 PULPROG zg30  
 TD 65536  
 SOLVENT CDCl3  
 NS 16  
 DS 2  
 SWH 6188.119 Hz  
 FIDRES 0.094423 Hz  
 AQ 5.2953086 sec  
 RG 256  
 DW 80.800 usec  
 DE 6.50 usec  
 TE 300.0 K  
 D1 1.00000000 sec  
 TD0 1

==== CHANNEL f1 ====  
 NUC1 1H  
 P1 13.95 usec  
 PL1 -1.00 dB  
 PL1W 15.02081871 W  
 SFO1 300.2598542 MHz

F2 - Processing parameters  
 SI 32768  
 SF 300.2580296 MHz  
 WDW EM  
 SSB 0  
 LB 0.30 Hz  
 GB 0  
 PC 1.00

S81: <sup>1</sup>H NMR spectrum of 3y



NRLD-366

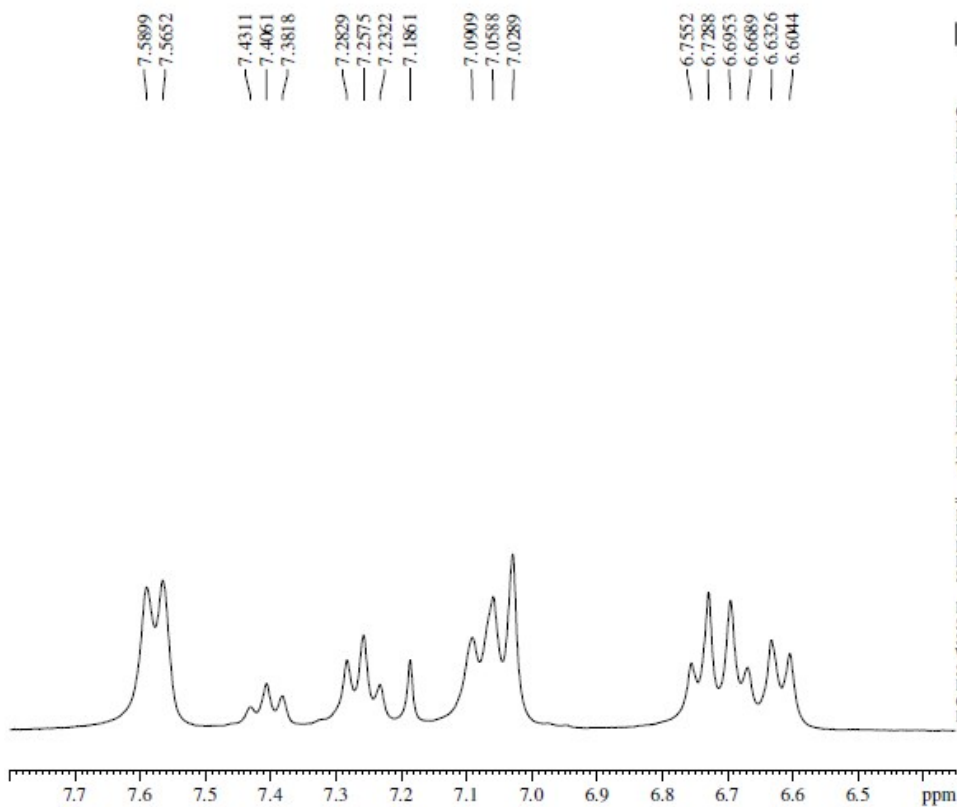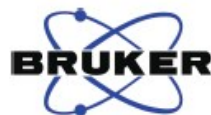

Current Data Parameters  
NAME 27-Sept-FN-2019  
EXPNO 490  
PROCNO 1

F2 - Acquisition Parameters  
Date\_ 20190927  
Time 11.34  
INSTRUM spect  
PROBHD 5 mm QNP 1H/13  
PULPROG zg30  
TD 65536  
SOLVENT CDCl3  
NS 16  
DS 2  
SWH 6188.119 Hz  
FIDRES 0.094423 Hz  
AQ 5.2953086 sec  
RG 256  
DW 80.800 usec  
DE 6.50 usec  
TE 300.0 K  
D1 1.00000000 sec  
TD0 1

==== CHANNEL f1 ====  
NUC1 1H  
P1 13.95 usec  
PL1 -1.00 dB  
PL1W 15.02081871 W  
SFO1 300.2598542 MHz

F2 - Processing parameters  
SI 32768  
SF 300.2580296 MHz  
WDW EM  
SSB 0  
LB 0.30 Hz  
GB 0  
PC 1.00

S82: <sup>1</sup>H NMR spectrum of 3y (expansion)

NRLD-366

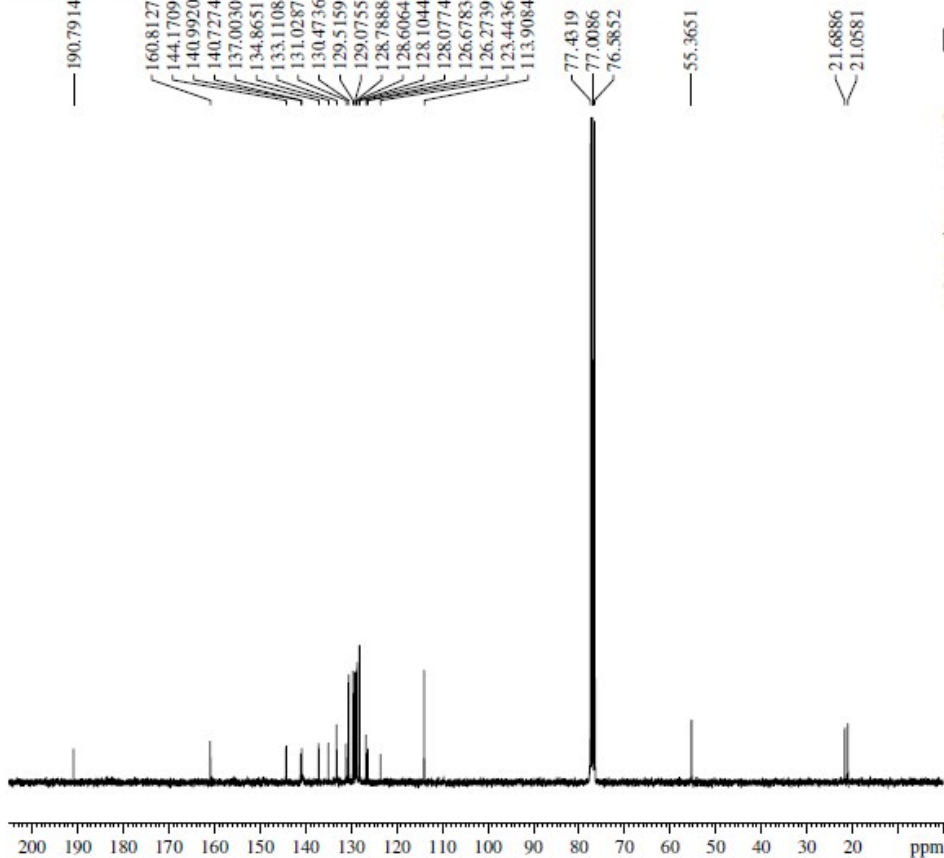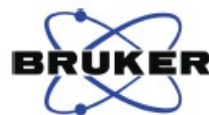

Current Data Parameters  
NAME 30-Sept-FN-2019  
EXPNO 460  
PROCNO 1

F2 - Processing parameters  
SI 32768  
SF 75.4999361 MHz  
WDW EM  
SSB 0  
LB 1.00 Hz  
GB 0  
PC 1.40

S83: <sup>13</sup>C NMR spectrum of 3y

NRLD-369

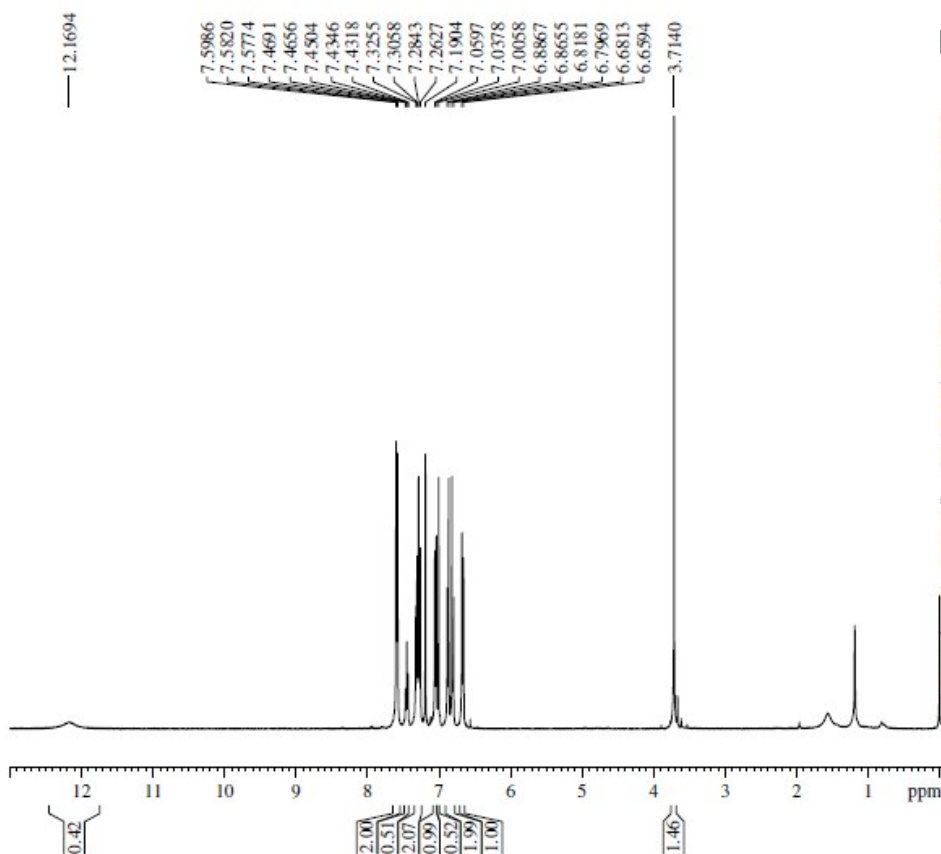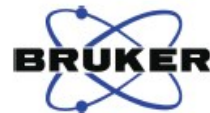

Current Data Parameters  
 NAME 24-Dec-AN-2019  
 EXPNO 340  
 PROCNO 1

F2 - Acquisition Parameters  
 Date\_ 20191224  
 Time 22.13  
 INSTRUM spect  
 PROBHD 5 mm PABBO BB/  
 PULPROG zg30  
 TD 65536  
 SOLVENT CDCl3  
 NS 8  
 DS 0  
 SWH 9615.385 Hz  
 FIDRES 0.146719 Hz  
 AQ 3.4078720 sec  
 RG 145.29  
 DW 52.000 usec  
 DE 6.50 usec  
 TE 303.0 K  
 D1 1.00000000 sec  
 TD0 1

==== CHANNEL f1 ====  
 SFO1 400.1629712 MHz  
 NUC1 1H  
 P1 13.20 usec  
 PLW1 13.00000000 W

F2 - Processing parameters  
 SI 65536  
 SF 400.1605373 MHz  
 WDW EM  
 SSB 0  
 LB 0.30 Hz  
 GB 0  
 PC 1.00

S84: <sup>1</sup>H NMR spectrum of 3z

NRLD-369

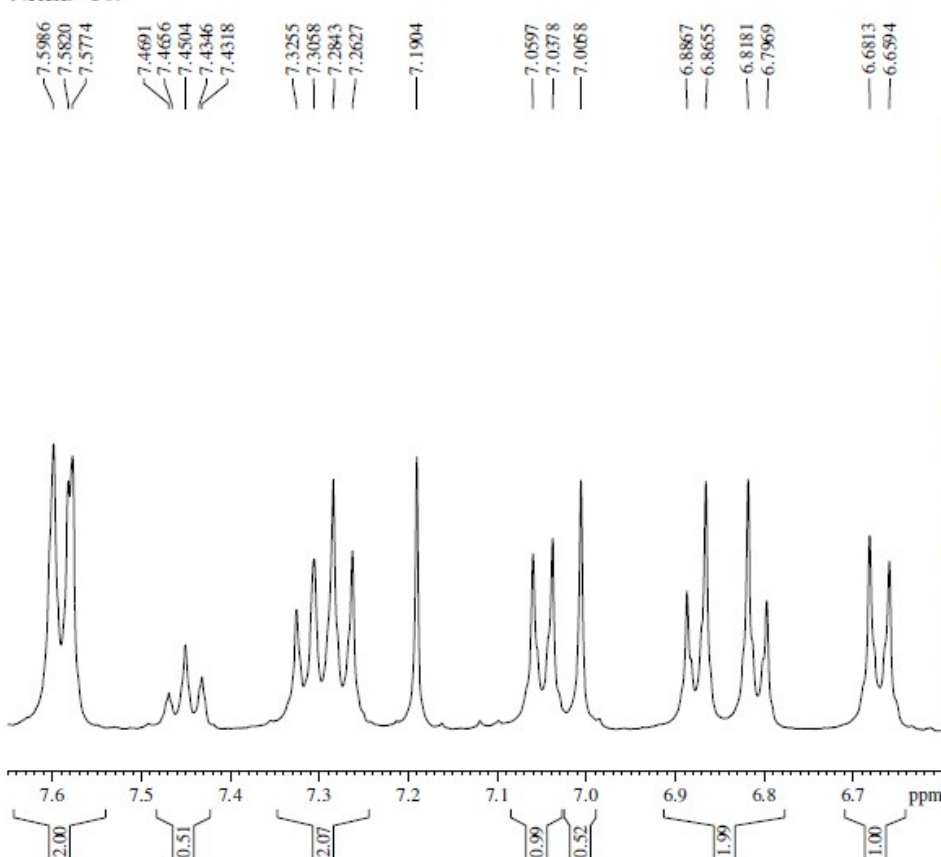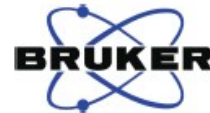

Current Data Parameters  
 NAME 24-Dec-AN-2019  
 EXPNO 340  
 PROCNO 1

F2 - Acquisition Parameters  
 Date\_ 20191224  
 Time 22.13  
 INSTRUM spect  
 PROBHD 5 mm PABBO BB/  
 PULPROG zg30  
 TD 65536  
 SOLVENT CDCl3  
 NS 8  
 DS 0  
 SWH 9615.385 Hz  
 FIDRES 0.146719 Hz  
 AQ 3.4078720 sec  
 RG 145.29  
 DW 52.000 usec  
 DE 6.50 usec  
 TE 303.0 K  
 D1 1.00000000 sec  
 TD0 1

==== CHANNEL f1 ====  
 SFO1 400.1629712 MHz  
 NUC1 1H  
 P1 13.20 usec  
 PLW1 13.00000000 W

F2 - Processing parameters  
 SI 65536  
 SF 400.1605373 MHz  
 WDW EM  
 SSB 0  
 LB 0.30 Hz  
 GB 0  
 PC 1.00

S85: <sup>1</sup>H NMR spectrum of 3z (expansion)

NRLD-369

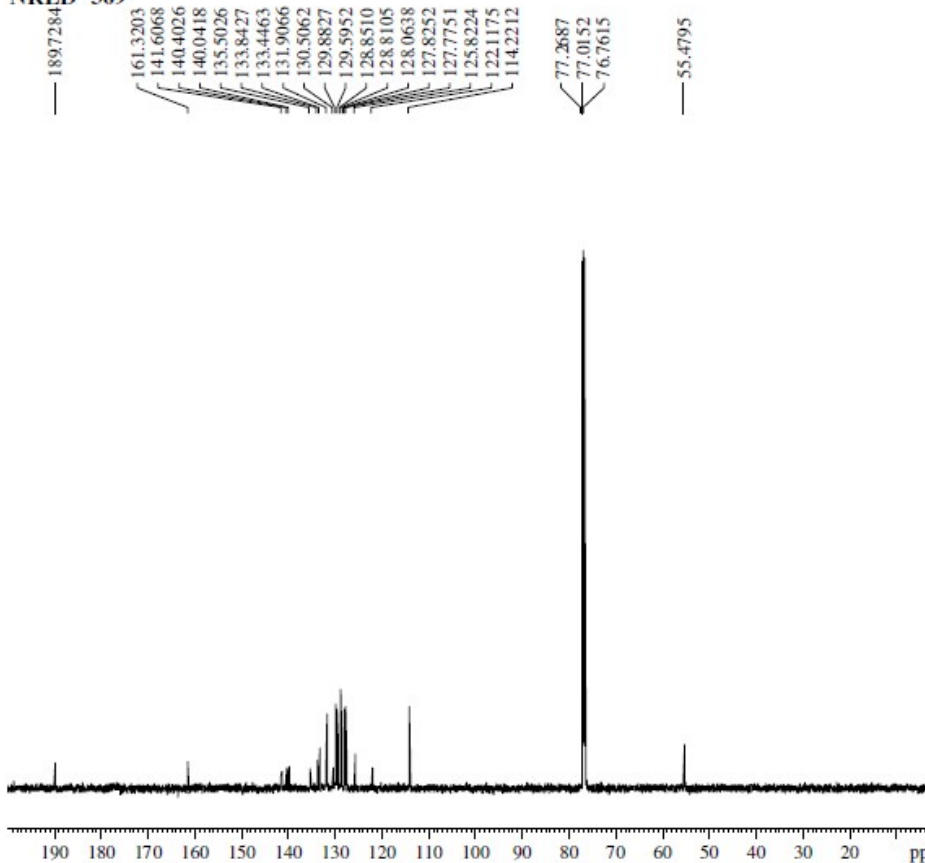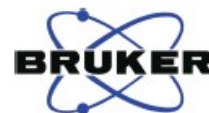

Current Data Parameters  
 NAME 14-NOV-FN-2019  
 EXPNO 590  
 PROCNO 1

F2 - Acquisition Parameters  
 Date\_ 20191114  
 Time 11.03  
 INSTRUM spect  
 PROBHID 5 mm PATXI 1H  
 PULPROG zgpg30  
 TD 65536  
 SOLVENT CDCl3  
 NS 4096  
 DS 0  
 SWH 29761.904 Hz  
 FIDRES 0.454131 Hz  
 AQ 1.1010048 sec  
 RG 87.95  
 DW 16.800 usec  
 DE 6.50 usec  
 TE 303.0 K  
 D1 2.00000000 sec  
 D11 0.03000000 sec  
 TD0 1

==== CHANNEL f1 ====  
 SFO1 125.9077573 MHz  
 NUC1 13C  
 P1 9.23 usec  
 PLW1 244.0000000 W

==== CHANNEL f2 ====  
 SFO2 500.6783527 MHz  
 NUC2 1H  
 CPDPRG2 waltz16  
 PCPD2 80.00 usec  
 PLW2 13.60000038 W  
 PLW12 0.08840500 W  
 PLW13 0.05657900 W

F2 - Processing parameters  
 SI 32768  
 SF 125.8951680 MHz  
 WDW EM  
 SSB 0  
 LB 3.00 Hz  
 GB 0  
 PC 1.40

S86: <sup>13</sup>C NMR spectrum of 3z

NRLD 395

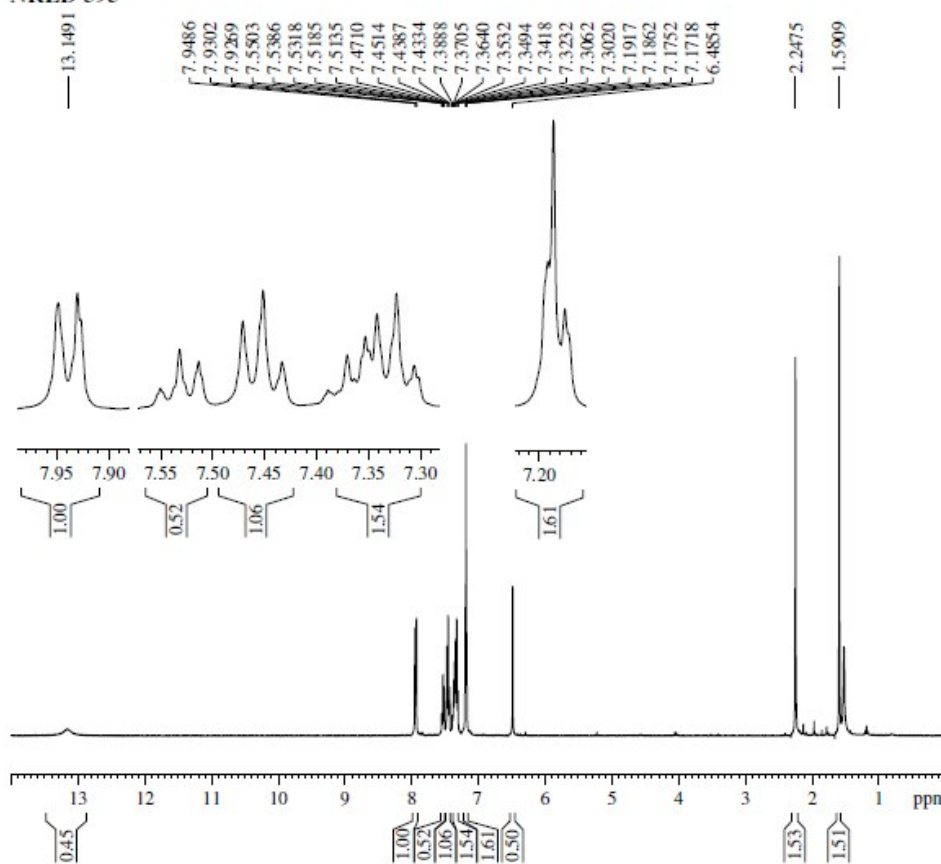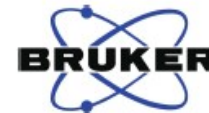

Current Data Parameters  
 NAME 08-Jan-FN-2020  
 EXPNO 530  
 PROCNO 1

F2 - Acquisition Parameters  
 Date\_ 20200108  
 Time 18.29  
 INSTRUM spect  
 PROBHID 5 mm PABBO BB/  
 PULPROG zg30  
 TD 65536  
 SOLVENT CDCl3  
 NS 8  
 DS 0  
 SWH 9615.385 Hz  
 FIDRES 0.146719 Hz  
 AQ 3.4078720 sec  
 RG 159.22  
 DW 52.000 usec  
 DE 6.50 usec  
 TE 297.3 K  
 D1 1.00000000 sec  
 TD0 1

==== CHANNEL f1 ====  
 SFO1 400.1629712 MHz  
 NUC1 1H  
 P1 13.20 usec  
 PLW1 13.00000000 W

F2 - Processing parameters  
 SI 65536  
 SF 400.1605391 MHz  
 WDW EM  
 SSB 0  
 LB 0.30 Hz  
 GB 0  
 PC 1.00

S87: <sup>1</sup>H NMR spectrum of 3za

NRLD 395

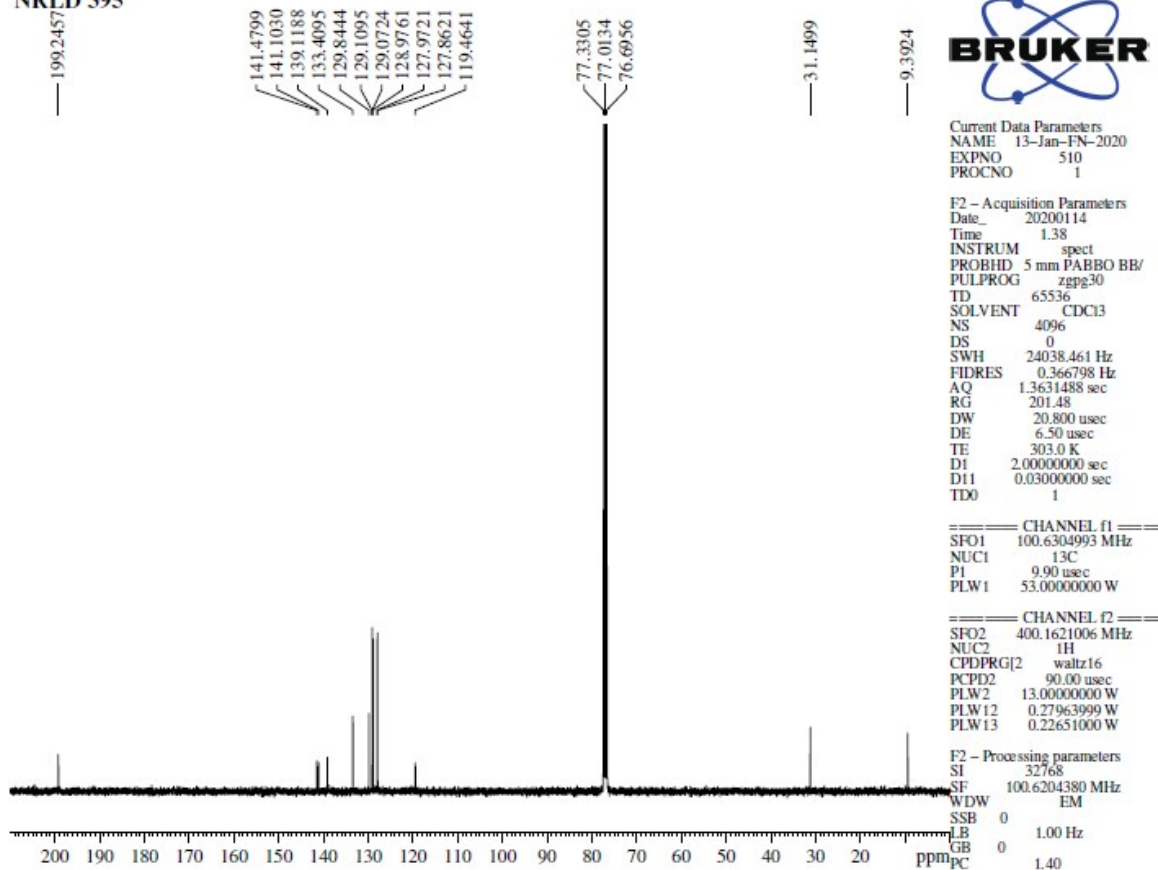

S88: <sup>13</sup>C NMR spectrum of 3za

NRLD-387-minor

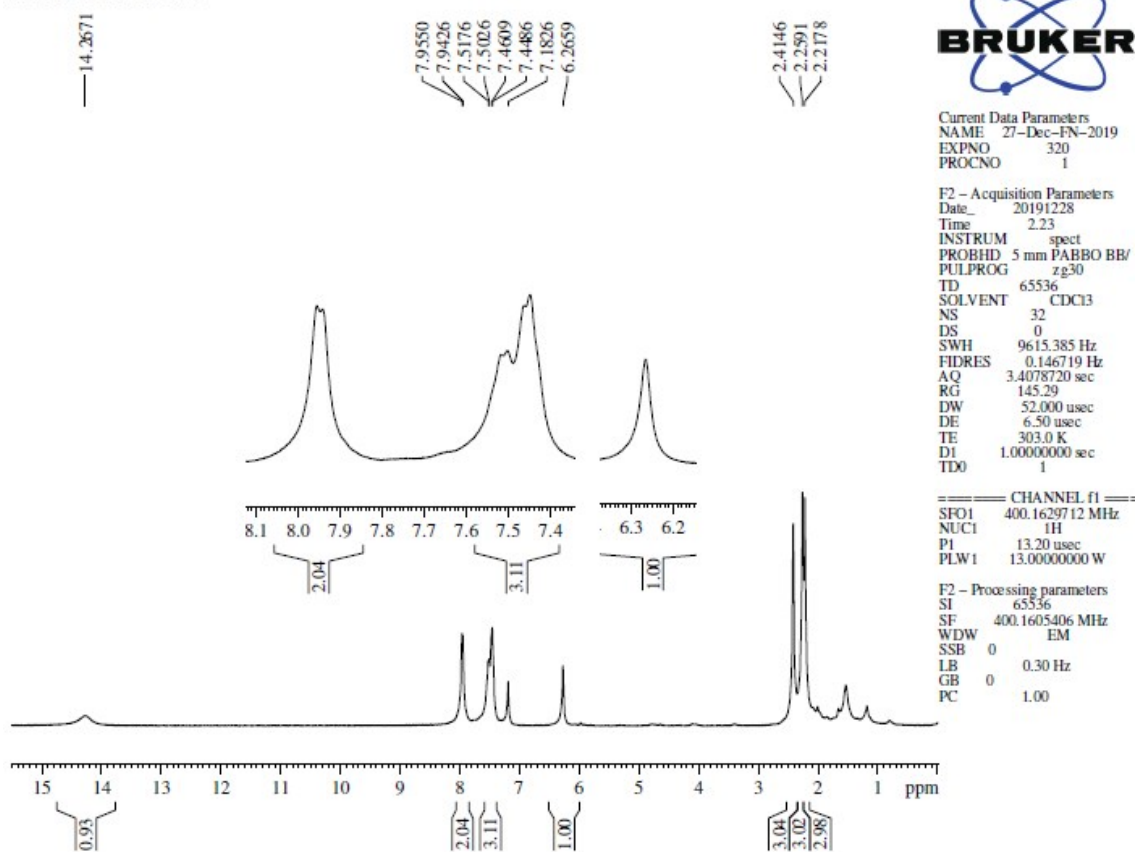

S89: <sup>1</sup>H NMR spectrum of 3zb (minor isomer)



NRLD-387-minor

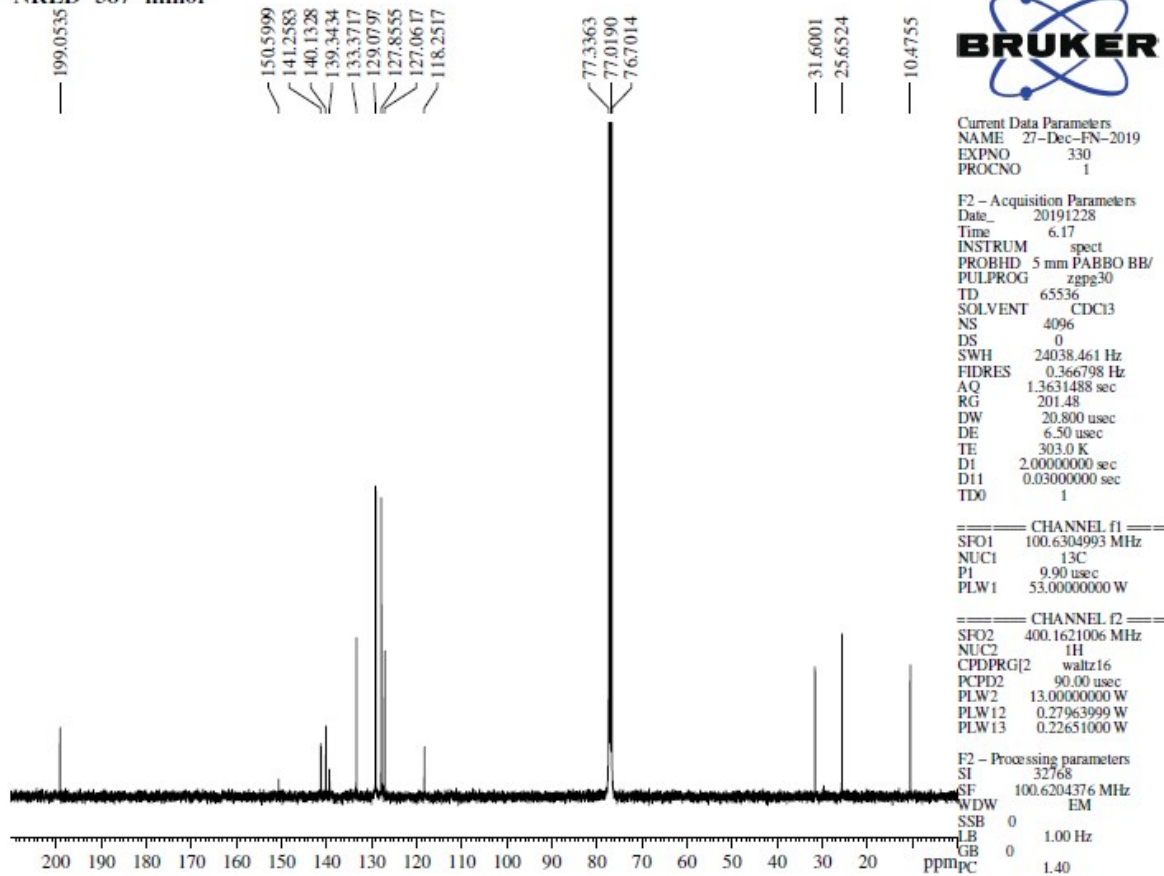

S90: <sup>13</sup>C NMR spectrum of 3zb (minor isomer)

NRLD-387-major

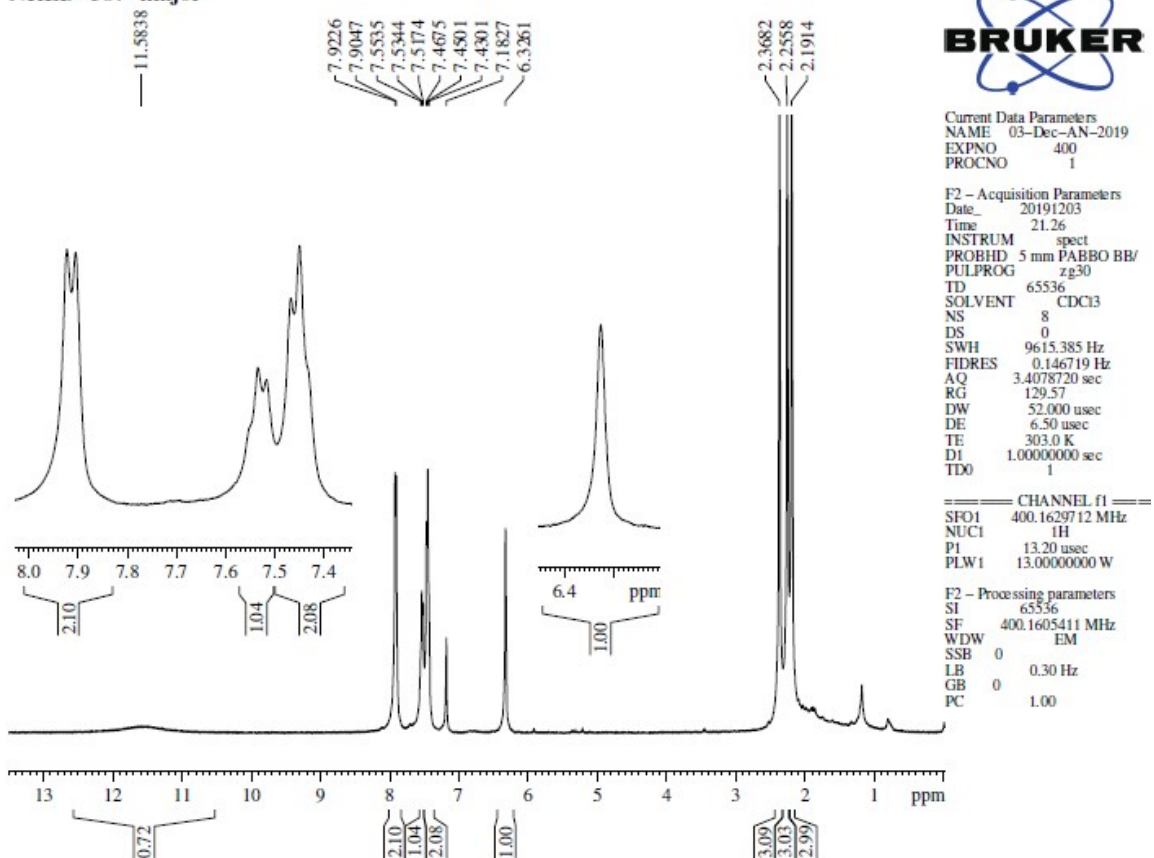

S91: <sup>1</sup>H NMR spectrum of 3zb (major isomer)

NRLD-387-major

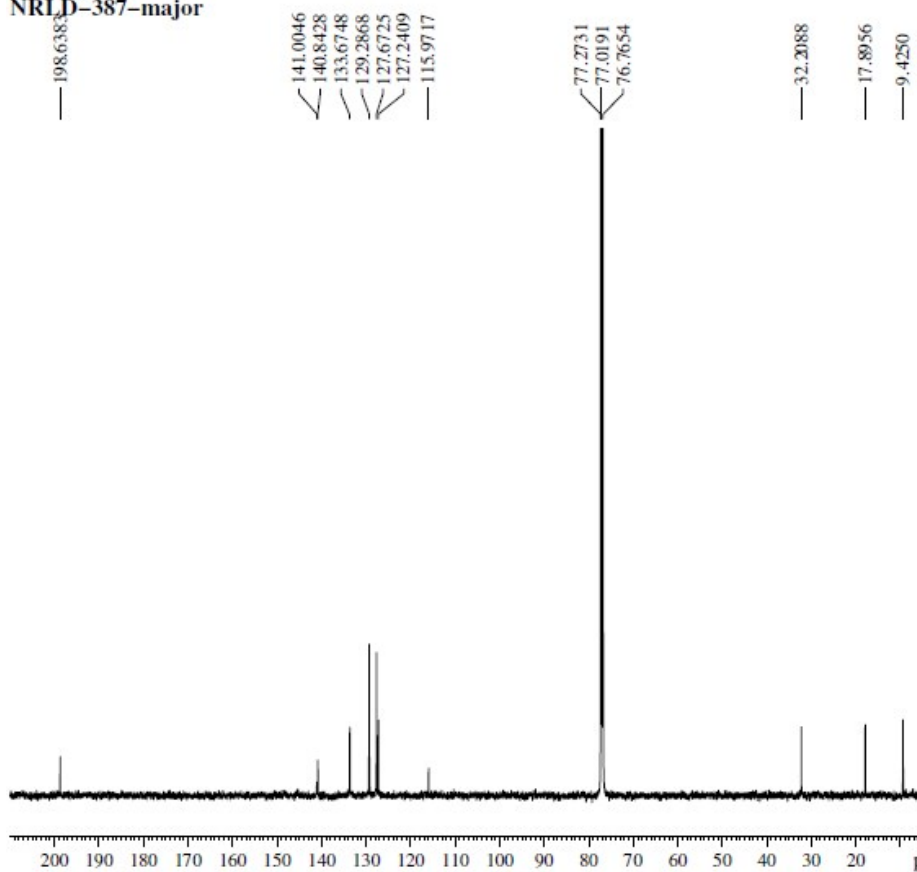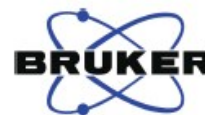

Current Data Parameters  
 NAME 04-Dec-FN-2019  
 EXPNO 350  
 PROCNO 1

F2 - Acquisition Parameters  
 Date\_ 20191204  
 Time 11.38  
 INSTRUM spect  
 PROBHD 5 mm PATXI 1H  
 PULPROG zgpg30  
 TD 65536  
 SOLVENT CDC13  
 NS 4096  
 DS 4  
 SWH 29761.904 Hz  
 FIDRES 0.454131 Hz  
 AQ 1.1010048 sec  
 RG 81.53  
 DW 16.800 usec  
 DE 6.50 usec  
 TE 303.0 K  
 D1 2.0000000 sec  
 D11 0.0300000 sec  
 TD0 1

==== CHANNEL f1 ====  
 SFO1 125.9077573 MHz  
 NUC1 13C  
 P1 9.23 usec  
 PLW1 244.0000000 W

==== CHANNEL f2 ====  
 SFO2 500.6783527 MHz  
 NUC2 1H  
 CPDPRG2 waltz16  
 PCPD2 80.00 usec  
 PLW2 13.6000038 W  
 PLW12 0.08840500 W  
 PLW13 0.05657900 W

F2 - Processing parameters  
 SI 32768  
 SF 125.8951680 MHz  
 WDW EM  
 SSB 0  
 LB 3.00 Hz  
 GB 0  
 PC 1.40

S92: 13C NMR spectrum of 3zb (major isomer)

NRLD-425

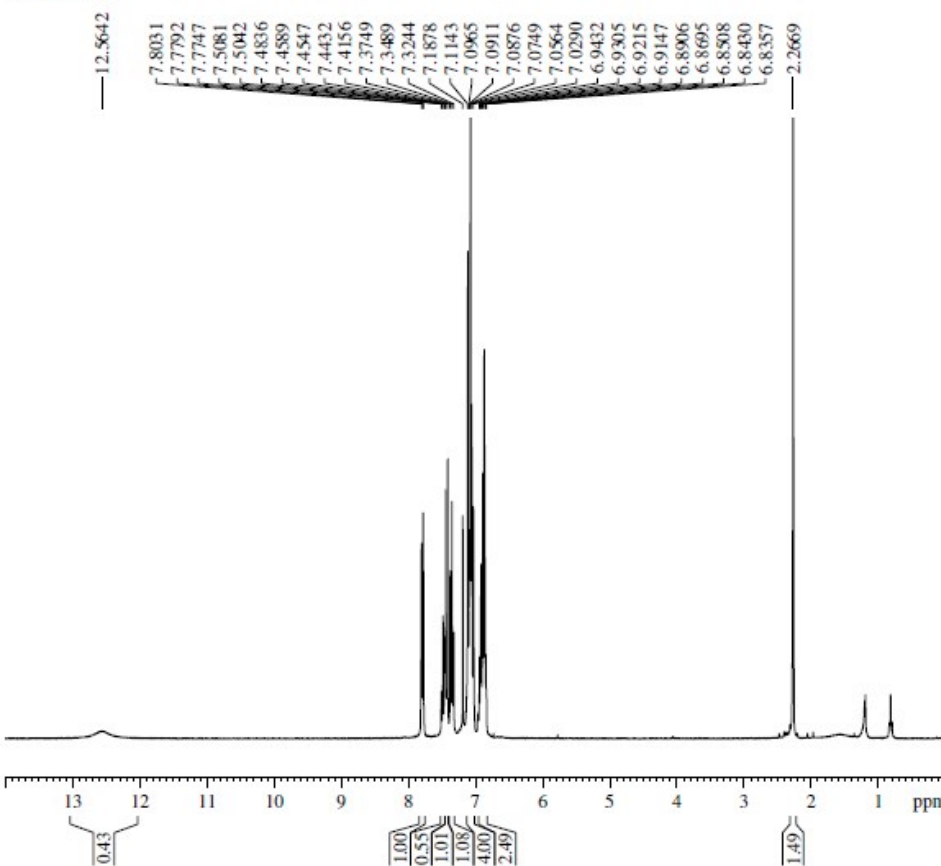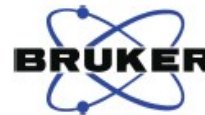

Current Data Parameters  
 NAME 26-Feb-AN-2020  
 EXPNO 560  
 PROCNO 1

F2 - Acquisition Parameters  
 Date\_ 20200226  
 Time 16.30  
 INSTRUM spect  
 PROBHD 5 mm QNP 1H/13  
 PULPROG zg30  
 TD 65536  
 SOLVENT CDC13  
 NS 16  
 DS 2  
 SWH 6188.119 Hz  
 FIDRES 0.094423 Hz  
 AQ 5.2953086 sec  
 RG 256  
 DW 80.800 usec  
 DE 6.50 usec  
 TE 300.0 K  
 D1 1.0000000 sec  
 TD0 1

==== CHANNEL f1 ====  
 NUC1 1H  
 P1 13.95 usec  
 PL1 -1.00 dB  
 PL1W 15.02081871 W  
 SFO1 300.2598542 MHz

F2 - Processing parameters  
 SI 32768  
 SF 300.2580291 MHz  
 WDW EM  
 SSB 0  
 LB 0.30 Hz  
 GB 0  
 PC 1.00

S93: 1H NMR spectrum of 3zc



NRLD-425

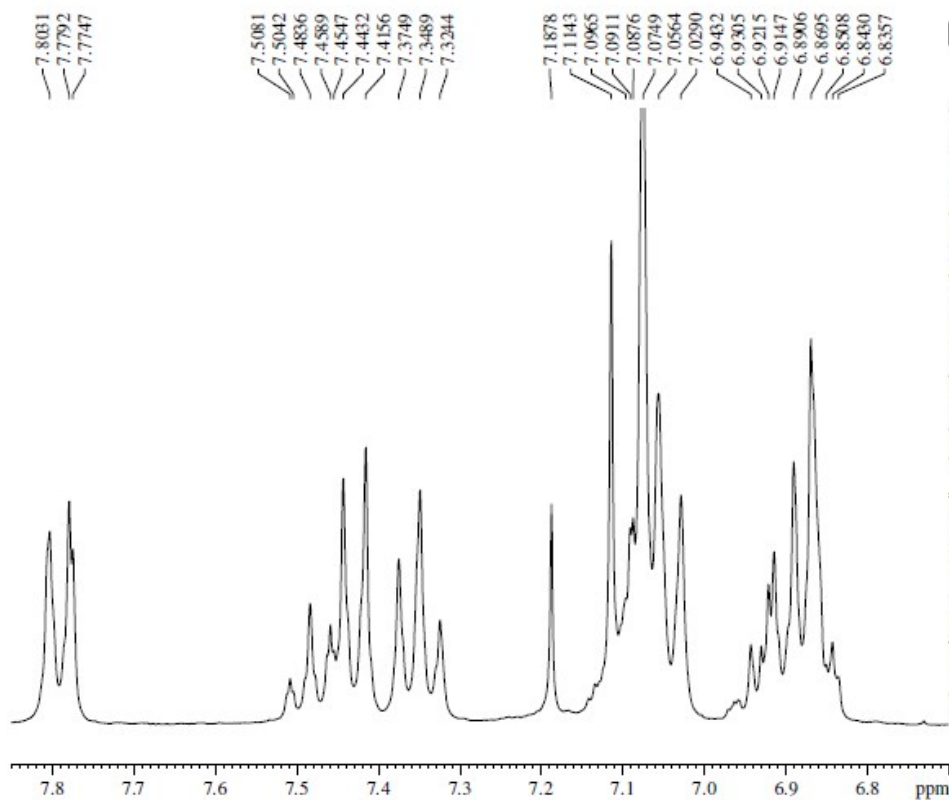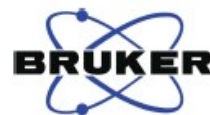

Current Data Parameters  
 NAME 26-Feb-AN-2020  
 EXPNO 560  
 PROCNO 1

F2 - Acquisition Parameters  
 Date\_ 20200226  
 Time 16.30  
 INSTRUM spect  
 PROBHD 5 mm QNP 1H/13  
 PULPROG zg30  
 TD 65536  
 SOLVENT CDCl3  
 NS 16  
 DS 2  
 SWH 6188.119 Hz  
 FIDRES 0.094423 Hz  
 AQ 5.2953086 sec  
 RG 256  
 DW 80.800 usec  
 DE 6.50 usec  
 TE 300.0 K  
 D1 1.00000000 sec  
 TDO 1

==== CHANNEL f1 ====  
 NUC1 1H  
 P1 13.95 usec  
 PL1 -1.00 dB  
 PL1W 15.02081871 W  
 SFO1 300.2598542 MHz

F2 - Processing parameters  
 SI 32768  
 SF 300.2580291 MHz  
 WDW EM  
 SSB 0  
 LB 0.30 Hz  
 GB 0  
 PC 1.00

S94: <sup>1</sup>H NMR spectrum of 3zc (expansion)

NRLD-425

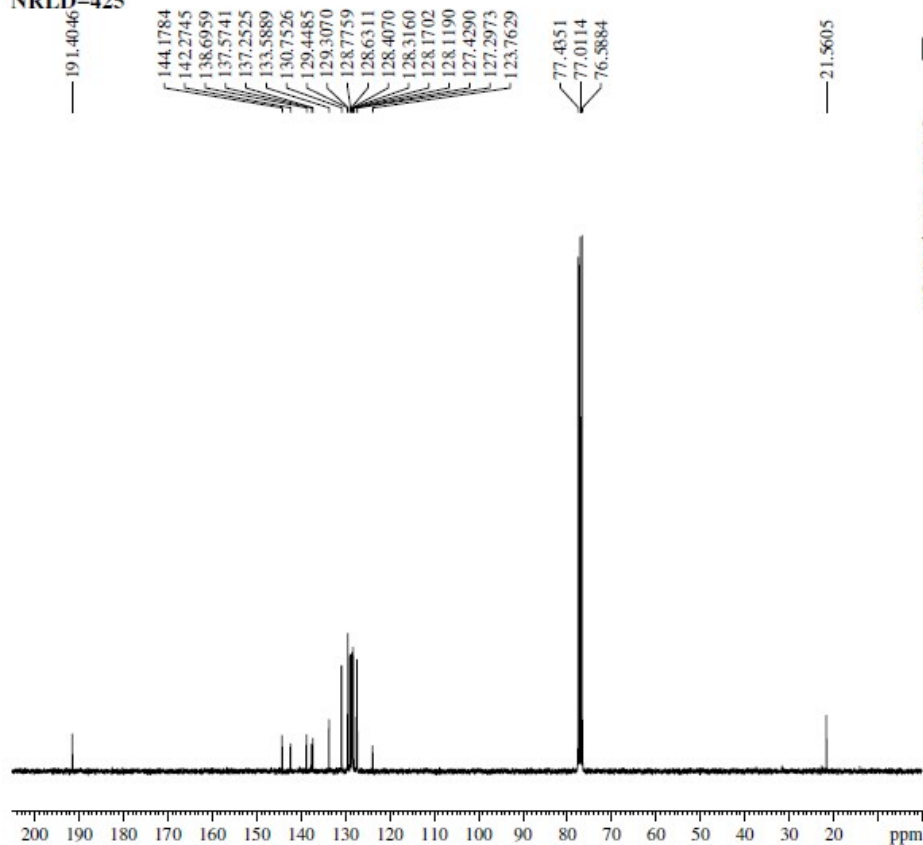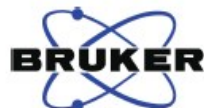

Current Data Parameters  
 NAME 27-FEB-FN-2020  
 EXPNO 370  
 PROCNO 1

F2 - Processing parameters  
 SI 32768  
 SF 75.4999357 MHz  
 WDW EM  
 SSB 0  
 LB 1.00 Hz  
 GB 0  
 PC 1.40

S95: <sup>13</sup>C NMR spectrum of 3zc

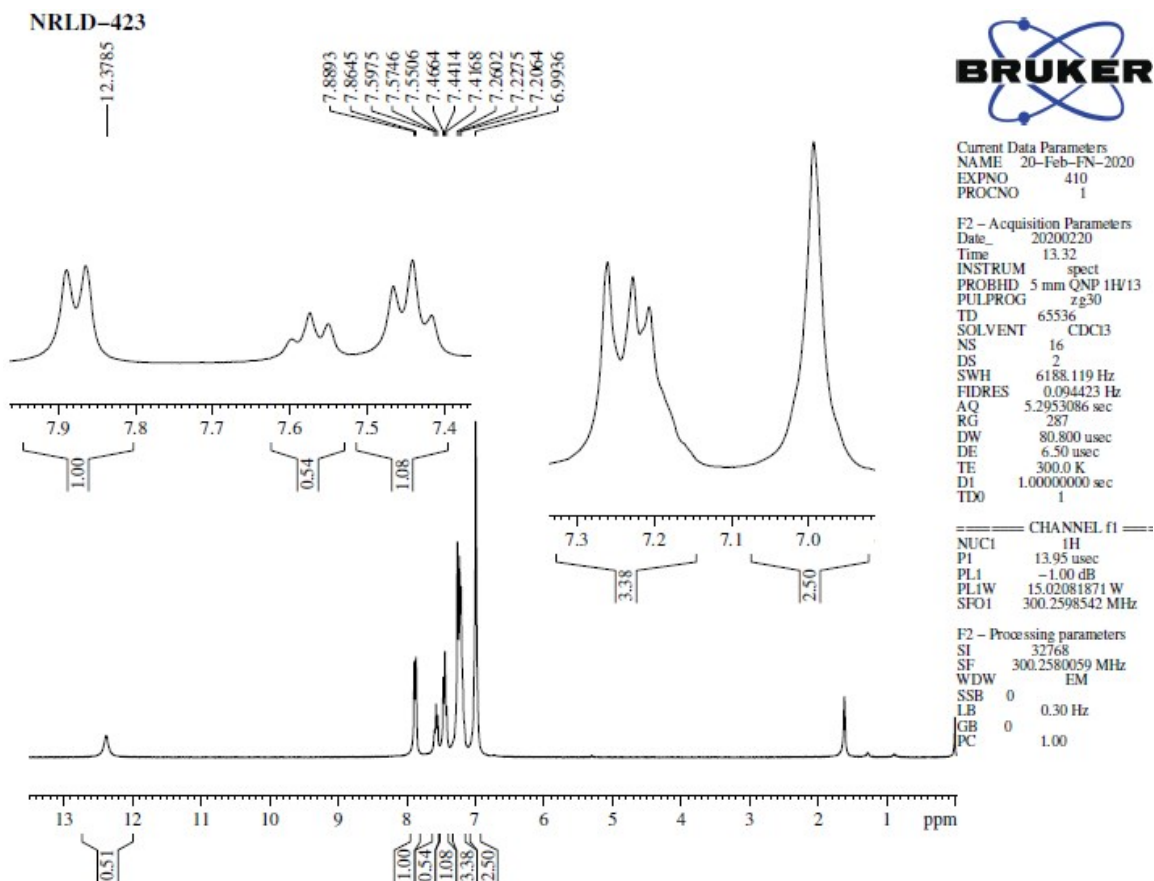

**S96: <sup>1</sup>H NMR spectrum of 3zd**

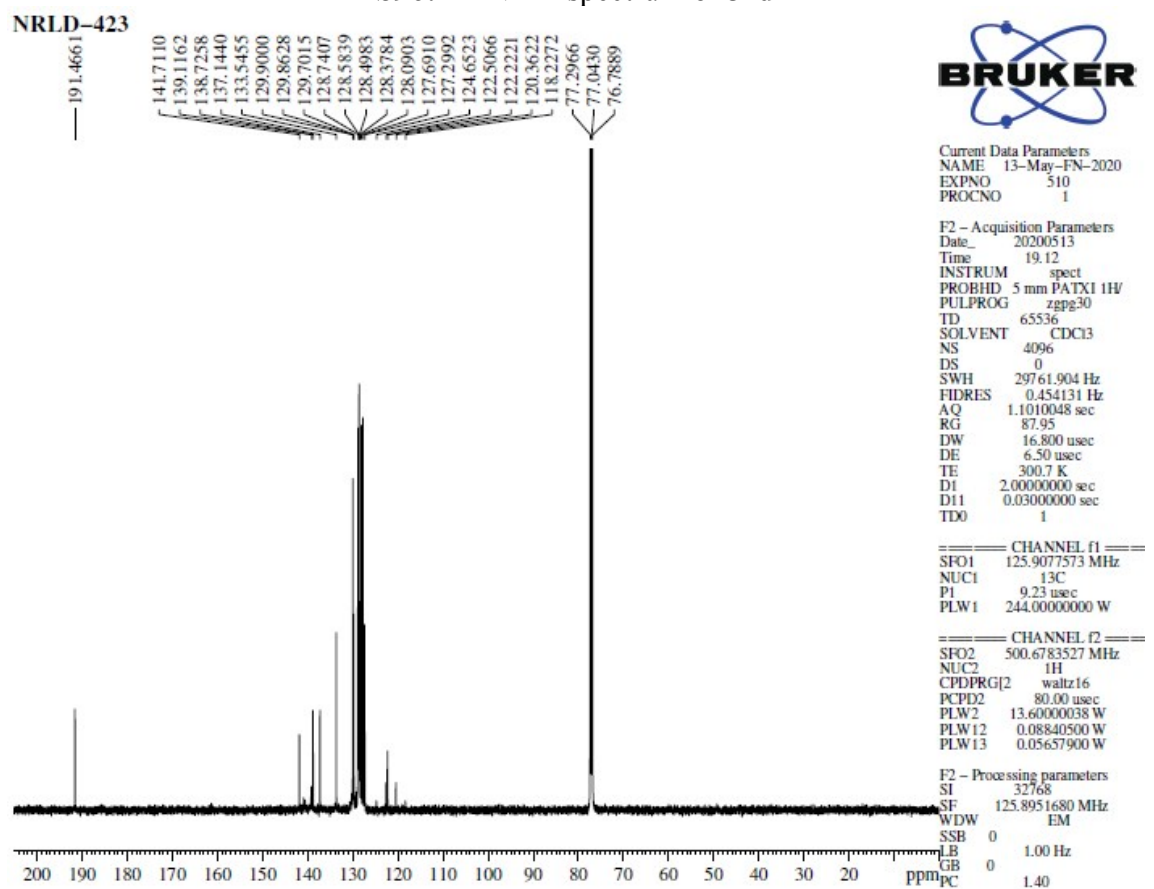

**S97: <sup>13</sup>C NMR spectrum of 3zd**

NRLD-423

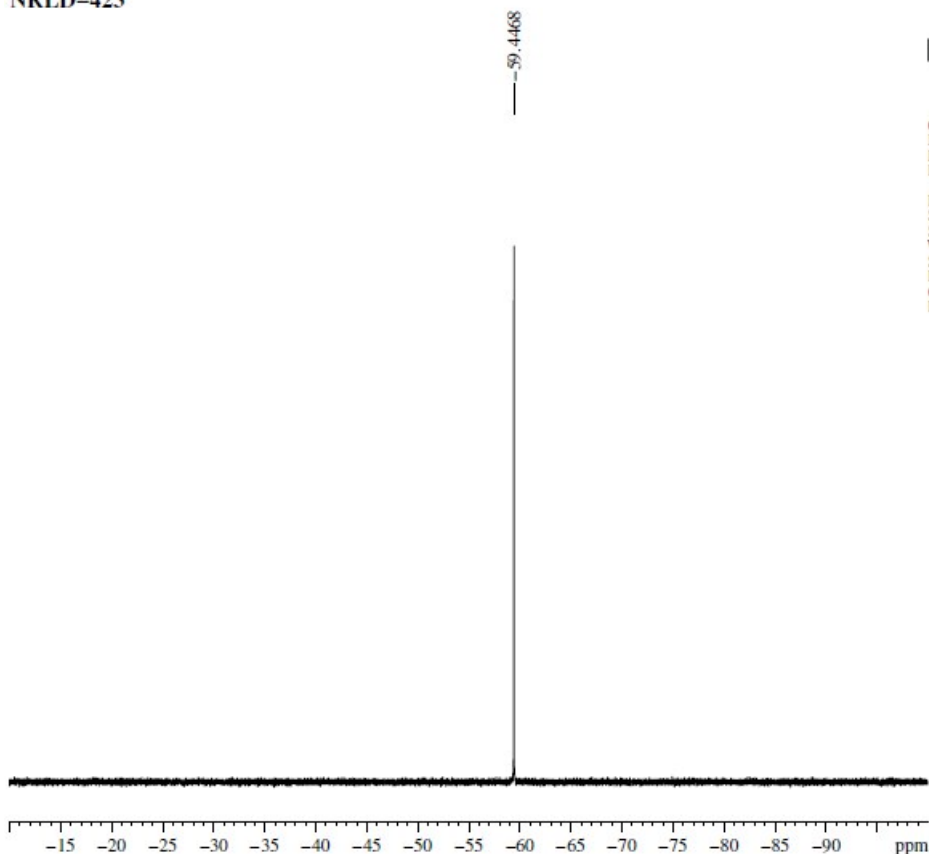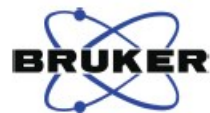

Current Data Parameters  
NAME 20-Feb-FN-2020  
EXPNO 420  
PROCNO 1

F2 - Processing parameters  
SI 65536  
SF 282.5247960 MHz  
WDW EM  
SSB 0  
LB 0.30 Hz  
GB 0  
PC 1.00

S98: <sup>19</sup>F NMR spectrum of 3zd

NRLD-436

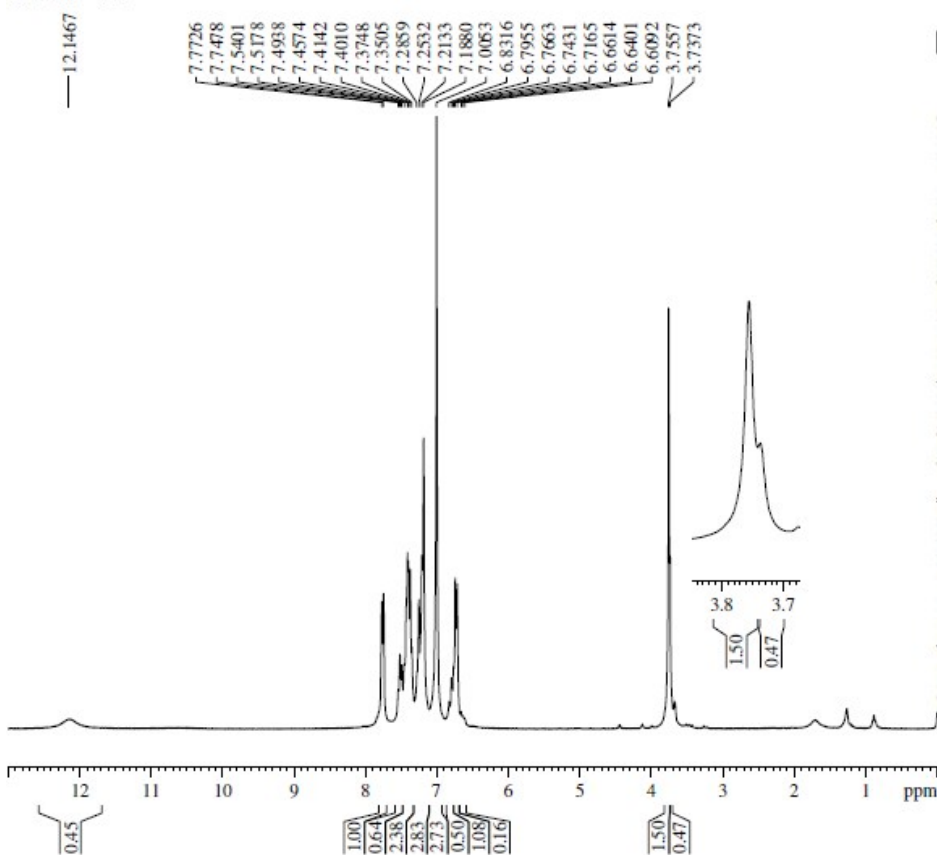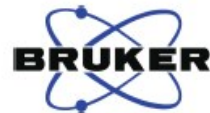

Current Data Parameters  
NAME 27-May-FN-2020  
EXPNO 590  
PROCNO 1

F2 - Acquisition Parameters  
Date\_ 20200527  
Time 15.07  
INSTRUM spect  
PROBHD 5 mm QNP 1H/13  
PULPROG zg30  
TD 65536  
SOLVENT CDCl3  
NS 16  
DS 2  
SWH 6188.119 Hz  
FIDRES 0.094423 Hz  
AQ 5.2953086 sec  
RG 181  
DW 80.800 usec  
DE 6.50 usec  
TE 300.0 K  
D1 1.00000000 sec  
TD0 1

==== CHANNEL f1 ====  
NUC1 1H  
P1 13.95 usec  
PL1 -1.00 dB  
PL1W 15.02081871 W  
SFO1 300.2598542 MHz

F2 - Processing parameters  
SI 32768  
SF 300.2580096 MHz  
WDW EM  
SSB 0  
LB 0.30 Hz  
GB 0  
PC 1.00

S99: <sup>1</sup>H NMR spectrum of 3ze

NRLD-436

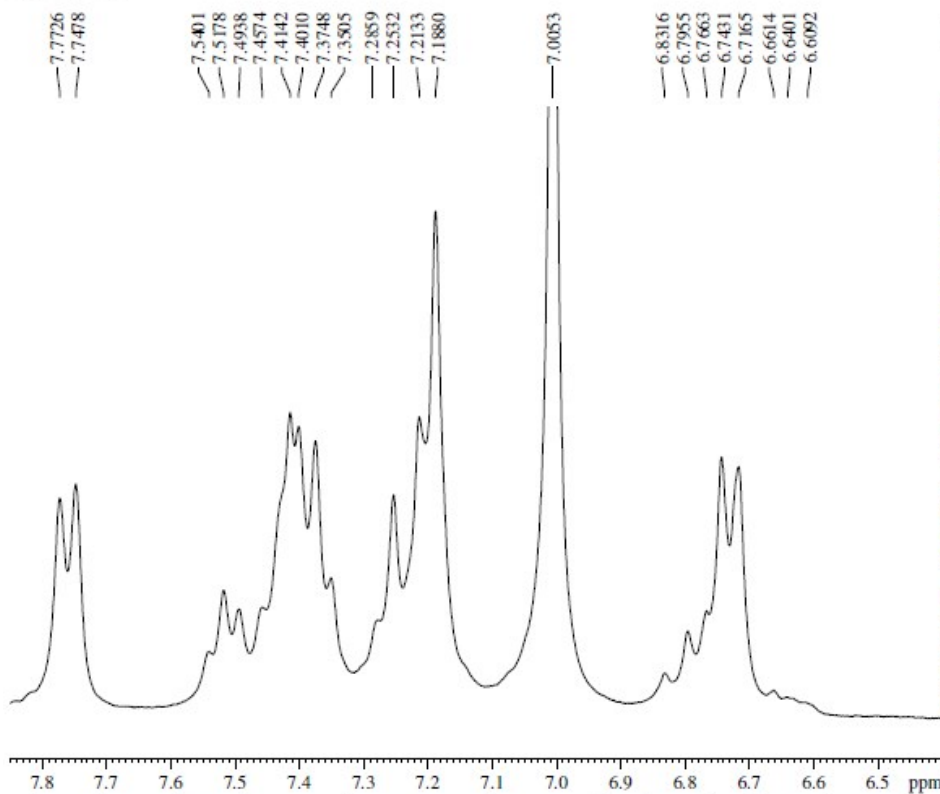

S100: <sup>1</sup>H NMR spectrum of 3ze (expansion)

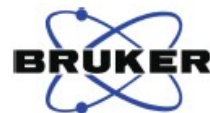

Current Data Parameters  
 NAME 27-May-FN-2020  
 EXPNO 590  
 PROCNO 1

F2 - Acquisition Parameters  
 Date\_ 20200527  
 Time 15.07  
 INSTRUM spect  
 PROBHD 5 mm QNP 1H/13  
 PULPROG zg30  
 TD 65536  
 SOLVENT CDC13  
 NS 16  
 DS 2  
 SWH 6188.119 Hz  
 FIDRES 0.094423 Hz  
 AQ 5.2953086 sec  
 RG 181  
 DW 80.800 usec  
 DE 6.50 usec  
 TE 300.0 K  
 DT 1.00000000 sec  
 TDO 1

==== CHANNEL f1 ====  
 NUC1 1H  
 P1 13.95 usec  
 PL1 -1.00 dB  
 PL1W 15.02081871 W  
 SFO1 300.2598542 MHz

F2 - Processing parameters  
 SI 32768  
 SF 300.2580096 MHz  
 WDW EM  
 SSB 0  
 LB 0.30 Hz  
 GB 0  
 PC 1.00

NRLD-436

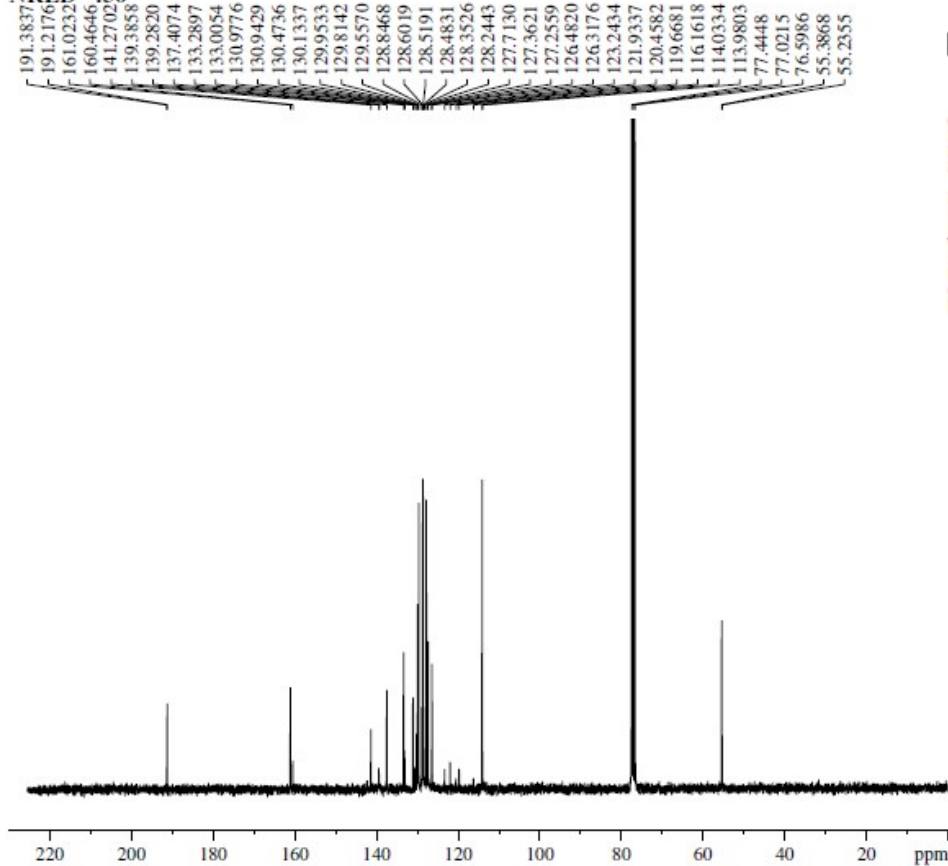

S101: <sup>13</sup>C NMR spectrum of 3ze

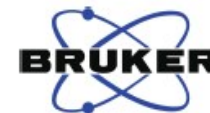

Current Data Parameters  
 NAME 27-May-FN-2020  
 EXPNO 600  
 PROCNO 1

F2 - Processing parameters  
 SI 32768  
 SF 75.4999349 MHz  
 WDW EM  
 SSB 0  
 LB 1.00 Hz  
 GB 0  
 PC 1.40

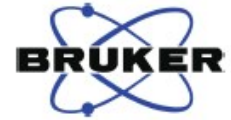

Current Data Parameters  
 NAME 02-JUNE-FN-2020  
 EXPNO 500  
 PROCNO 1

F2 - Acquisition Parameters  
 Date\_ 20200602  
 Time 17.16  
 INSTRUM spect  
 PROBHD 5 mm PABBO BB/  
 PULPROG zgpg30  
 TD 131072  
 SOLVENT CDCl3  
 NS 16  
 DS 4  
 SWH 89285.711 Hz  
 FIDRES 0.681196 Hz  
 AQ 0.7340032 sec  
 RG 201.48  
 DW 5.600 usec  
 DE 6.50 usec  
 TE 300.0 K  
 D1 1.00000000 sec  
 D11 0.03000000 sec  
 D12 0.00002000 sec  
 TD0 1

==== CHANNEL f1 ====  
 SFO1 376.4894122 MHz  
 NUC1 19F  
 P1 15.00 usec  
 PLW1 21.00000000 W

==== CHANNEL f2 ====  
 SFO2 400.1621006 MHz  
 NUC2 1H  
 CPDPRG2 waltz16  
 PCPD2 90.00 usec  
 PLW2 13.00000000 W  
 PLW12 0.27963999 W

F2 - Processing parameters  
 SI 65556  
 SF 376.5270650 MHz  
 WDW EM  
 SSB 0  
 LB 0.30 Hz  
 GB 0  
 PC 1.00

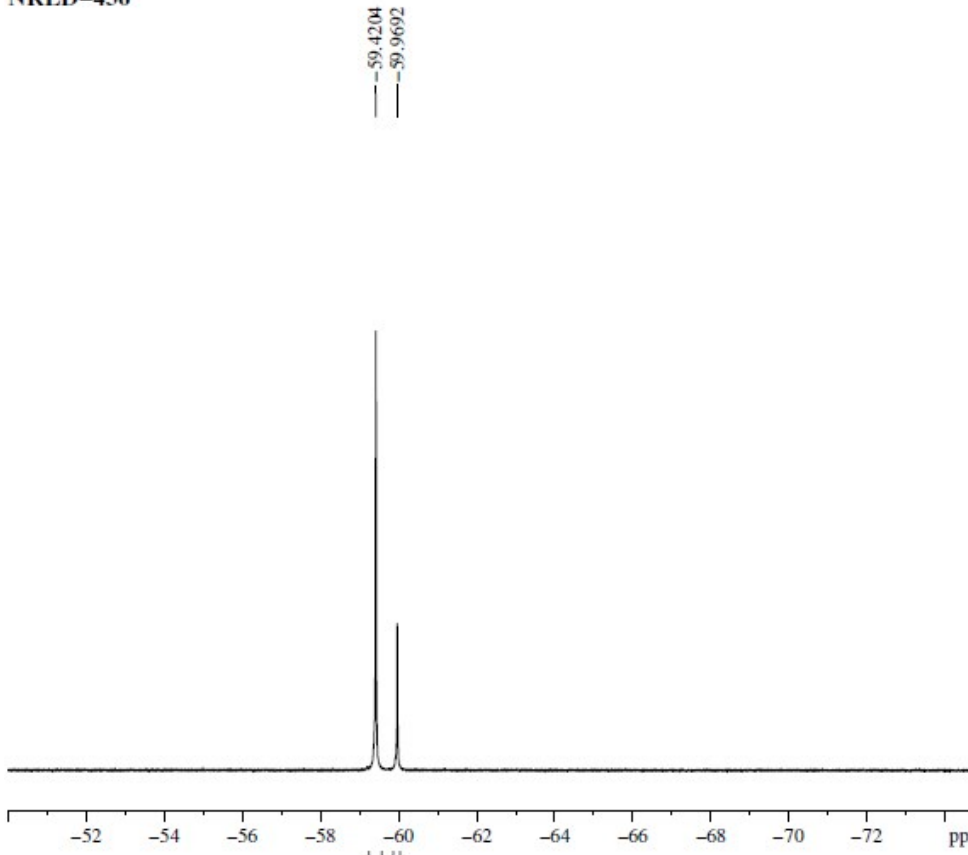

S102: <sup>19</sup>F NMR spectrum of 3ze

| Sample Name   | HRMS20124JAN08 | Position    | Vial 8      | Instrument Name | Instrument 1 | User Name              |                      |
|---------------|----------------|-------------|-------------|-----------------|--------------|------------------------|----------------------|
| Inj Vol       | 2              | InjPosition |             | SampleType      | Sample       | IRM Calibration Status | Success              |
| Data Filename | NRLD-406-L.d   | ACQ Method  | ISOCRATIC.m | Comment         |              | Acquired Time          | 1/24/2020 4:47:25 PM |

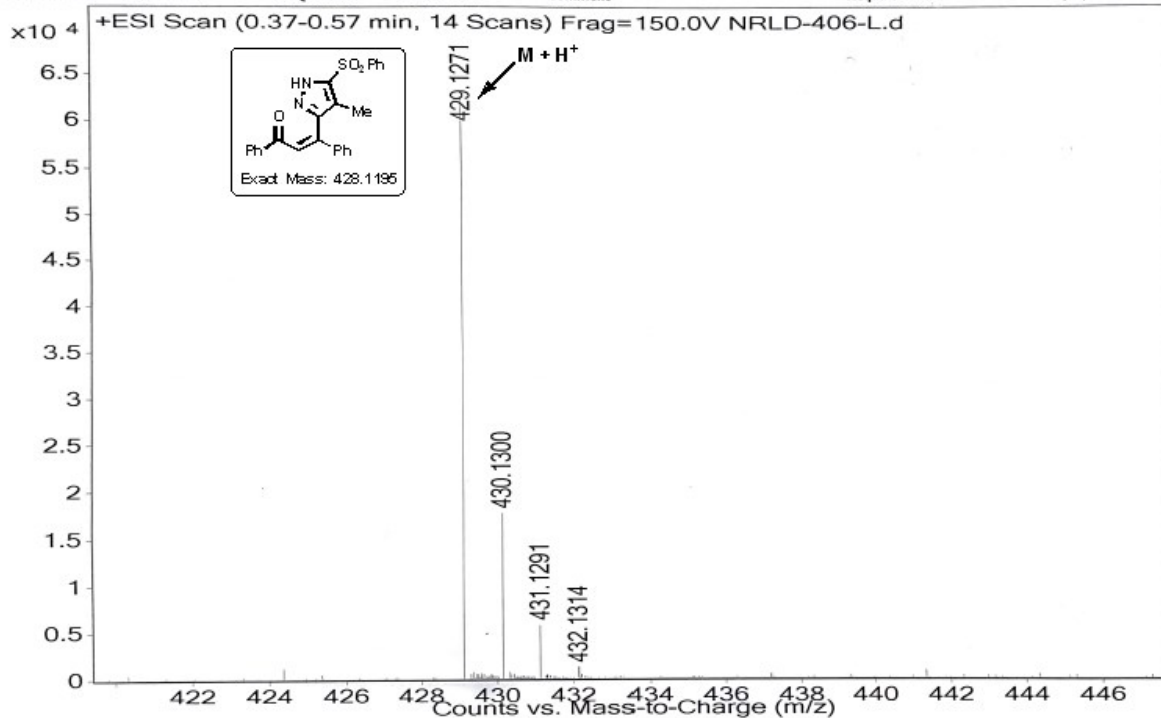

S103: HRMS of 3zf



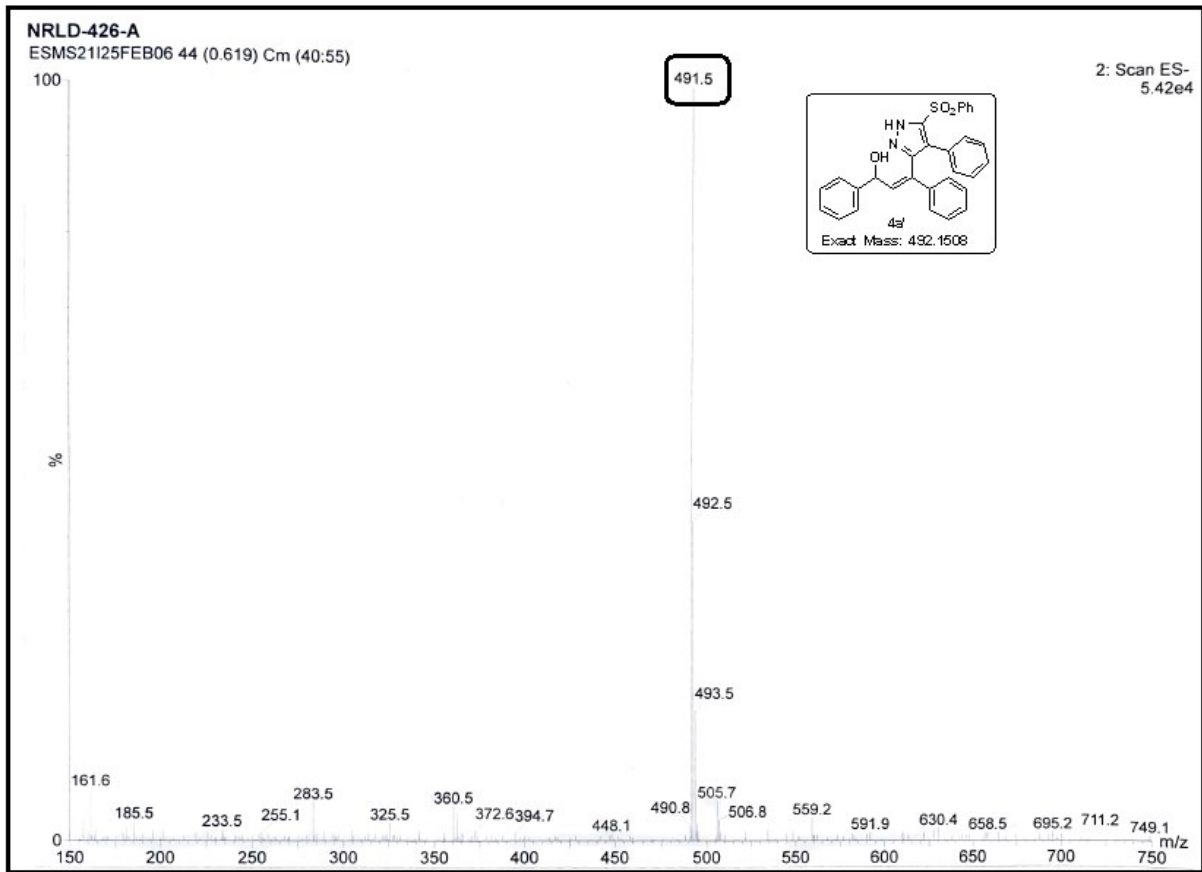

**S104: ESMS of 4a'**

**NRLD-426**

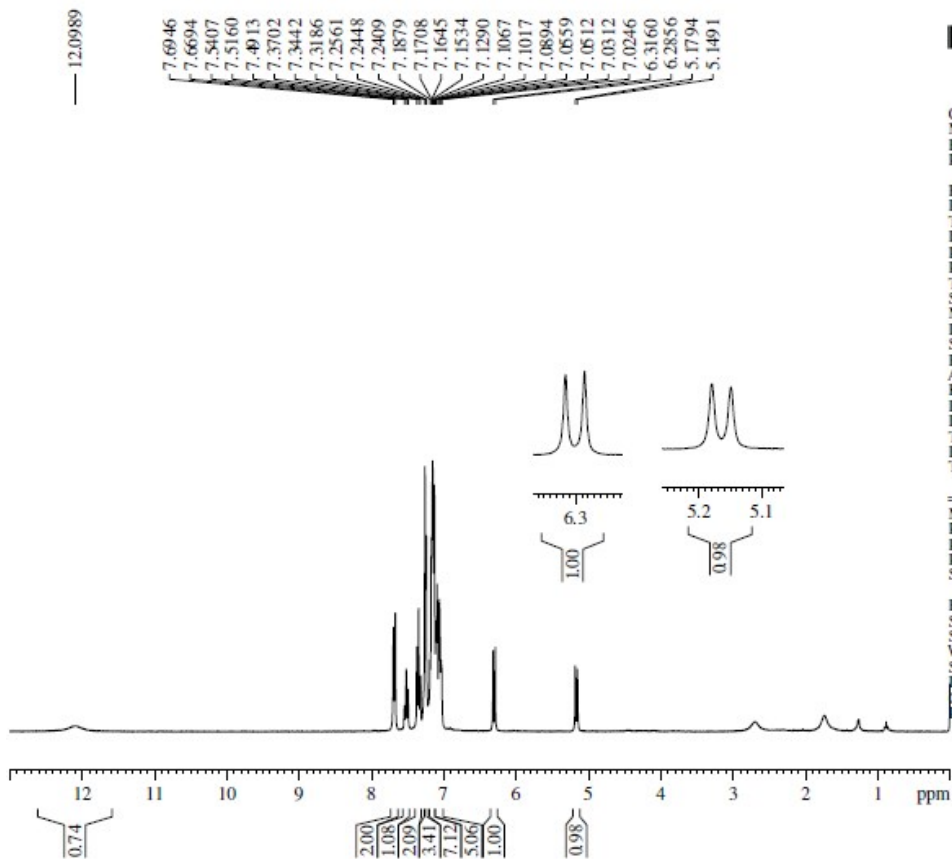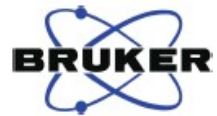

Current Data Parameters  
NAME 27-May-FN-2020  
EXPNO 330  
PROCNO 1

F2 - Acquisition Parameters  
Date\_ 20200527  
Time 14.37  
INSTRUM spect  
PROBHD 5 mm QNP 1H/13  
PULPROG zg30  
TD 65536  
SOLVENT CDCl3  
NS 16  
DS 2  
SWH 6188.119 Hz  
FIDRES 0.094423 Hz  
AQ 5.2953086 sec  
RG 256  
DW 80.800 usec  
DE 6.50 usec  
TE 300.0 K  
D1 1.0000000 sec  
TD0 1

==== CHANNEL f1 ====  
NUC1 1H  
P1 13.95 usec  
PL1 -1.00 dB  
PL1W 15.02081871 W  
SFO1 300.2598542 MHz

F2 - Processing parameters  
SI 32768  
SF 300.2580086 MHz  
WDW EM  
SSB 0  
LB 0.30 Hz  
GB 0  
PC 1.00

**S105: <sup>1</sup>H NMR spectrum of 4a**



NRLD-426

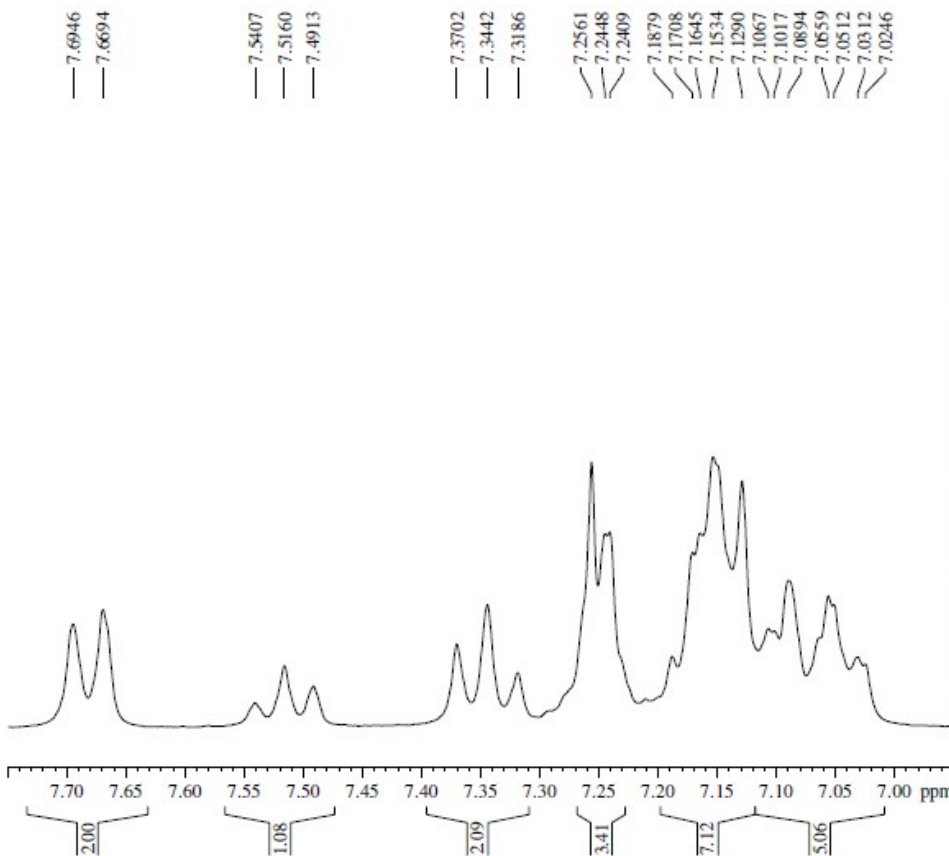

S106:  $^1\text{H}$  NMR spectrum of 4a (expansion)

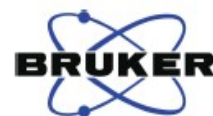

Current Data Parameters  
NAME 27-May-FN-2020  
EXPNO 330  
PROCNO 1

F2 - Acquisition Parameters  
Date\_ 20200527  
Time 14.37  
INSTRUM spect  
PROBHD 5 mm QNP 1H/13  
PULPROG zg30  
TD 65536  
SOLVENT CDCl3  
NS 16  
DS 2  
SWH 6188.119 Hz  
FIDRES 0.094423 Hz  
AQ 5.2953086 sec  
RG 256  
DW 80.800 usec  
DE 6.50 usec  
TE 300.0 K  
D1 1.00000000 sec  
TD0 1

==== CHANNEL f1 ====  
NUC1 1H  
P1 13.95 usec  
PL1 -1.00 dB  
PL1W 15.02081871 W  
SFO1 300.2598542 MHz

F2 - Processing parameters  
SI 32768  
SF 300.2580086 MHz  
WDW EM  
SSB 0  
LB 0.30 Hz  
GB 0  
PC 1.00

NRLD-426

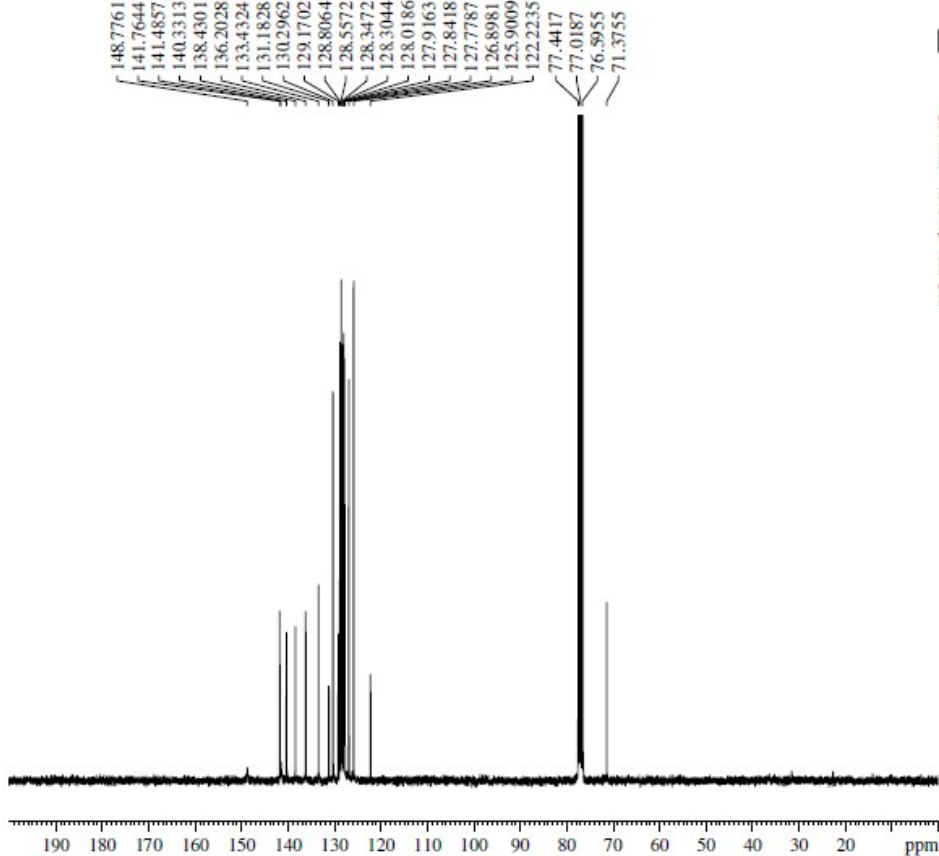

S107:  $^{13}\text{C}$  NMR spectrum of 4a

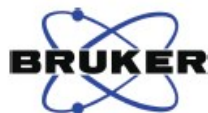

Current Data Parameters  
NAME 28-May-FN-2020  
EXPNO 350  
PROCNO 1

F2 - Processing parameters  
SI 32768  
SF 75.4999361 MHz  
WDW EM  
SSB 0  
LB 1.00 Hz  
GB 0  
PC 1.40

NRLD-438

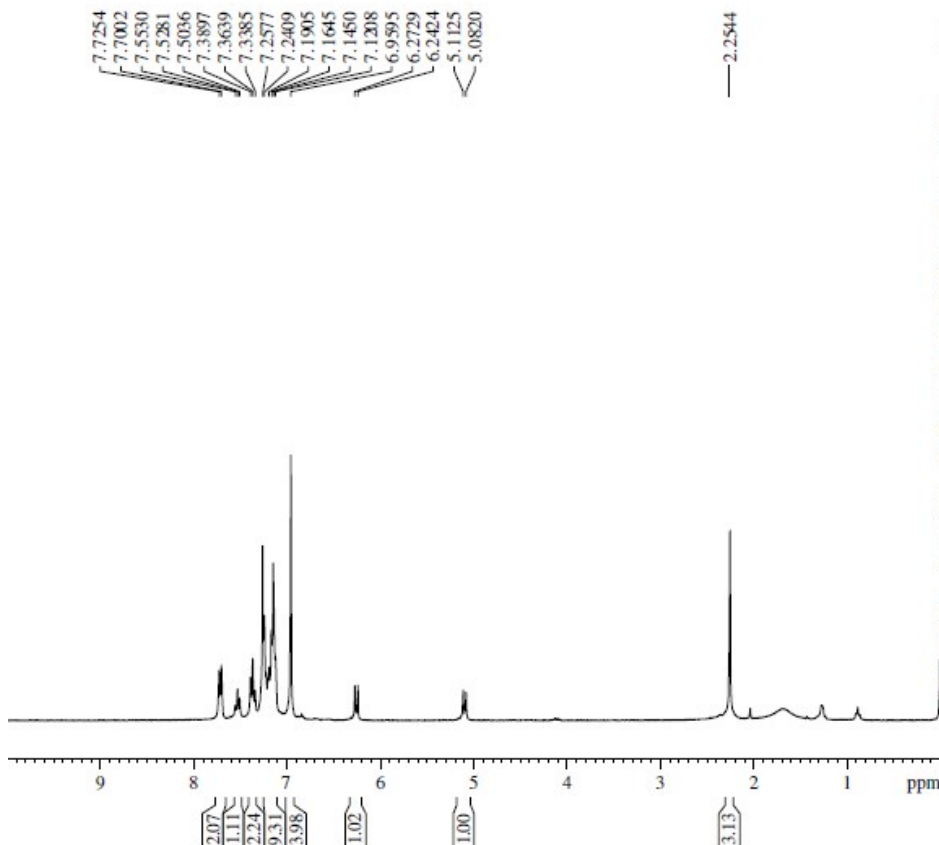

S108:  $^1\text{H}$  NMR spectrum of **4b**

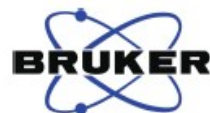

Current Data Parameters  
NAME 03-June-FN-2020  
EXPNO 390  
PROCNO 1

F2 - Acquisition Parameters  
Date\_ 20200603  
Time 11.53  
INSTRUM spect  
PROBHD 5 mm QNP 1H/13  
PULPROG zg30  
TD 65536  
SOLVENT CDCl3  
NS 16  
DS 2  
SWH 6188.119 Hz  
FIDRES 0.094423 Hz  
AQ 5.2953086 sec  
RG 287  
DW 80.800 usec  
DE 6.50 usec  
TE 300.0 K  
D1 1.00000000 sec  
TD0 1

==== CHANNEL f1 ====  
NUC1 1H  
P1 13.95 usec  
PL1 -1.00 dB  
PL1W 15.02081871 W  
SFO1 300.2598542 MHz

F2 - Processing parameters  
SI 32768  
SF 300.2580081 MHz  
WDW EM  
SSB 0  
LB 0.30 Hz  
GB 0  
PC 1.00

NRLD-438

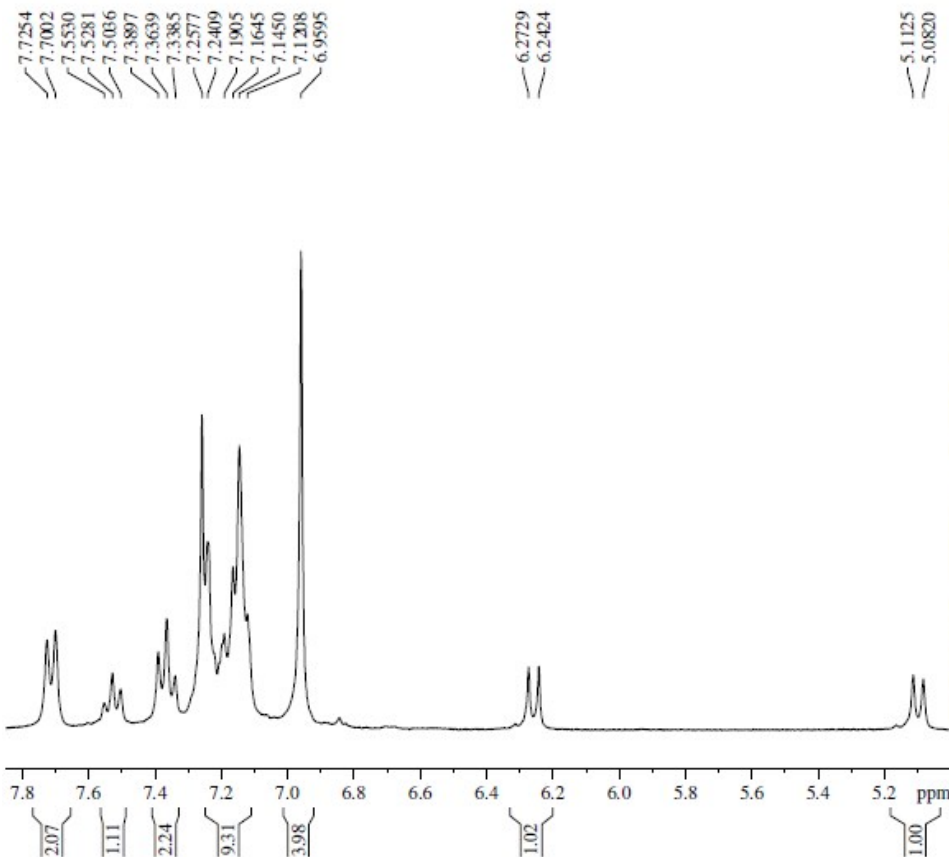

S109:  $^1\text{H}$  NMR spectrum of **4b** (expansion)

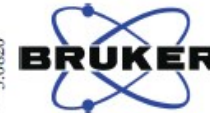

Current Data Parameters  
NAME 03-June-FN-2020  
EXPNO 390  
PROCNO 1

F2 - Acquisition Parameters  
Date\_ 20200603  
Time 11.53  
INSTRUM spect  
PROBHD 5 mm QNP 1H/13  
PULPROG zg30  
TD 65536  
SOLVENT CDCl3  
NS 16  
DS 2  
SWH 6188.119 Hz  
FIDRES 0.094423 Hz  
AQ 5.2953086 sec  
RG 287  
DW 80.800 usec  
DE 6.50 usec  
TE 300.0 K  
D1 1.00000000 sec  
TD0 1

==== CHANNEL f1 ====  
NUC1 1H  
P1 13.95 usec  
PL1 -1.00 dB  
PL1W 15.02081871 W  
SFO1 300.2598542 MHz

F2 - Processing parameters  
SI 32768  
SF 300.2580081 MHz  
WDW EM  
SSB 0  
LB 0.30 Hz  
GB 0  
PC 1.00

NRLD-438

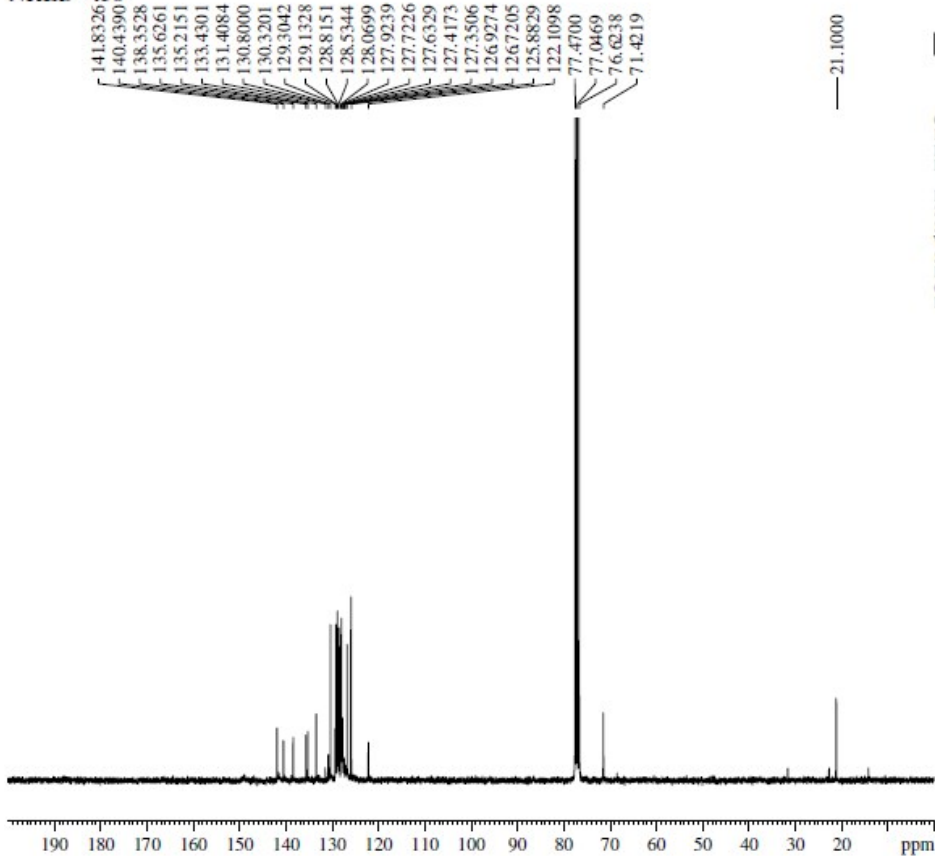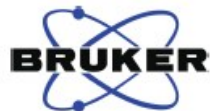

Current Data Parameters  
NAME 04-JUNE-AN-2020  
EXPNO 350  
PROCNO 1

F2 - Processing parameters  
SI 32768  
SF 75.4999340 MHz  
WDW EM  
SSB 0  
LB 1.00 Hz  
GB 0  
PC 1.40

S110: <sup>13</sup>C NMR spectrum of 4b

NRLD-394

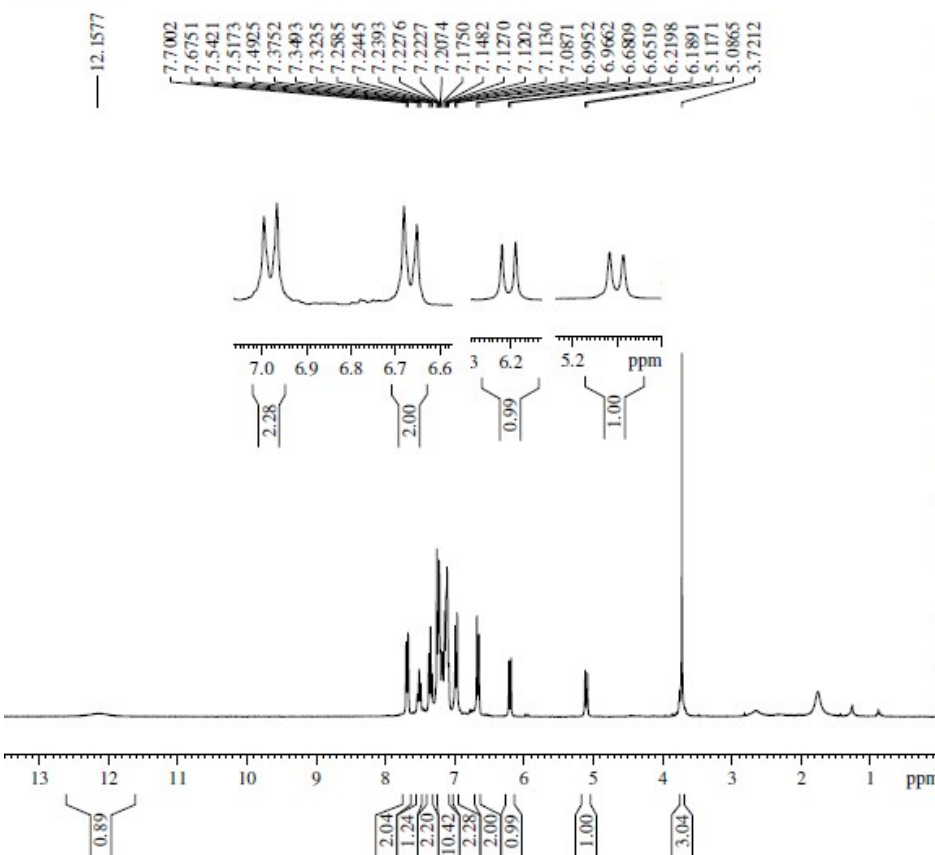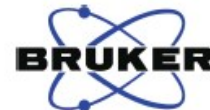

Current Data Parameters  
NAME 17-Jan-AN-2020  
EXPNO 560  
PROCNO 1

F2 - Acquisition Parameters  
Date\_ 20200117  
Time 11.10  
INSTRUM spect  
PROBHD 5 mm QNP 1H/13  
PULPROG zg30  
TD 65536  
SOLVENT CDCl3  
NS 16  
DS 2  
SWH 6188.119 Hz  
FIDRES 0.094423 Hz  
AQ 5.2953086 sec  
RG 287  
DW 80.800 usec  
DE 6.50 usec  
TE 300.0 K  
D1 1.00000000 sec  
TD0 1

==== CHANNEL f1 ====  
NUC1 1H  
P1 13.95 usec  
PL1 -1.00 dB  
PL1W 15.02081871 W  
SFO1 300.2598542 MHz

F2 - Processing parameters  
SI 32768  
SF 300.2580079 MHz  
WDW EM  
SSB 0  
LB 0.30 Hz  
GB 0  
PC 1.00

S111: <sup>1</sup>H NMR spectrum of 4c

NRLD-394

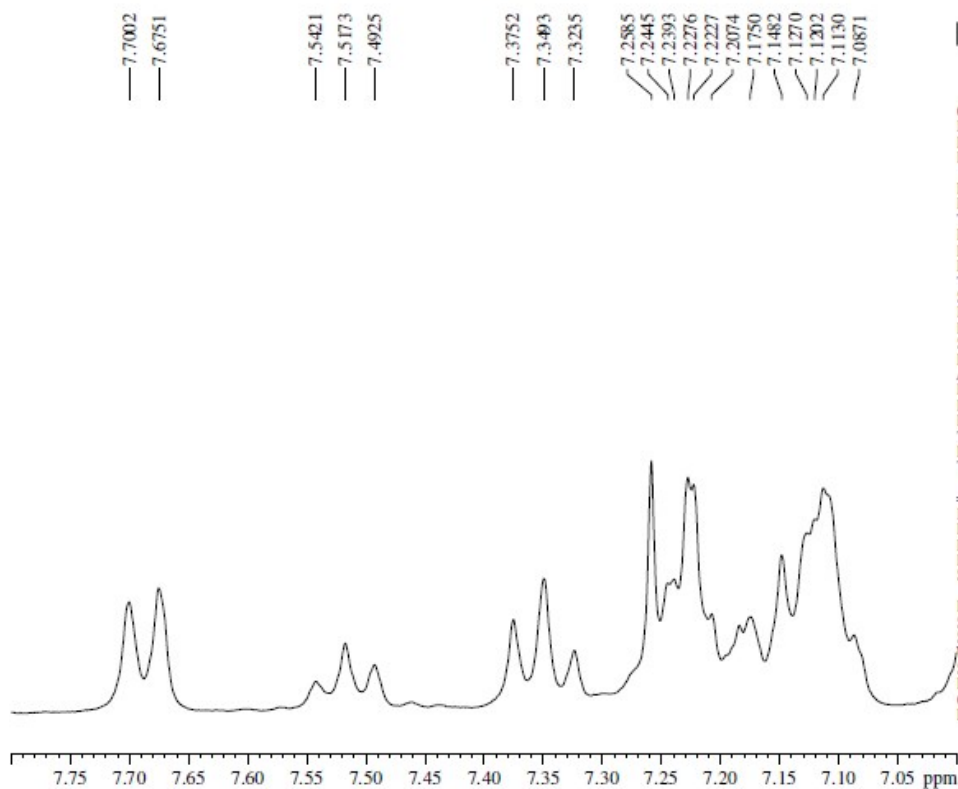

S112: <sup>1</sup>H NMR spectrum of 4c (expansion)

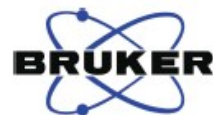

Current Data Parameters  
NAME 17-Jan-AN-2020  
EXPNO 560  
PROCNO 1

F2 - Acquisition Parameters  
Date\_ 20200117  
Time 11.10  
INSTRUM spect  
PROBHD 5 mm QNP 1H/13  
PULPROG zg30  
TD 65536  
SOLVENT CDC13  
NS 16  
DS 2  
SWH 6188.119 Hz  
FIDRES 0.094423 Hz  
AQ 5.2953086 sec  
RG 287  
DW 80.800 usec  
DE 6.50 usec  
TE 300.0 K  
D1 1.00000000 sec  
TD0 1

==== CHANNEL f1 ====  
NUC1 1H  
P1 13.95 usec  
PL1 -1.00 dB  
PL1W 15.02081871 W  
SFO1 300.2598542 MHz

F2 - Processing parameters  
SI 32768  
SF 300.2580079 MHz  
WDW EM  
SSB 0  
LB 0.30 Hz  
GB 0  
PC 1.00

NRLD-394

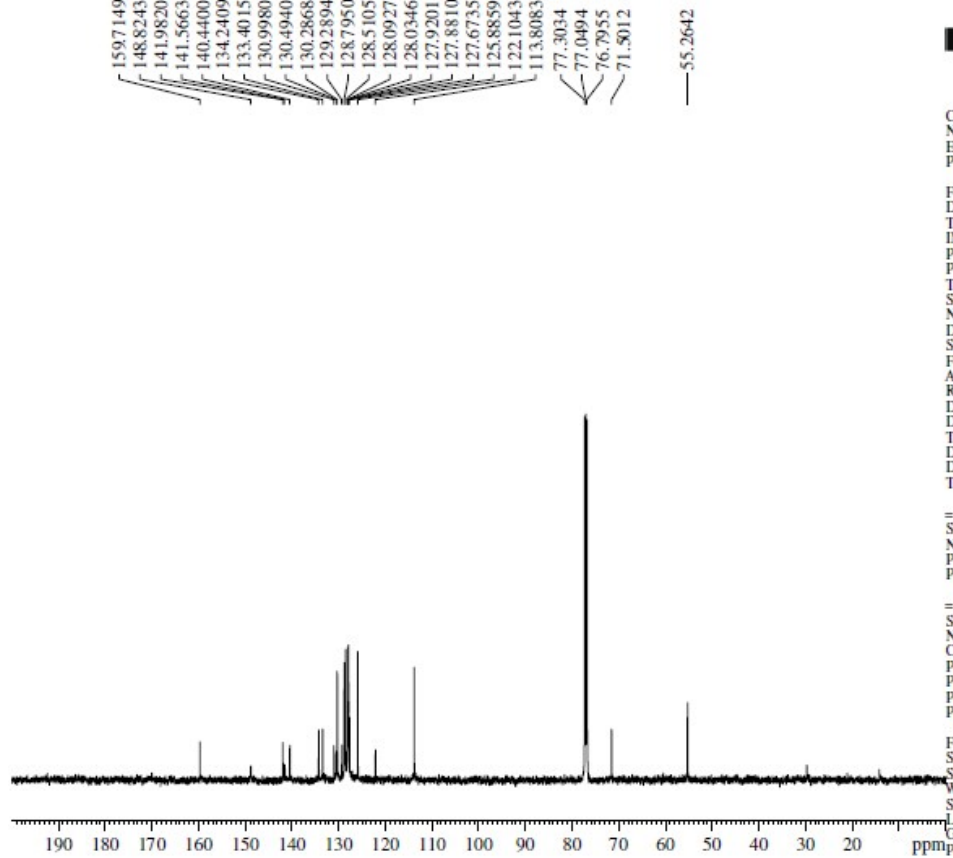

S113: <sup>13</sup>C NMR spectrum of 4c

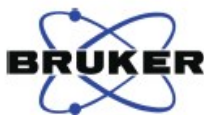

Current Data Parameters  
NAME 27-July-FN-2020  
EXPNO 560  
PROCNO 1

F2 - Acquisition Parameters  
Date\_ 20200727  
Time 8.01  
INSTRUM spect  
PROBHD 5 mm PATX1 1H/  
PULPROG zgpg30  
TD 65536  
SOLVENT CDC13  
NS 4096  
DS 0  
SWH 29761.904 Hz  
FIDRES 0.454131 Hz  
AQ 1.1010048 sec  
RG 56.22  
DW 16.800 usec  
DE 6.50 usec  
TE 303.0 K  
D1 2.00000000 sec  
D11 0.03000000 sec  
TD0 1

==== CHANNEL f1 ====  
SFO1 125.9077573 MHz  
NUC1 13C  
P1 9.23 usec  
PLW1 244.00000000 W

==== CHANNEL f2 ====  
SFO2 500.6783527 MHz  
NUC2 1H  
CPDPRG[2] waltz16  
PCPD2 80.00 usec  
PLW2 13.60000038 W  
PLW12 0.08840500 W  
PLW13 0.05657900 W

F2 - Processing parameters  
SI 32768  
SF 125.8951680 MHz  
WDW EM  
SSB 0  
LB 3.00 Hz  
GB 0  
PC 1.40



NRLD-428

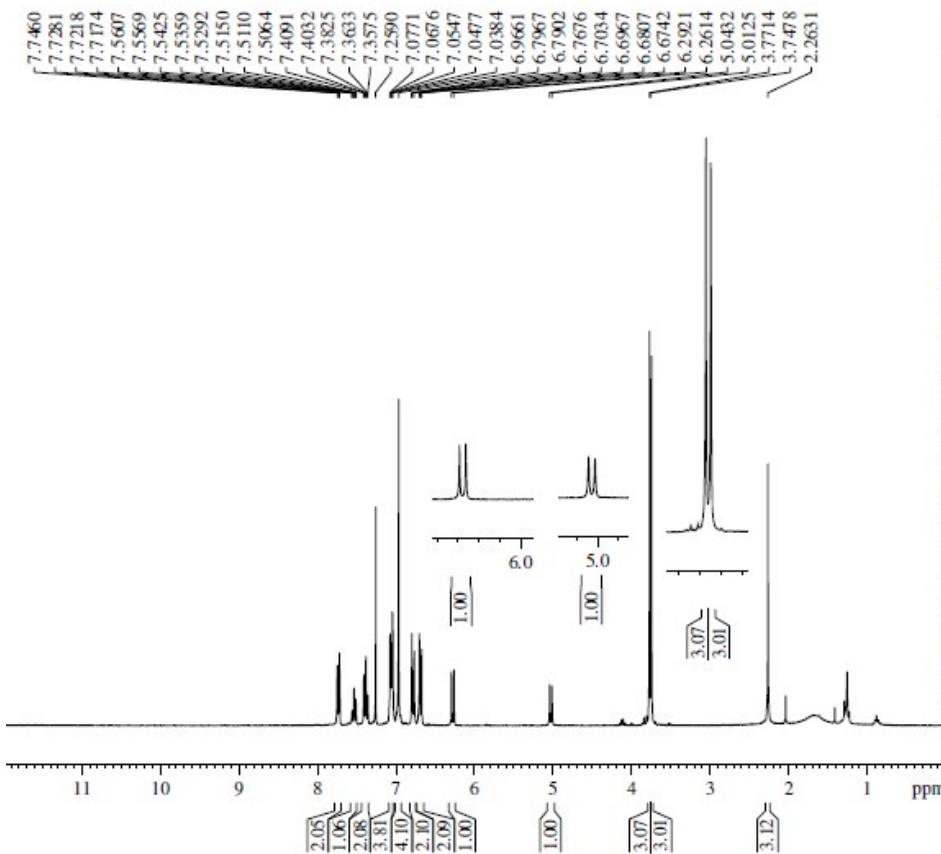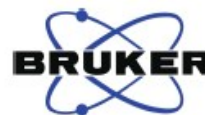

Current Data Parameters  
 NAME 08-JUNE-AN-2020  
 EXPNO 310  
 PROCNO 1

F2 - Acquisition Parameters  
 Date\_ 20200608  
 Time 15.42  
 INSTRUM spect  
 PROBHD 5 mm QNP 1H/13  
 PULPROG zg30  
 TD 65536  
 SOLVENT CDC13  
 NS 16  
 DS 2  
 SWH 6188.119 Hz  
 FIDRES 0.094423 Hz  
 AQ 5.2953086 sec  
 RG 322  
 DW 80.800 usec  
 DE 6.50 usec  
 TE 300.0 K  
 D1 1.00000000 sec  
 TDO 1

==== CHANNEL f1 ====  
 NUC1 1H  
 P1 13.95 usec  
 PL1 -1.00 dB  
 PL1W 15.02081871 W  
 SFO1 300.2598542 MHz  
 F2 - Processing parameters  
 SI 32768  
 SF 300.2580078 MHz  
 WDW EM  
 SSB 0  
 LB 0.30 Hz  
 GB 0  
 PC 1.00

S114: <sup>1</sup>H NMR spectrum of 4d

NRLD-428

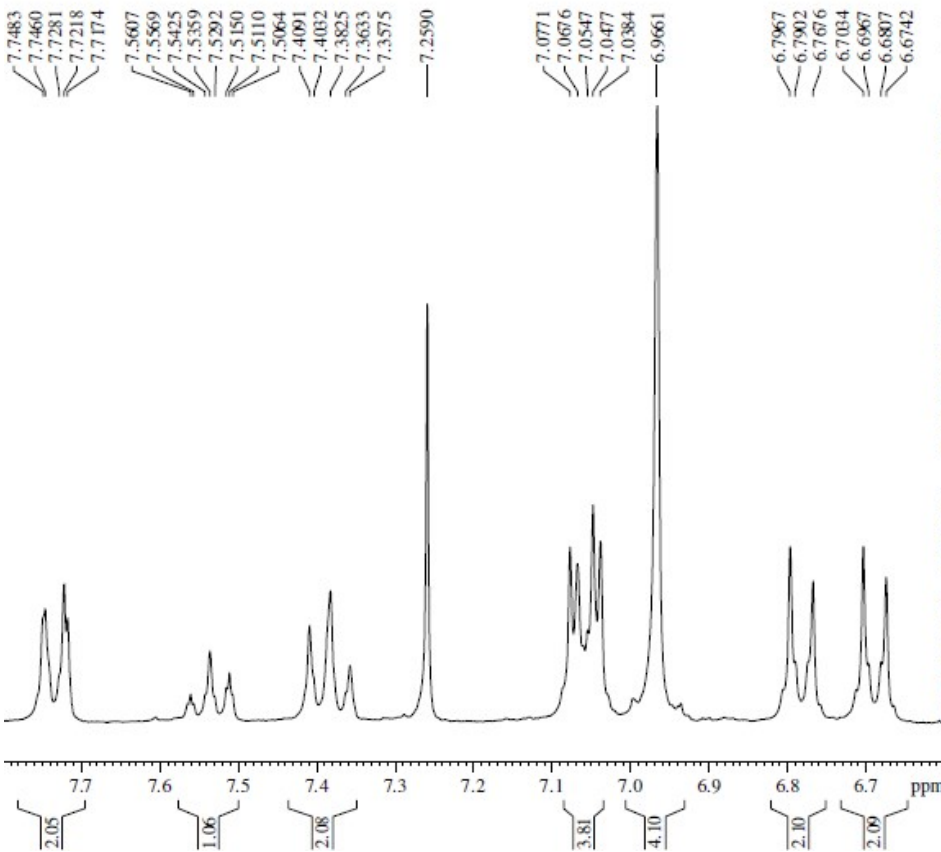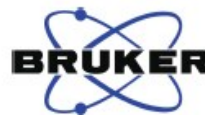

Current Data Parameters  
 NAME 08-JUNE-AN-2020  
 EXPNO 310  
 PROCNO 1

F2 - Acquisition Parameters  
 Date\_ 20200608  
 Time 15.42  
 INSTRUM spect  
 PROBHD 5 mm QNP 1H/13  
 PULPROG zg30  
 TD 65536  
 SOLVENT CDC13  
 NS 16  
 DS 2  
 SWH 6188.119 Hz  
 FIDRES 0.094423 Hz  
 AQ 5.2953086 sec  
 RG 322  
 DW 80.800 usec  
 DE 6.50 usec  
 TE 300.0 K  
 D1 1.00000000 sec  
 TDO 1

==== CHANNEL f1 ====  
 NUC1 1H  
 P1 13.95 usec  
 PL1 -1.00 dB  
 PL1W 15.02081871 W  
 SFO1 300.2598542 MHz  
 F2 - Processing parameters  
 SI 32768  
 SF 300.2580078 MHz  
 WDW EM  
 SSB 0  
 LB 0.30 Hz  
 GB 0  
 PC 1.00

S115: <sup>1</sup>H NMR spectrum of 4d (expansion)



NRLD-428

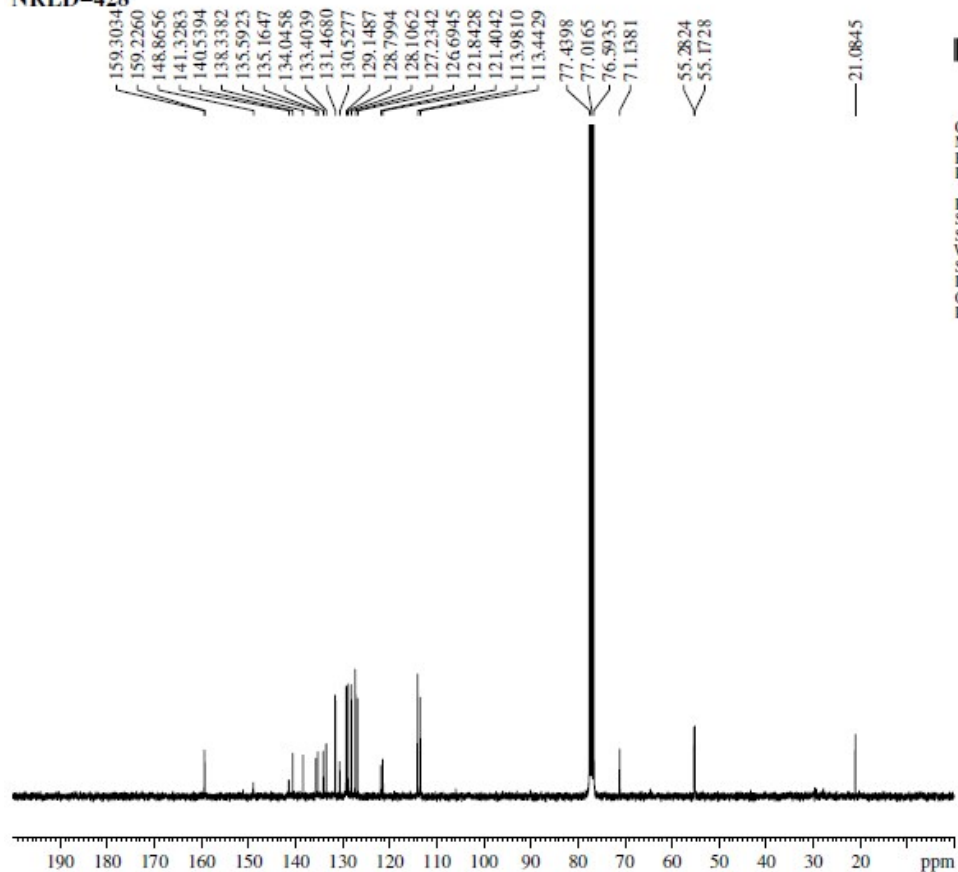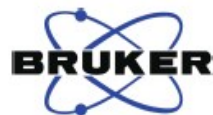

Current Data Parameters  
NAME 08-JUNE-AN-2020  
EXPNO 320  
PROCNO 1

F2 - Processing parameters  
SI 32768  
SF 75.4999347 MHz  
WDW EM  
SSB 0  
LB 1.00 Hz  
GB 0  
PC 1.40

S116: <sup>13</sup>C NMR spectrum of 4d
